# Supplementary material for: Visible light-driven fluoroalkylthiocyanation of alkenes via electron donor–acceptor complexes
Source: Royal Society of Chemistry journal article supplement (doi:10.1039/d1qo00126d), 2021-01-01

# Visible-light-Driven, Fluoroalkylthiocyanation of Alkenes via Electron Donor-Acceptor Complexes

Zebiao Li<sup>a,b,†</sup>, Shan Wang<sup>a,†</sup>, Yumei Huo<sup>a</sup>, Bing Wang<sup>b</sup>, Jun Yan<sup>b</sup>, and Quanping Guo<sup>a,\*</sup>

<sup>a</sup> Key Laboratory of Preclinical Study for New Drugs of Gansu Province, School of Basic Medical Sciences, Lanzhou University, 199 West Donggang Road, Lanzhou 730000 (China).

<sup>b</sup> Changzhou Pharmaceutical Factory Co., LTD. Changzhou, China

## Supporting Information

### Table of Content:

|                                                                               |           |
|-------------------------------------------------------------------------------|-----------|
| <b>1. General Information .....</b>                                           | <b>1</b>  |
| <b>2. Optimization of the reaction conditions .....</b>                       | <b>1</b>  |
| <b>3. General procedure for the fluoroalkylthiocyanation of alkenes .....</b> | <b>3</b>  |
| <b>4. Synthetic Applications .....</b>                                        | <b>3</b>  |
| <b>5. The Mechanistic Study. ....</b>                                         | <b>4</b>  |
| <b>6. References. ....</b>                                                    | <b>7</b>  |
| <b>7. Characterization of products .....</b>                                  | <b>8</b>  |
| <b>8. NMR spectra of the products .....</b>                                   | <b>22</b> |

## 1. General Information

Unless otherwise stated, all the reactions were carried out under argon atmosphere. All solvents purified and dried according to standard methods prior to use.  $^1\text{H}$  NMR,  $^{13}\text{C}$  NMR, and  $^{19}\text{F}$  NMR spectra were recorded on a Bruker instrument (300 MHz, 75MHz, and 282 MHz) spectrometer in  $\text{CDCl}_3$  using tetramethylsilane (TMS) as the internal standard unless otherwise noted. Data for  $^1\text{H}$  NMR are recorded as follows: chemical shift ( $\delta$ , ppm), multiplicity (s = singlet, d = doublet, t = triplet, m = multiplet, br = broad, q = quartet, coupling constant(s) in Hz integration). Data for  $^{13}\text{C}$  NMR and  $^{19}\text{F}$  NMR reported in terms of chemical shift ( $\delta$ , ppm). HRMS obtained by the ESI ionization sources.

## 2. Optimization of the reaction conditions

Table S1. Cu Catalysts Screening.

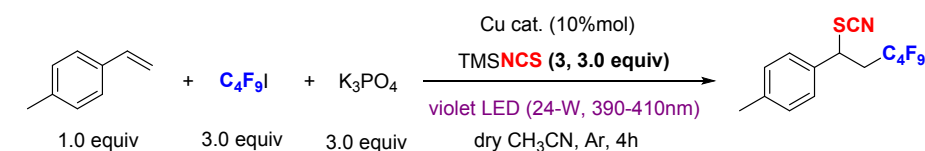

| Entry | Cu cat.                                             | Yield (%) <sup>b</sup> | Entry | Cu cat.               | Yield (%) <sup>b</sup> |
|-------|-----------------------------------------------------|------------------------|-------|-----------------------|------------------------|
| 1     | CuI                                                 | 31%                    | 5     | Cu(OTf) <sub>2</sub>  | 32%                    |
| 2     | CuBr                                                | 70%                    | 6     | Cu(OAc) <sub>2</sub>  | 33%                    |
| 3     | CuCl                                                | 87%                    | 7     | Cu(acac) <sub>2</sub> | 48%                    |
| 4     | Cu(CH <sub>3</sub> CN) <sub>4</sub> PF <sub>6</sub> | 23%                    | 8     | CuF <sub>2</sub>      | 25%                    |

<sup>a</sup> Unless otherwise noted, the reactions were carried out by using **2a** (0.1 mmol), **1a** (3.0 equiv), **3** (3 equiv), K<sub>3</sub>PO<sub>4</sub> (3 equiv), CH<sub>3</sub>CN (1.0 mL), Cu catalyst (10 mol %), under Ar, and stirred at rt for 4 h under 24-W violet LED irradiation. <sup>b</sup>  $^1\text{H}$  NMR yields with anisole internal standard. <sup>c</sup> isolated yield.

Table S2. Electron donor Screening.

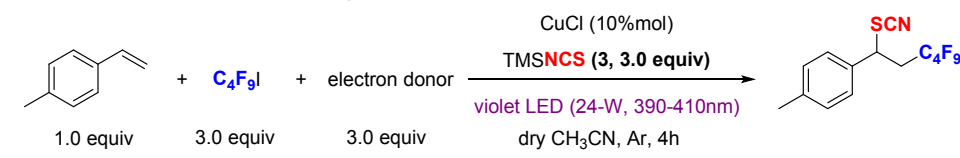

| Entry | electron donor      | Yield (%) <sup>b</sup> | Entry | electron donor                  | Yield (%) <sup>b</sup> |
|-------|---------------------|------------------------|-------|---------------------------------|------------------------|
| 1     | DIPEA               | 0                      | 6     | CS <sub>2</sub> CO <sub>3</sub> | 2%                     |
| 2     | Et <sub>3</sub> N   | 0                      | 7     | K <sub>2</sub> CO <sub>3</sub>  | 51%                    |
| 3     | iPr <sub>2</sub> NH | 10%                    | 8     | Na <sub>2</sub> CO <sub>3</sub> | 52%                    |
| 4     | TMG                 | 0                      | 9     | K <sub>3</sub> PO <sub>4</sub>  | 87%                    |
| 5     | t-BuOLi             | 0                      | 10    | KHCO <sub>3</sub>               | 48%                    |

<sup>a</sup>0.1mmol scale. <sup>b</sup> $^1\text{H}$  NMR yields with anisole internal standard.

**Table S3. Solvents Screening.**

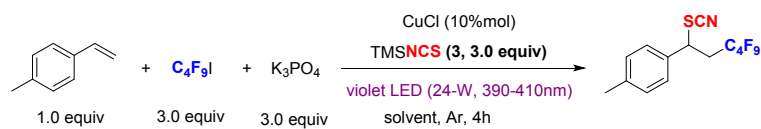

| Entry | Solvent            | Yield (%) <sup>b</sup> |
|-------|--------------------|------------------------|
| 1     | CH <sub>3</sub> CN | 87%                    |
| 2     | DMF                | 0                      |
| 3     | DMSO               | 0                      |
| 4     | DCM                | 10%                    |

<sup>a</sup>0.1mmol scale. <sup>b</sup><sup>1</sup>H NMR yields with anisole internal standard

**Table S4. Reactions under different wavelengths photo irradiation.**

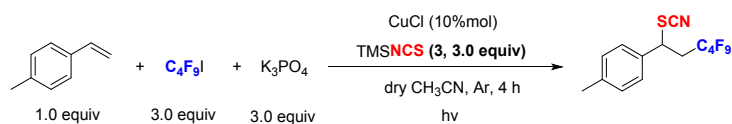

| Entry | <i>hν</i>  | Yield (%) <sup>b</sup> |
|-------|------------|------------------------|
| 1     | 390-410 nm | 87%                    |
| 2     | 254 nm     | 41%                    |
| 3     | blue LED   | 0                      |
| 4     | white LED  | 10%                    |

<sup>a</sup>0.1mmol scale. <sup>b</sup><sup>1</sup>H NMR yields with anisole internal standard

**Table S5. Control experiment**

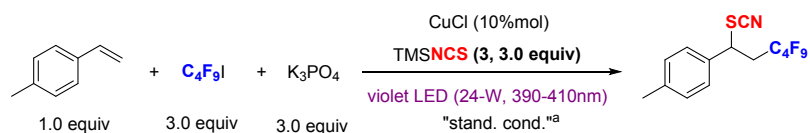

| Entry | Change from the "stand. cond."                                       | Yield(%) <sup>b</sup> | Entry | Change from the "stand. cond."                    | Yield(%) <sup>b</sup> |
|-------|----------------------------------------------------------------------|-----------------------|-------|---------------------------------------------------|-----------------------|
| 1     | 10% K <sub>3</sub> PO <sub>4</sub>                                   | 0                     | 10    | La(OTf) <sub>3</sub> instead of CuCl              | 23                    |
| 2     | 20% K <sub>3</sub> PO <sub>4</sub>                                   | 0                     | 11    | Ni(OTf) <sub>2</sub> instead of CuCl              | 22                    |
| 3     | 50% K <sub>3</sub> PO <sub>4</sub>                                   | 0                     | 12    | Al(OTf) <sub>3</sub> instead of CuCl              | 22                    |
| 4     | 1.0 equiv K <sub>3</sub> PO <sub>4</sub>                             | trace                 | 13    | AlCl <sub>3</sub> instead of CuCl                 | 29                    |
| 5     | 3.0 equiv K <sub>3</sub> PO <sub>4</sub>                             | 87                    | 14    | BF <sub>3</sub> ·OEt <sub>2</sub> instead of CuCl | 12                    |
| 6     | 50% PPh <sub>3</sub> instead of K <sub>3</sub> PO <sub>4</sub>       | 0                     | 15    | without CuCl                                      | 0                     |
| 7     | 3.0 equiv PPh <sub>3</sub> instead of K <sub>3</sub> PO <sub>4</sub> | 0                     | 16    | without K <sub>3</sub> PO <sub>4</sub>            | 0                     |
| 8     | 3.0 equiv H <sub>2</sub> O was added                                 | 0                     | 17    | without light                                     | 0                     |
| 9     | 0.5 equiv H <sub>2</sub> O was added                                 | 6                     | 18    | 2.0 equiv TEMPO was added                         | 0                     |
| 10    | Fe(OTf) <sub>3</sub> instead of CuCl                                 | 19                    | 19    | 2.0 equiv BHT was added                           | 0                     |

<sup>a</sup> Standard condition, the reactions were carried out by using **2a** (0.1 mmol), **1a** (3.0 equiv), **3** (3 equiv), K<sub>3</sub>PO<sub>4</sub> or other donor (3 equiv), solvent (1.0 mL), Lewis acid (10 mol %), under Ar, and stirred at rt for 4 h under 24-W violet LED irradiation. <sup>b</sup><sup>1</sup>H NMR yields with anisole internal standard.

### 3. General procedure for the fluoroalkylthiocyanation of alkenes

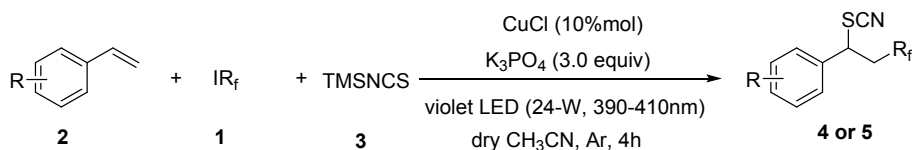

In a dried 10 ml glass test tube, CuCl (0.02 mmol, 2.8 mg), K<sub>3</sub>PO<sub>4</sub> (0.6 mmol, 127 mg) were dissolved in CH<sub>3</sub>CN (2.0 mL) under Ar atmosphere. Then styrene substrate **2** (0.2 mmol), perfluoroalkyl iodide **1** (IR<sub>f</sub>, 0.6 mmol) and TMSNCS (**3**, 0.6 mmol, 78 mg) were added in turn. The glass test tube was transferred to a violet LED photoreactor (24 W, 390–410 nm) stirring for 4 h. After 4 h, the reaction was quenched by H<sub>2</sub>O, extracted by EtOAc, dried over anhydrous sodium sulfate, concentrated in vacuo, and the residue was purified by column chromatography to afford the desired product.

### 4. Synthetic Applications

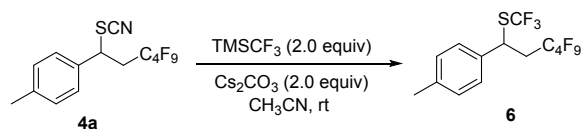

**4a** (0.2 mmol, 79.1 mg), TMSCF<sub>3</sub> (0.4 mmol, 56.9 mg) and Cs<sub>2</sub>CO<sub>3</sub> (0.4 mmol, 65.2 mg) were added into the solution of CH<sub>3</sub>CN (5 ml) in a 10 ml round bottom flask equipped with a stir bar at room temperature under Ar atmosphere for 8 h. After 8 h, the reaction was quenched by H<sub>2</sub>O, extracted by EtOAc, dried over anhydrous sodium sulfate, concentrated in vacuo, and the residue was purified by column chromatography to afford the product **6**.

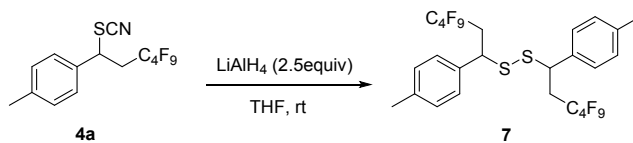

**4a** (0.2 mmol, 79.1 mg) and LiAlH<sub>4</sub> (0.5 mmol, 19 mg) were added into the solution of THF (5 ml) in a 10 ml round bottom flask equipped with a stir bar at room temperature for 5 h. After 5 h, the reaction was concentrated in vacuo and the residue was purified by column chromatography to afford the product **7**.

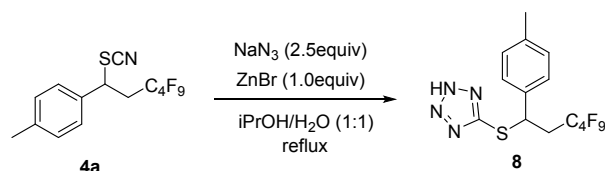

**4a** (0.2 mmol, 79.1 mg),  $\text{NaN}_3$  (0.5 mmol, 32.4 mg) and  $\text{ZnBr}$  (0.2 mmol, 45 mg) were dissolved in  $\text{iPrOH}/\text{H}_2\text{O}$  (1:1, 10 ml) in 25 ml round bottom flask equipped with a stir bar at room temperature under Ar atmosphere, and then refluxed for 8 h. After 8 h, the reaction was cooled to room temperature, concentrated in vacuo and the residue was purified by column chromatography to afford the product **8**.

## 5. The Mechanistic Study.

### 5.1 Radical Trapping Experiments.

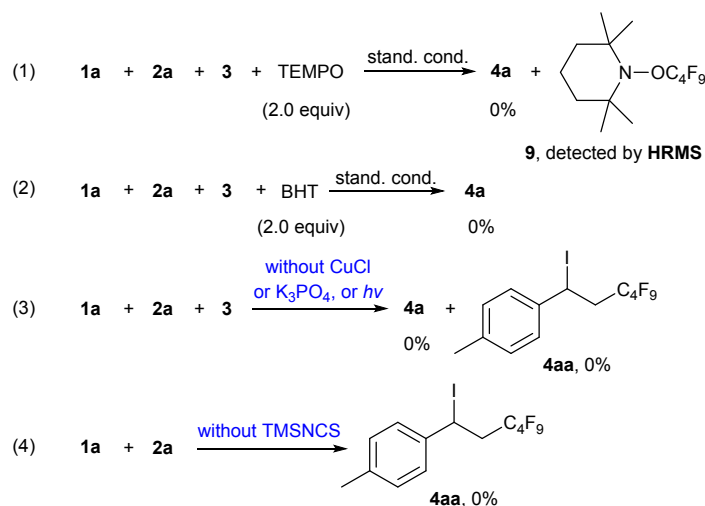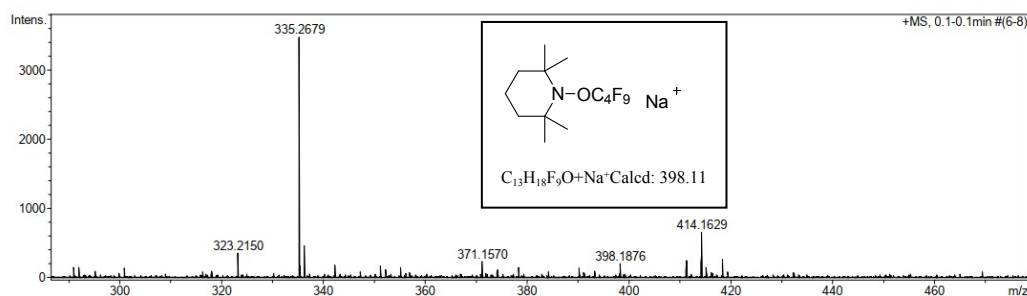

**Discussion:** In order to gain some mechanistic insights, radical trapping experiments were carried out. The reaction was completely shut down by 2,2,6,6-tetramethylpiperidin-1-oxyl (TMEPO) and butylated hydroxytoluene (BHT), respectively (eqns 1 and 2). Notably, when TMEPO was added, the radical trapping product **9** was detected by HRMS, which indicated the formation of fluoroalkyl radical (eqn 1). These results suggested that a radical pathway might be involved. The

control experiment showed that no desired product **4a** was detected without CuCl, K<sub>3</sub>PO<sub>4</sub>, or light irradiation (Table 1, entries 15-17), indicating that the Cu salt, K<sub>3</sub>PO<sub>4</sub>, and light were all indispensable for the reaction. Furthermore, when the reaction was carried out in the absence of TMSNCS, the iodofluoroalkylation product (**4aa**) was not detected, which suggested that the ATRA pathway might not be involved in the aromatic alkenes reaction.

## 5.2 UV-Vis absorption experiment

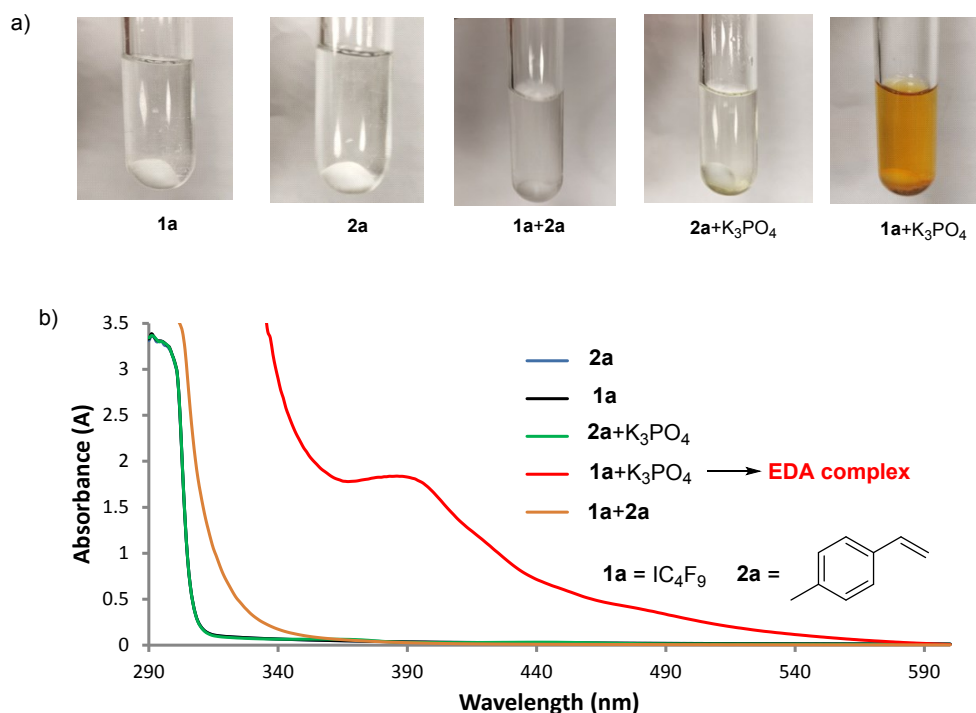

**Figure S1.** a) 0.1 M for each species in CH<sub>3</sub>CN. Images showed the appearance of a yellow color upon the mixing of IC<sub>4</sub>F<sub>9</sub> (**1a**) with K<sub>3</sub>PO<sub>4</sub>. b) UV-vis absorption spectra of the substrates in CH<sub>3</sub>CN at concentrations of 0.1 M.

**Discussion:** We first tested the -PO<sub>4</sub><sup>3-</sup> anion for its ability to induce the formation of an EDA complex with perfluorobutyl iodide (IC<sub>4</sub>F<sub>9</sub>, **1a**) by UV/vis absorption spectroscopy. When K<sub>3</sub>PO<sub>4</sub> and **1a** were mixed in CH<sub>3</sub>CN and stirred at room temperature for 1 h, an obviously yellow color was appeared (Scheme 1a). Meanwhile, the optical absorption spectrum of the mixture showed a significant bathochromic shift to visible spectral region, and a new absorption peak ( $\lambda_{\max}$ ) appeared at about 390nm (Scheme 1b). Under the same conditions, the mixture of **2a** and K<sub>3</sub>PO<sub>4</sub> (**2a**+K<sub>3</sub>PO<sub>4</sub>) or **1a** and **2a** (**1a**+**2a**) did not show bathochromic shift. These results suggested that the combination of K<sub>3</sub>PO<sub>4</sub> and IC<sub>4</sub>F<sub>9</sub> formed a new photoactive EDA complex.

### 5.3 Proposed mechanism.

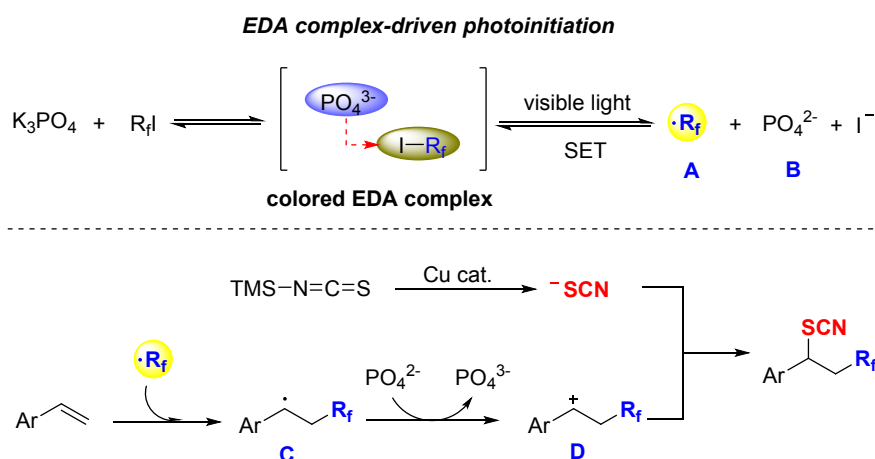

**Figure S2.** Proposed mechanism for aryl alkenes.

**Discussion:** Based on the mechanistic investigations and previous reports,<sup>1</sup> a plausible mechanism was proposed (Figure S2). Firstly,  $K_3PO_4$  and  $IR_f$  generate the colored EDA complex. Then, a visible-light-promoted electron transfer leads to the formation of the electron-deficient fluoroalkyl radical **A** through the reductive cleavage of the C–I bond within  $R_fI$  and  $K_3PO_4$ . The electrophilic fluoroalkyl radical is next trapped by the alkene and forms the benzylic intermediate **C**, which oxidized by  $PO_4^{2-}$  anion **B** to generate the carbocation species **D**, the carbocation intermediate **D** attracted by nucleophilic SCN<sup>-</sup> anion to yield the desired product.

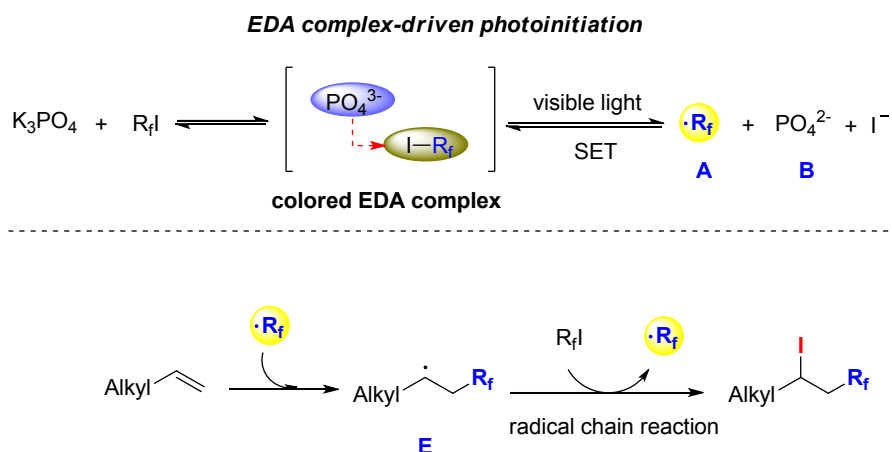

**Figure S3.** Proposed mechanism for unactivated alkenes.

**Discussion:** For unactivated alkenes (Figure S3), firstly,  $K_3PO_4$  and  $IR_f$  generate the colored EDA complex. Then, a visible-light-promoted electron transfer leads to the formation of the electron-deficient fluoroalkyl radical **A** through the reductive cleavage of the C–I bond within  $R_fI$  and  $K_3PO_4$ . The electrophilic fluoroalkyl radical is next trapped by the alkyl alkene and forms the

radical intermediate **E**, which would undergo a radical chain mechanism and obtain the iodoperfluoroalkylation product through ATRA pathway.<sup>2</sup>

#### 5.4 Measurement the wavelength of the LED light.

We also measured the wavelength of the LED light by ourselves (recorded on an AVANTES® AvaSpec-ULS2048 spectrometer instrument). The result was shown as follow:

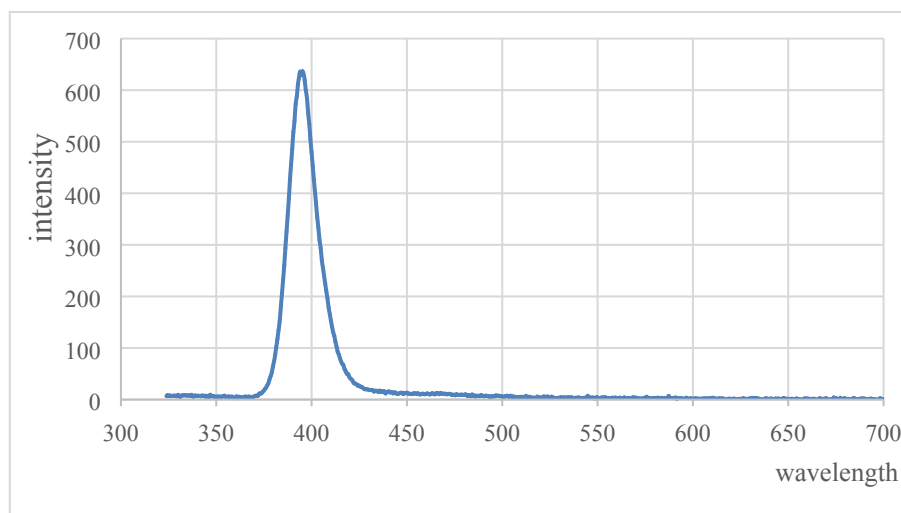

## 6. References.

- (1) (a) R. Foster, Electron donor-acceptor complexes, *J. Phys. Chem.*, 1980, **84**, 2135. (b) S. V. Rosokha, and J. K. Kochi, Fresh look at electron-transfer mechanisms via the donor/acceptor bindings in the critical encounter complex, *Acc. Chem. Res.*, 2008, **41**, 641. (c) C. G. S. Lima, T. de M. Lima, M. Duarte, I. D. Jurberg, M. W. Paixão, Organic synthesis enabled by light-irradiation of EDA complexes: theoretical background and synthetic applications, *ACS Catal.*, 2016, **6**, 1389. (d) S. V. Rosokha, J. K. Kochi, Fresh look at electron-transfer mechanisms via the donor/acceptor bindings in the critical encounter complex, *Acc. Chem. Res.*, 2008, **41**, 641. (e) G. E. M. Crisenza, D. Mazzarella, and P. Melchiorre, Synthetic methods driven by the photoactivity of electron donor-acceptor complexes, *J. Am. Chem. Soc.*, 2020, **142**, 5461.
- (2) (a) C. -J. Wallentin, J. D. Nguyen, P. Finkbeiner, C. R. J. Stephenson, Visible light-mediated atom transfer radical addition via oxidative and reductive quenching of photocatalysts, *J. Am. Chem. Soc.*, 2012, **134**, 8875; (b) R. Beniazza, R. Atkinson, C. Absalon, F. Castet, S. A. Denisov, N. D. McClenaghan, D. Lastécouerès, J.-M. Vincent, Benzophenone vs. copper/benzophenone in light-promoted atom transfer radical additions (ATRA): highly effective iodoperfluoroalkylation of alkenes/alkynes and mechanistic studies, *Adv. Synth. Catal.* 2016, **358**, 2949; (c) Y. Wang, J. Wang, G.-X. Li, G. He, Chen, G. Halogen-bond-promoted photoactivation of perfluoroalkyl iodides: a photochemical protocol for perfluoroalkylation reactions, *Org. Lett.*, 2017, **19**, 1442.



## 7. Characterization of products

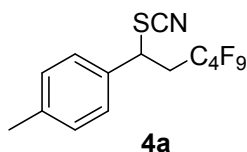

**1-methyl-4-(3,3,4,4,5,5,6,6,6-nonafluoro-1-thiocyanatohexyl)benzene**, 67.2 mg, yield:85%, light yellow liquid.  $^1\text{H NMR}$  (300 MHz,  $\text{CDCl}_3$ )  $\delta$  7.20–7.29 (m, 4H), 4.77 (dd,  $J = 6.0$  Hz, 7.8Hz, 1H), 2.92–3.12 (m, 2H), 2.37 (s, 3H);  $^{13}\text{C NMR}$  (75 MHz,  $\text{CDCl}_3$ )  $\delta$  139.90, 133.40, 130.10, 127.05, 110.42, 45.29, 36.56 (t,  $J = 21.0$  Hz), 21.17;  $^{19}\text{F NMR}$  (282 MHz,  $\text{CDCl}_3$ )  $\delta$  -81.05— -81.14 (m, 3F), -111.85— -114.27 (m, 2F), -124.23— -124.29 (m, 2F), -125.92— -126.03 (m, 2F); **HRMS (EI)**:  $\text{C}_{14}\text{H}_{10}\text{F}_9\text{NS}+\text{Na}^+$  Calcd: 418.0288, Found: 418.0276.

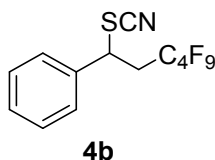

**(3,3,4,4,5,5,6,6,6-nonafluoro-1-thiocyanatohexyl)benzene**, 67.9 mg, yield:89%, yellow liquid.  $^1\text{H NMR}$  (300 MHz,  $\text{CDCl}_3$ )  $\delta$  7.37–7.45 (m, 5H), 4.77 (dd,  $J = 6.3$  Hz, 8.1Hz, 1H), 2.95–3.12 (m, 2H);  $^{13}\text{C NMR}$  (75 MHz,  $\text{CDCl}_3$ )  $\delta$  136.46, 129.76, 129.48, 127.16, 110.25, 45.31, 36.42 (d,  $J = 21.0$  Hz);  $^{19}\text{F NMR}$  (282 MHz,  $\text{CDCl}_3$ )  $\delta$  -81.03 (m, 3F), -111.88— -112.93 (m, 1F), -113.11— -114.15 (m, 1F), -124.23 (dd,  $J = 3.1$  Hz, 7.3Hz 2F), -125.94 (d,  $J = 3.7$  Hz 2F); **HRMS (EI)**:  $\text{C}_{13}\text{H}_8\text{F}_9\text{NS}+\text{Na}^+$  Calcd: 404.0131, Found: 404.0145.

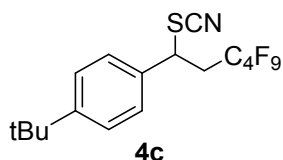

**1-(tert-butyl)-4-(3,3,4,4,5,5,6,6,6-nonafluoro-1-thiocyanatohexyl)benzene**, 76.1 mg, yield:87%, white solid, mp 43–45°C.  $^1\text{H NMR}$  (300 MHz,  $\text{CDCl}_3$ )  $\delta$  7.43 (d,  $J = 8.4$  Hz, 2H), 7.26–7.32 (m, 2H), 4.77 (t,  $J = 6.9$  Hz, 1H), 2.95–3.11 (m, 2H), 1.32 (s, 9H);  $^{13}\text{C NMR}$  (75 MHz,  $\text{CDCl}_3$ )  $\delta$  152.97, 133.37, 126.82, 126.40, 110.51, 45.14, 36.55, 34.77, 31.17;  $^{19}\text{F NMR}$  (282 MHz,  $\text{CDCl}_3$ )  $\delta$  -81.03— -81.11 (m, 3F), -112.95— -112.23 (m, 2F), -124.17— -124.44 (m, 2F), -125.68— -126.03 (m, 2F); **HRMS (EI)**:  $\text{C}_{17}\text{H}_{16}\text{F}_9\text{NS}+\text{Na}^+$  Calcd: 460.0757, Found: 460.0758.

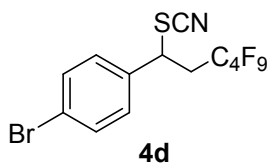

**1-bromo-4-(3,3,4,4,5,5,6,6,6-nonafluoro-1-thiocyanatohexyl)benzene**, 72.7 mg, yield:79%, yellow liquid.  $^1\text{H NMR}$  (300 MHz,  $\text{CDCl}_3$ )  $\delta$  7.57 (d,  $J = 8.7$  Hz, 2H), 7.27 (d,  $J = 8.4$  Hz, 2H), 4.75 (dd,  $J = 6.6$  Hz, 7.8 Hz, 1H), 2.92–3.08 (m, 2H);  $^{13}\text{C NMR}$  (75 MHz,  $\text{CDCl}_3$ )  $\delta$  135.53, 132.72, 128.77, 124.00, 109.78, 44.65, 36.42 (t,  $J = 21.0$  Hz);  $^{19}\text{F NMR}$  (282 MHz,  $\text{CDCl}_3$ )  $\delta$  -80.95— -81.03 (m, 3F), -111.61— -114.04 (m, 2F), -124.13— -124.20 (m, 2F), -125.86— -125.97 (m, 2F); **HRMS (EI)**:  $\text{C}_{13}\text{H}_7\text{BrF}_9\text{NS}+\text{Na}^+$  Calcd:481.9237, Found: 481.9321.

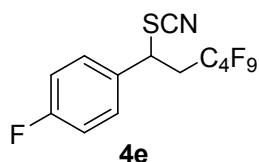

**1-fluoro-4-(3,3,4,4,5,5,6,6,6-nonafluoro-1-thiocyanatohexyl)benzene**, 66.2 mg, yield:83%, yellow liquid.  $^1\text{H NMR}$  (300 MHz,  $\text{CDCl}_3$ )  $\delta$  7.35–7.39 (m, 2H), 7.08–7.17 (m, 2H), 4.78 (dd,  $J = 6.6$  Hz, 7.8 Hz, 1H), 2.93–3.09 (m, 2H);  $^{13}\text{C NMR}$  (75 MHz,  $\text{CDCl}_3$ )  $\delta$  163.17 (d,  $J = 249.0$  Hz), 132.34 (d,  $J = 3.0$  Hz), 129.13 (d,  $J = 8.3$  Hz), 116.74 (t,  $J = 10.5$  Hz), 109.98, 44.60, 36.61 (t,  $J = 21.0$  Hz);  $^{19}\text{F NMR}$  (282 MHz,  $\text{CDCl}_3$ )  $\delta$  -81.01— -81.11 (m, 3F), -110.56 (s, 1F), -110.68— -113.22 (m, 1F), -114.08— -114.19 (m, 1F), -124.18— -124.29 (m, 2F), -125.90— -126.02 (m, 2F); **HRMS (EI)**:  $\text{C}_{13}\text{H}_7\text{F}_{10}\text{NS}+\text{Na}^+$  Calcd: 422.0037, Found: 422.0042.

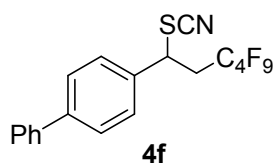

**4-(3,3,4,4,5,5,6,6,6-nonafluoro-1-thiocyanatohexyl)-1,1'-biphenyl**, 70.4 mg, yield:77%, yellow solid, mp 84–88°C.  $^1\text{H NMR}$  (300 MHz,  $\text{CDCl}_3$ )  $\delta$  7.57–7.63 (m, 4H), 7.43–7.48 (m, 4H), 7.34–7.41 (m, 1H), 4.82 (dd,  $J = 6.3$  Hz, 7.5 Hz, 1H), 2.93–3.21 (m, 2H);  $^{13}\text{C NMR}$  (75 MHz,  $\text{CDCl}_3$ )  $\delta$  142.68, 139.82, 135.31, 128.93, 128.10, 127.94, 127.62, 127.13, 110.30, 45.16, 36.53 (t,  $J = 21.0$  Hz);  $^{19}\text{F NMR}$  (282 MHz,  $\text{CDCl}_3$ )  $\delta$  -81.01 (m, 3F), -111.71— -112.80 (s, 1F), -113.05— -114.12 (m, 1F), -124.18 (t,  $J = 2.8$  Hz, 2F), -125.90 (d,  $J = 3.7$  Hz); **HRMS (EI)**:  $\text{C}_{19}\text{H}_{12}\text{F}_9\text{NS}+\text{Na}^+$  Calcd: 480.0444, Found: 480.0454.

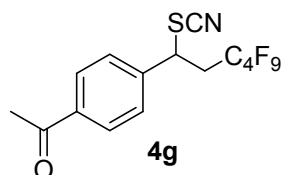

**1-(4-(3,3,4,4,5,5,6,6,6-nonafluoro-1-thiocyanatohexyl)phenyl)ethan-1-one**, 72.8 mg, yield:86%, white solid, mp 46–49°C.  $^1\text{H NMR}$  (300 MHz,  $\text{CDCl}_3$ )  $\delta$  8.03 (d,  $J = 8.4$  Hz, 2H), 7.52 (d,  $J = 8.1$  Hz, 2H), 4.82 (t,  $J = 6.6$  Hz, 1H), 2.97–3.11 (m, 2H), 2.63 (s, 3H);  $^{13}\text{C NMR}$  (75 MHz,  $\text{CDCl}_3$ )

$\delta$  196.99, 141.39, 137.96, 129.39, 127.52, 109.67, 44.60, 36.24 (t,  $J = 21.0$  Hz), 26.64;  **$^{19}\text{F}$  NMR** (282 MHz,  $\text{CDCl}_3$ )  $\delta$  -80.03— -81.11 (m, 3F), -111.61— -114.01 (m, 2F), -124.16— -124.25 (m, 2F), -125.92— -126.03 (m, 2F); **HRMS (EI):**  $\text{C}_{15}\text{H}_{10}\text{F}_9\text{NOS}+\text{Na}^+$  Calcd: 446.0237, Found: 446.0232.

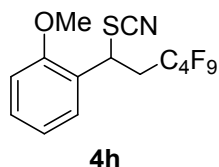

**1-methoxy-2-(3,3,4,4,5,5,6,6,6-nonafluoro-1-thiocyanatohexyl)benzene**, 69.1 mg, yield:84%, yellow liquid.  **$^1\text{H}$  NMR** (300 MHz,  $\text{CDCl}_3$ )  $\delta$  7.28–7.38 (m, 2H), 6.93–7.04 (m, 2H), 5.08 (dd,  $J = 6.3$  Hz, 7.8 Hz, 1H), 3.91 (s, 3H), 2.90–3.24 (m, 2H);  **$^{13}\text{C}$  NMR** (75 MHz,  $\text{CDCl}_3$ )  $\delta$  156.37, 135.19, 130.84, 127.91, 124.85, 121.05, 111.29, 55.91, 40.83, 35.48 (t,  $J = 21.0$  Hz);  **$^{19}\text{F}$  NMR** (282 MHz,  $\text{CDCl}_3$ )  $\delta$  -80.96— -81.06 (m, 3F), -113.60— -113.83 (s, 2F), -124.27— -124.38 (m, 2F), -125.85— -125.98 (m, 2F); **HRMS (EI):**  $\text{C}_{14}\text{H}_{10}\text{F}_9\text{NOS}+\text{Na}^+$  Calcd: 434.0237, Found: 434.0247.

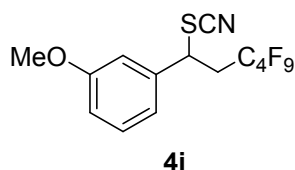

**1-methoxy-3-(3,3,4,4,5,5,6,6,6-nonafluoro-1-thiocyanatohexyl)benzene**, 67.4 mg, yield:83%, yellow liquid.  **$^1\text{H}$  NMR** (300 MHz,  $\text{CDCl}_3$ )  $\delta$  7.34 (t,  $J = 7.8$  Hz, 1H), 6.89–6.98 (m, 3H), 4.73 (dd,  $J = 6.3$  Hz, 7.8 Hz, 1H), 3.83 (s, 3H), 2.88–3.16 (m, 2H);  **$^{13}\text{C}$  NMR** (75 MHz,  $\text{CDCl}_3$ )  $\delta$  160.14, 137.92, 130.59, 119.21, 114.85, 113.07, 110.32, 55.35, 45.26, 36.58 (t,  $J = 21.0$  Hz);  **$^{19}\text{F}$  NMR** (282 MHz,  $\text{CDCl}_3$ )  $\delta$  -81.01— -81.11 (m, 3F), -111.98— -113.26 (s, 1F), -114.15— -114.27 (m, 1F), -124.19— -124.30 (m, 2F), -125.88— -126.06 (m, 2F); **HRMS (EI):**  $\text{C}_{14}\text{H}_{10}\text{F}_9\text{NOS}+\text{Na}^+$  Calcd: 434.0237, Found: 434.0245.

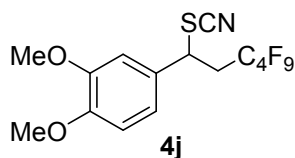

**1,2-dimethoxy-4-(3,3,4,4,5,5,6,6,6-nonafluoro-1-thiocyanatohexyl)benzene**, 64.1 mg, yield:73%, white solid, mp 50—54°C.  **$^1\text{H}$  NMR** (300 MHz,  $\text{CDCl}_3$ )  $\delta$  6.89 (s, 2H), 6.84 (s, 1H), 5.16 (dd,  $J = 3.6$  Hz, 9.6 Hz, 1H), 3.91 (d,  $J = 9.6$  Hz, 6H), 2.41–2.86 (m, 2H);  **$^{13}\text{C}$  NMR** (75 MHz,  $\text{CDCl}_3$ )  $\delta$  149.60, 149.56, 135.70, 130.24, 118.21, 111.37, 108.56, 55.98 (d,  $J = 4.5$  Hz), 54.09,

39.18(t,  $J = 21.0$  Hz), 18.37;  $^{19}\text{F}$  NMR (282 MHz,  $\text{CDCl}_3$ )  $\delta$  -81.05— -81.13 (m, 3F), -113.15— -115.40 (m, 2F), -124.40— -124.52 (m, 2F), -125.90— -126.02 (m, 2F); **HRMS (EI)**: $\text{C}_{15}\text{H}_{12}\text{F}_9\text{NO}_2\text{S}+\text{Na}^+$ Calcd: 464.0343, Found: 464.0337.

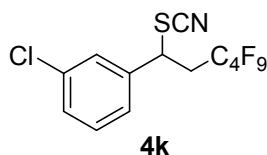

**1-chloro-3-(3,3,4,4,5,5,6,6,6-nonafluoro-1-thiocyanatohexyl)benzene**, 73.1 mg, yield:88%, yellow liquid.  $^1\text{H}$  NMR (300 MHz,  $\text{CDCl}_3$ )  $\delta$  7.35–7.42 (m, 3H), 7.26–7.31 (m, 1H), 4.72 (t,  $J = 7.2$  Hz, 1H), 2.92–3.08 (m, 2H);  $^{13}\text{C}$  NMR (75 MHz,  $\text{CDCl}_3$ )  $\delta$  138.48, 135.38, 130.78, 130.04, 127.39, 125.33, 109.71, 44.54, 36.45 (t,  $J = 21.0$  Hz);  $^{19}\text{F}$  NMR (282 MHz,  $\text{CDCl}_3$ )  $\delta$  -80.95— -81.04 (m, 3F), -113.73— -114.01 (m, 2F), -124.10— -124.18 (m, 2F), -125.86— -125.97 (m, 2F); **HRMS (EI)**: $\text{C}_{13}\text{H}_7\text{ClF}_9\text{NS}+\text{Na}^+$ Calcd: 437.9742, Found: 437.9736.

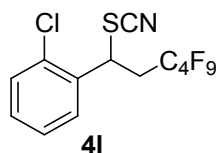

**1-chloro-2-(3,3,4,4,5,5,6,6,6-nonafluoro-1-thiocyanatohexyl)benzene**, 71.5 mg, yield:86%, yellow liquid.  $^1\text{H}$  NMR (300 MHz,  $\text{CDCl}_3$ )  $\delta$  7.45–7.50 (m, 2H), 7.35–7.41 (m, 2H), 5.24 (t,  $J = 7.2$  Hz, 1H), 3.00–3.14 (m, 2H);  $^{13}\text{C}$  NMR (75 MHz,  $\text{CDCl}_3$ )  $\delta$  134.10, 133.27, 130.72, 130.55, 127.81, 109.82, 41.02, 35.58 (t,  $J = 21.0$  Hz);  $^{19}\text{F}$  NMR (282 MHz,  $\text{CDCl}_3$ )  $\delta$  -80.95— -81.04 (m, 3F), -113.25 (d,  $J = 11.6$  Hz, 2F), -124.19— -124.28 (m, 2F), -125.85— -125.96 (m, 2F); **HRMS (EI)**: $\text{C}_{13}\text{H}_7\text{ClF}_9\text{NS}+\text{Na}^+$ Calcd: 437.9742, Found: 437.9736.

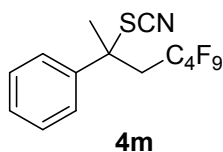

**(4,4,5,5,6,6,7,7,7-nonafluoro-2-thiocyanatoheptan-2-yl)benzene**, 51.3 mg, yield:65%, yellow liquid.  $^1\text{H}$  NMR (300 MHz,  $\text{CDCl}_3$ )  $\delta$  7.50–7.54 (m, 2H), 7.39–7.46 (m, 3H), 3.29–3.46 (m, 1H), 2.90–3.08 (m, 1H), 2.28 (s, 3H);  $^{13}\text{C}$  NMR (75 MHz,  $\text{CDCl}_3$ )  $\delta$  138.21, 129.32, 129.16, 125.91, 110.60, 56.31, 41.77 (t,  $J = 19.5$  Hz), 26.65 (d,  $J = 4.5$  Hz);  $^{19}\text{F}$  NMR (282 MHz,  $\text{CDCl}_3$ )  $\delta$  -81.06 (s, 3F), -108.28— -109.36 (m, 1F), -111.97— -113.03 (m, 1F), -124.32— -124.37 (m, 2F), -125.67— -125.80 (m, 2F); **HRMS (EI)**: $\text{C}_{14}\text{H}_{10}\text{F}_9\text{NS}+\text{Na}^+$ Calcd: 418.0361, Found: 418.0363.

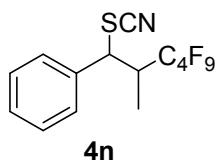

**(3,3,4,4,5,5,6,6,6-nonafluoro-2-methyl-1-thiocyanatohexyl)benzene**, 59.3 mg, yield:75%, white liquid.  $^1\text{H NMR}$  (300 MHz,  $\text{CDCl}_3$ )  $\delta$  7.30–7.37 (m, 5H), 4.90 (d,  $J = 3.9$  Hz, 1H), 2.86–3.01 (m, 2H), 1.28 (d,  $J = 7.2$  Hz, 3H);  $^{13}\text{C NMR}$  (75 MHz,  $\text{CDCl}_3$ )  $\delta$  136.45, 128.24, 128.13, 128.00, 126.60, 109.62, 51.35 (d,  $J = 5.3$  Hz), 41.02 (t,  $J = 20.3$  Hz), 8.29 (d,  $J = 4.5$  Hz);  $^{19}\text{F NMR}$  (282 MHz,  $\text{CDCl}_3$ )  $\delta$  -80.89 (t,  $J = 95.9$  Hz 3F), -111.25— -112.41 (m, 1F), -116.43— -117.56 (m, 1F), -120.95— -122.33 (m, 2F), -124.58— -127.42 (m, 2F); **HRMS (EI)**: $\text{C}_{13}\text{H}_7\text{ClF}_9\text{NS}+\text{Na}^+$ Calcd: 418.0288, Found: 418.0282.

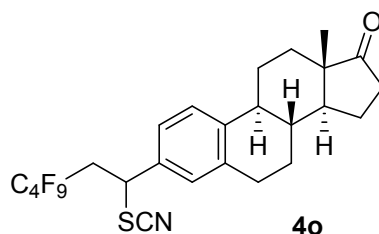

**(8R,9S,13S,14S)-13-methyl-3-(3,3,4,4,5,5,6,6,6-nonafluoro-1-thiocyanatohexyl)-6,7,8,9,11,12,13,14,15,16-decahydro-17H-cyclopenta[a]phenanthren-17-one**, 94.8 mg, yield:85%, white liquid.  $^1\text{H NMR}$  (300 MHz,  $\text{CDCl}_3$ )  $\delta$  7.33 (d,  $J = 8.1$  Hz, 1H), 7.09–7.17 (m, 2H), 4.74 (t,  $J = 6.9$  Hz, 1H), 2.93–3.11 (m, 4H), 1.96–2.57 (m, 7H), 1.43–1.72 (m, 6H), 1.40 (s, 3H);  $^{13}\text{C NMR}$  (75 MHz,  $\text{CDCl}_3$ )  $\delta$  141.62, 137.85, 133.87, 127.67 (d,  $J = 5.3$  Hz), 126.46, 124.33 (d,  $J = 4.5$  Hz), 110.49, 50.46, 47.91, 45.17, 44.34, 37.82, 36.76, 36.53, 36.23, 35.81, 31.52, 29.31, 26.24, 25.53, 21.56, 13.80;  $^{19}\text{F NMR}$  (282 MHz,  $\text{CDCl}_3$ )  $\delta$  -80.98— -81.06 (m, 3F), -111.96— -114.18 (m, 2F), -124.17— -124.27 (m, 2F), 125.86— -125.97 (m, 2F); **HRMS (EI)**: $\text{C}_{25}\text{H}_{24}\text{F}_9\text{NOS}+\text{Na}^+$ Calcd: 580.1333, Found: 580.1327.

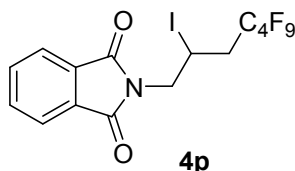

**2-(4,4,5,5,6,6,8,8,8-nonafluoro-2-iodooctyl)isoindoline-1,3-dione**, 72.5 mg, yield:68%, yellow liquid,  $^1\text{H NMR}$  (300 MHz,  $\text{CDCl}_3$ )  $\delta$  7.89–7.92 (m, 2H), 7.76–7.80 (m, 2H), 4.67–4.78 (m, 1H), 4.18 (dd,  $J = 8.7$  Hz, 5.4 Hz, 1H), 3.99 (dd,  $J = 6.9$  Hz, 7.5 Hz, 1H), 2.84–3.02 (m, 2H);  $^{13}\text{C NMR}$  (75 MHz,  $\text{CDCl}_3$ )  $\delta$  167.65, 134.43, 131.56, 123.71, 45.83 (d,  $J = 2.3$  Hz), 39.25 (d,  $J = 21.8$  Hz), 13.14;  $^{19}\text{F NMR}$  (282 MHz,  $\text{CDCl}_3$ )  $\delta$  -81.07 — -81.15 (m, 3F), -111.78— -114.66 (m, 2F), -

124.44—124.55 (m, 2F), -125.59—126.07 (m, 2F); **HRMS (EI)**: C<sub>15</sub>H<sub>9</sub>F<sub>9</sub>INO<sub>2</sub>+Na<sup>+</sup>Calcd: 555.9432, Found: 555.9426.

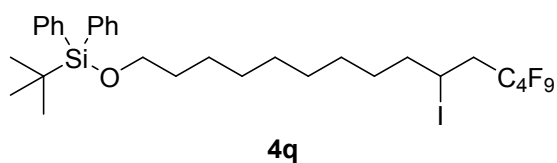

**tert-butyl((12,12,13,13,14,14,15,15,15-nonafluoro-10-iodopentadecyl)oxy)diphenylsilane,**

113.2 mg, yield:75%, yellow liquid, **<sup>1</sup>H NMR** (300 MHz, CDCl<sub>3</sub>) δ 7.79–7.92 (m, 1H), 7.50–7.71 (m, 4H), 7.20–7.44 (m, 5H), 4.28–4.38 (m, 1H), 3.67 (t, *J* = 6.6 Hz, 2H), 2.69–2.97 (m, 2H), 1.71–1.85 (m, 2H), 1.52–1.60 (m, 3H), 1.28–1.36 (m, 11H), 1.06 (s, 9H); **<sup>13</sup>C NMR** (75 MHz, CDCl<sub>3</sub>) δ 135.62, 135.52, 134.21, 129.92, 129.50, 127.83, 127.78, 127.59, 64.08 (d, *J* = 12.0 Hz), 41.61 (t, *J* = 20.3 Hz), 40.35, 32.55 (d, *J* = 6.0 Hz), 29.75, 29.61, 29.50, 29.32, 28.51 (d, *J* = 1.5 Hz), 26.76 (t, *J* = 8.3 Hz), 25.76 (d, *J* = 1.5 Hz), 20.76, 19.22 (d, *J* = 3.8 Hz) **<sup>19</sup>F NMR** (282 MHz, CDCl<sub>3</sub>) δ -81.10— -81.17 (m, 3F), -111.27— -115.53 (m, 2F), -122.75— -124.66 (m, 2F), -125.63— -126.08 (m, 2F); **HRMS (EI)**: C<sub>31</sub>H<sub>40</sub>F<sub>9</sub>IOSi+Na<sup>+</sup>Calcd: 777.1647, Found: 777.1642.

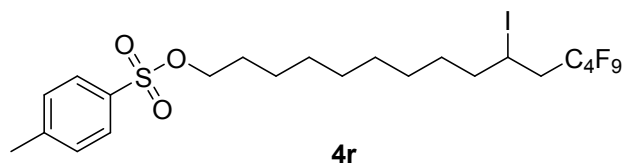

**12,12,13,13,14,14,15,15,15-nonafluoro-10-iodopentadecyl 4-methylbenzenesulfonate,** 95.2 mg, yield:71%, yellow liquid, **<sup>1</sup>H NMR** (300 MHz, CDCl<sub>3</sub>) δ 7.72 (d, *J* = 8.1 Hz, 2H), 7.28 (d, *J* = 8.1 Hz, 2H), 4.20–4.30 (m, 1H), 3.95 (t, *J* = 6.3 Hz, 2H), 2.62–2.93 (m, 2H), 2.38 (s, 3H), 1.66–1.77 (m, 2H), 1.51–1.59(m, 3H), 1.17–1.22(m, 11H); **<sup>13</sup>C NMR** (75 MHz, CDCl<sub>3</sub>) δ 144.64, 133.20, 129.80, 127.88, 70.66, 41.53 (t, *J* = 19.5 Hz), 40.25, 29.52, 29.24, 29.19, 28.85, 28.80, 28.42, 25.30, 21.63, 20.83; **<sup>19</sup>F NMR** (282 MHz, CDCl<sub>3</sub>) δ -80.99— -81.06 (m, 3F), -111.43— -112.51 (m, 1F), -114.42— -115.48 (m, 1F), -124.53— -124.65 (m, 2F), -125.85— -126.00(m, 2F); **HRMS (EI)**: C<sub>22</sub>H<sub>28</sub>F<sub>9</sub>IO<sub>3</sub>S+Na<sup>+</sup>Calcd: 693.0558, Found: 693.0552.

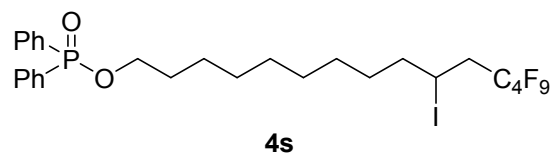

**12,12,13,13,14,14,15,15,15-nonafluoro-10-iodopentadecyl diphenylphosphinate,** 108.9 mg, yield:76%, yellow liquid, **<sup>1</sup>H NMR** (300 MHz, CDCl<sub>3</sub>) δ 7.78–7.86 (m, 4H), 7.28–7.55 (m, 6H), 4.30–4.36 (m, 1H), 4.03 (q, *J* = 6.6 Hz, 2H), 2.75–2.95 (m, 2H), 1.68–1.85 (m, 3H), 1.35–1.54 (m, 2H), 1.29 (s, 11H); **<sup>13</sup>C NMR** (75 MHz, CDCl<sub>3</sub>) δ 132.58, 132.08, 132.04, 131.68, 131.55, 130.77,

128.57, 128.40, 64.96 (d,  $J = 6.0$  Hz), 41.50 (t,  $J = 21.0$  Hz), 40.26, 30.51 (d,  $J = 6.0$  Hz), 29.52, 29.32, 29.24, 29.04, 28.43, 25.56, 20.78;  $^{19}\text{F}$  NMR (282 MHz,  $\text{CDCl}_3$ )  $\delta$  -81.05— -81.12 (m, 3F), -111.52— -112.58 (m, 1F), -114.43— -115.49 (m, 1F), -124.61— -124.68 (m, 2F), -125.93— -126.03 (m, 2F); **HRMS (EI)**:  $\text{C}_{27}\text{H}_{31}\text{F}_9\text{IO}_2\text{P}+\text{Na}^+$  Calcd: 739.0860, Found: 739.0855.

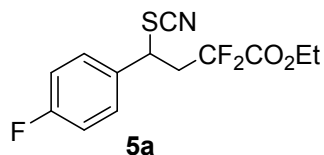

**ethyl 2,2-difluoro-4-(4-fluorophenyl)-4-thiocyanatobutanoate**, 52.2 mg, yield:86%, yellow liquid.  $^1\text{H}$  NMR (300 MHz,  $\text{CDCl}_3$ )  $\delta$  7.34–7.39(m, 2H), 7.07–7.13(m, 2H), 4.69 (dd,  $J = 6.3$  Hz, 2.1 Hz, 1H), 4.17 (q,  $J = 7.2$  Hz, 2H), 2.88–3.14 (m, 2H), 1.30 (t,  $J = 6.9$  Hz, 3H);  $^{13}\text{C}$  NMR (75 MHz,  $\text{CDCl}_3$ )  $\delta$  164.75, 162.81, 161.44, 132.46 (d,  $J = 3.0$  Hz), 129.46 (d,  $J = 8.3$  Hz), 116.36 (d,  $J = 21.8$  Hz), 113.84, 110.26, 63.49, 45.53 (d,  $J = 4.5$  Hz), 40.20 (t,  $J = 24.0$  Hz);  $^{19}\text{F}$  NMR (282 MHz,  $\text{CDCl}_3$ )  $\delta$  -102.89 (dd,  $J = 266.8$  Hz, 252.6 Hz, 2F), -110.77 (s, 1F); **HRMS (EI)**:  $\text{C}_{13}\text{H}_{12}\text{F}_3\text{NS}+\text{Na}^+$  Calcd: 326.0439, Found: 326.0433.

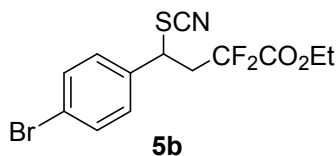

**ethyl 4-(4-bromophenyl)-2,2-difluoro-4-thiocyanatobutanoate**, 61.9 mg, yield:85%, yellow liquid.  $^1\text{H}$  NMR (300 MHz,  $\text{CDCl}_3$ )  $\delta$  7.55 (d,  $J = 8.7$  Hz, 2H), 7.25 (d,  $J = 7.8$  Hz, 2H), 4.65 (dd,  $J = 6.3$  Hz, 1.8 Hz, 1H), 4.18 (q,  $J = 7.2$  Hz, 2H), 2.92–3.07 (m, 2H), 1.31(t,  $J = 7.2$  Hz, 3H);  $^{13}\text{C}$  NMR (75 MHz,  $\text{CDCl}_3$ )  $\delta$  135.69, 132.47, 129.10, 123.77, 110.99, 63.55, 45.57 (t,  $J = 4.5$  Hz), 39.94 (t,  $J = 24.0$  Hz), 13.79;  $^{19}\text{F}$  NMR (282 MHz,  $\text{CDCl}_3$ )  $\delta$  -102.97 (dd,  $J = 265.1$  Hz, 160.7 Hz, 2F); **HRMS (EI)**:  $\text{C}_{13}\text{H}_{12}\text{BrF}_2\text{NO}_2\text{S}+\text{Na}^+$  Calcd: 385.9638, Found: 385.9632

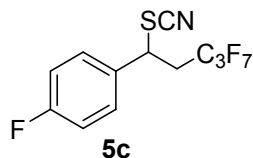

**1-fluoro-4-(3,3,4,4,5,5,5-heptafluoro-1-thiocyanatopentyl)benzene**, 62.2 mg, yield:89%, yellow liquid.  $^1\text{H}$  NMR (300 MHz,  $\text{CDCl}_3$ )  $\delta$  7.34–7.39 (m, 2H), 7.09–7.15 (m, 2H), 4.79 (dd,  $J = 4.8$  Hz, 4.2Hz, 1H), 2.88–3.17 (m, 2H);  $^{13}\text{C}$  NMR (75 MHz,  $\text{CDCl}_3$ )  $\delta$  163.17 (d,  $J = 248.3$  Hz), 132.19 (d,  $J = 14.1$  Hz), 129.10 (d,  $J = 31.0$  Hz), 116.60 (d,  $J = 81.8$  Hz), 109.97, 45.96, 34.35 (d,  $J =$

18.0 Hz);  $^{19}\text{F}$  NMR (282 MHz,  $\text{CDCl}_3$ )  $\delta$  -75.91— -76.04 (m, 3F), -77.00— -77.14 (m, 3F), -110.47, -185.26— -185.36 (m, 1F); **HRMS (EI)**: $\text{C}_{12}\text{H}_7\text{F}_8\text{NS}+\text{Na}^+$ Calcd: 372.0069, Found: 372.0064.

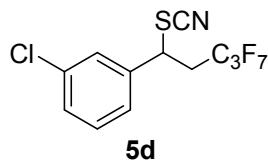

**1-chloro-3-(3,3,4,4,5,5,5-heptafluoro-1-thiocyanatopentyl)benzene**, 62.8 mg, yield:86%, yellow liquid.  $^1\text{H}$  NMR (300 MHz,  $\text{CDCl}_3$ )  $\delta$  7.34–7.39 (m, 3H), 7.25–7.29 (m, 1H), 4.72 (dd,  $J$  = 5.4 Hz, 3.3Hz, 1H), 2.87–3.16 (m, 2H);  $^{13}\text{C}$  NMR (75 MHz,  $\text{CDCl}_3$ )  $\delta$  138.37, 135.34, 130.74, 130.04, 127.36, 125.25, 109.70, 45.87, 34.12 (d,  $J$  = 18.8 Hz);  $^{19}\text{F}$  NMR (282 MHz,  $\text{CDCl}_3$ )  $\delta$  -76.02— -76.12 (m, 3F), -76.93— -77.03 (m, 3F), -185.17— -185.28 (m, 1F); **HRMS (EI)**: $\text{C}_{12}\text{H}_7\text{ClF}_7\text{NS}+\text{Na}^+$ Calcd: 387.9774, Found: 387.9768.

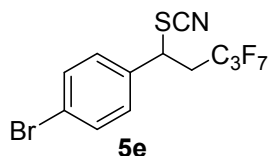

**1-bromo-4-(3,3,4,4,5,5,5-heptafluoro-1-thiocyanatopentyl)benzene**, 70.5 mg, yield:86%, yellow liquid.  $^1\text{H}$  NMR (300 MHz,  $\text{CDCl}_3$ )  $\delta$  7.57 (d,  $J$  = 8.4 Hz 2H), 7.25 (d,  $J$  = 8.4 Hz, 2H), 4.73 (dd,  $J$  = 5.1 Hz, 3.9Hz, 1H), 2.87–3.17 (m, 2H);  $^{13}\text{C}$  NMR (75 MHz,  $\text{CDCl}_3$ )  $\delta$  135.38, 132.69, 128.72, 124.01, 109.79, 45.99, 34.09 (d,  $J$  = 18.0 Hz);  $^{19}\text{F}$  NMR (282 MHz,  $\text{CDCl}_3$ )  $\delta$  -75.90— -76.03 (m, 3F), -76.99— -77.11 (m, 3F), -185.42— -185.52 (m, 1F); **HRMS (EI)**: $\text{C}_{12}\text{H}_7\text{BrF}_7\text{NS}+\text{Na}^+$ Calcd: 431.9268, Found: 431.9263.

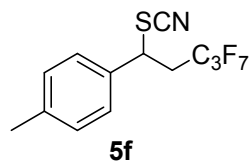

**1-(3,3,4,4,5,5,5-heptafluoro-1-thiocyanatopentyl)-4-methylbenzene**, 59.4 mg, yield:86%, yellow liquid.  $^1\text{H}$  NMR (300 MHz,  $\text{CDCl}_3$ )  $\delta$  7.20–7.27 (m, 4H), 4.78 (dd,  $J$  = 4.8 Hz, 3.9 Hz, 1H), 2.88–3.20 (m, 2H), 2.37 (s, 3H);  $^{13}\text{C}$  NMR (75 MHz,  $\text{CDCl}_3$ )  $\delta$  139.93, 133.24, 130.09, 127.03, 110.42, 46.67, 34.29 (d,  $J$  = 18.0 Hz), 21.22;  $^{19}\text{F}$  NMR (282 MHz,  $\text{CDCl}_3$ )  $\delta$  -75.93— -76.05 (m, 3F), -76.99— -77.12 (m, 3F), -185.42— -185.52 (m, 1F); **HRMS (EI)**: $\text{C}_{13}\text{H}_{10}\text{F}_7\text{NS}+\text{Na}^+$ Calcd: 368.0320, Found: 368.0314



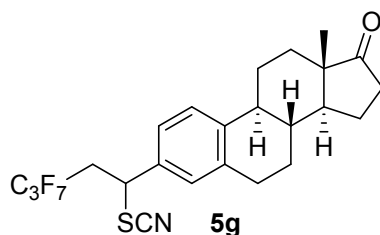

**(8R,9S,13S,14S)-3-(3,3,4,4,5,5,5-heptafluoro-1-thiocyanatopentyl)-13-methyl-6,7,8,9,11,12,13,14,15,16-decahydro-17H-cyclopenta[a]phenanthren-17-one**, 85.3 mg, yield:84%, white liquid.  $^1\text{H NMR}$  (300 MHz,  $\text{CDCl}_3$ )  $\delta$  7.33 (d,  $J = 8.1$  Hz, 1H), 7.08–7.16 (m, 2H), 4.75 (dd,  $J = 5.4$  Hz, 3.0Hz, 1H), 2.91–3.20 (m, 4H), 1.96–2.57 (m, 7H), 1.43–1.69 (m, 6H), 0.92 (s, 3H);  $^{13}\text{C NMR}$  (75 MHz,  $\text{CDCl}_3$ )  $\delta$  141.62, 137.80, 133.77, 127.63 (d,  $J = 5.3$  Hz), 126.42, 124.28 (d,  $J = 5.3$  Hz), 110.49, 50.45, 47.90, 46.53, 44.33, 37.80, 35.81, 34.28, 34.03, 31.52, 29.31, 26.25, 25.52, 21.56, 13.80;  $^{19}\text{F NMR}$  (282 MHz,  $\text{CDCl}_3$ )  $\delta$  -76.02— -76.14 (m, 3F), -76.92— -77.05 (m, 3F), -185.51— -185.57 (m, 1F); **HRMS (EI):** $\text{C}_{24}\text{H}_{24}\text{F}_7\text{NOS}+\text{Na}^+$ Calcd: 530.1365, Found: 530.1359.

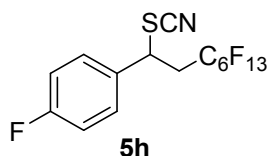

**1-fluoro-4-(3,3,4,4,5,5,6,6,7,7,8,8,8-tridecafluoro-1-thiocyanatooctyl)benzene**, 83.9 mg, yield:84%, white solid, mp 72–75°C.  $^1\text{H NMR}$  (300 MHz,  $\text{CDCl}_3$ )  $\delta$  7.36–7.41 (m, 2H), 7.09–7.16 (m, 2H), 4.80 (dd,  $J = 6.6$  Hz, 7.5Hz, 1H), 2.93–3.09 (m, 2H);  $^{13}\text{C NMR}$  (75 MHz,  $\text{CDCl}_3$ )  $\delta$  163.18 (d,  $J = 249.0$  Hz), 132.36 (d,  $J = 3.8$  Hz), 129.14 (d,  $J = 8.3$  Hz), 116.61 (d,  $J = 21.8$  Hz), 109.99, 44.63, 36.70 (t,  $J = 21.0$  Hz);  $^{19}\text{F NMR}$  (282 MHz,  $\text{CDCl}_3$ )  $\delta$  -80.82— -80.90 (m, 3F), -110.57 (s, 1F), -111.58— -113.97 (m, 2F), -121.80— -121.98 (m, 2F), -122.90— -123.29 (m, 2F), -123.30— -123.37 (m, 2F), -126.18— -126.31 (m, 2F); **HRMS (EI):** $\text{C}_{15}\text{H}_7\text{F}_{14}\text{NS}+\text{Na}^+$ Calcd: 521.9973, Found: 521.9968.

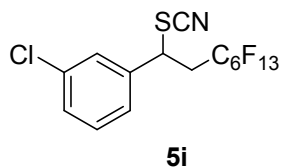

**1-chloro-3-(3,3,4,4,5,5,6,6,7,7,8,8-dodecafluoro-1-thiocyanatononyl)benzene**, 91.8 mg, yield:89%, white solid, mp 67–69°C.  $^1\text{H NMR}$  (300 MHz,  $\text{CDCl}_3$ )  $\delta$  7.34–7.39 (m, 3H), 7.27–7.31 (m, 2H), 4.72 (t,  $J = 7.2$  Hz, 1H), 2.93–3.08 (m, 2H);  $^{13}\text{C NMR}$  (75 MHz,  $\text{CDCl}_3$ )  $\delta$  138.56, 135.53, 130.74, 129.99, 127.39, 125.33, 109.76, 44.52, 36.45 (t,  $J = 21.0$  Hz);  $^{19}\text{F NMR}$  (282

MHz, CDCl<sub>3</sub>) δ -80.97— -81.05 (m, 3F), -111.62— -112.67 (m, 1F), -112.84— -113.87 (m, 1F), -121.86— -121.95 (m, 2F), -123.00— -123.04 (m, 2F), -123.29— -123.41 (m, 2F), -126.28— -126.42 (m, 2F); **HRMS (EI)**:C<sub>15</sub>H<sub>7</sub>ClF<sub>13</sub>NS+Na<sup>+</sup>Calcd: 537.9678, Found: 537.9672.

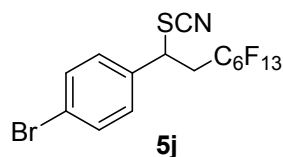

**1-bromo-4-(3,3,4,4,5,5,6,6,7,7,8,8,8-tridecafluoro-1-thiocyanatoethyl)benzene**, 94.1 mg, yield:84%, yellow solid, mp 57—59°C. **<sup>1</sup>H NMR** (300 MHz, CDCl<sub>3</sub>) δ 7.57 (d, *J* = 8.7 Hz, 2H), 7.27 (d, *J* = 8.4 Hz, 2H), 4.75 (dd, *J* = 6.6 Hz, 1.2Hz, 1H), 2.93–3.08 (m, 2H); **<sup>13</sup>C NMR** (75 MHz, CDCl<sub>3</sub>) δ 135.54, 132.72, 128.77, 123.99, 109.81, 44.67, 36.34 (d, *J* = 21.0 Hz); **<sup>19</sup>F NMR** (282 MHz, CDCl<sub>3</sub>) δ -80.81 (t, *J* = 9.9 Hz, 3F), -111.39— -112.44 (m, 1F), -112.78— -113.83 (m, 1F), -121.77— -121.85 (m, 2F), -122.87— -122.93 (m, 2F), -123.21— -123.33 (m, 2F), -126.14— -126.27 (m, 2F); **HRMS (EI)**:C<sub>15</sub>H<sub>7</sub>BrF<sub>13</sub>NS+Na<sup>+</sup>Calcd: 581.9173, Found: 581.9167.

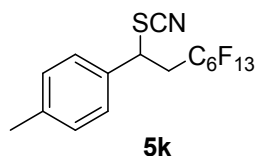

**1-methyl-4-(3,3,4,4,5,5,6,6,7,7,8,8,8-tridecafluoro-1-thiocyanatoethyl)benzene**, 86.2 mg, yield:87%, white solid, mp 66—69°C. **<sup>1</sup>H NMR** (300 MHz, CDCl<sub>3</sub>) δ 7.25 (q, *J* = 8.4 Hz 4H), 4.77 (dd, *J* = 6.3 Hz, 1.5 Hz, 1H), 2.93–3.08 (m, 2H), 2.37 (s, 3H); **<sup>13</sup>C NMR** (75 MHz, CDCl<sub>3</sub>) δ 139.91, 133.38, 130.11, 127.05, 110.44, 45.31, 36.78 (d, *J* = 21.0 Hz), 21.22; **<sup>19</sup>F NMR** (282 MHz, CDCl<sub>3</sub>) δ -81.83 (t, *J* = 10.2 Hz, 3F), -111.61— -112.71 (m, 1F), -112.96— -114.04 (m, 1F), -121.79— -121.88 (m, 2F), -122.94 (d, *J* = 3.7 Hz 2F), -123.27— -123.38 (m, 2F), -126.17— -126.28 (m, 2F); **HRMS (EI)**:C<sub>16</sub>H<sub>10</sub>F<sub>13</sub>NS+Na<sup>+</sup>Calcd: 518.0224, Found: 518.0219.

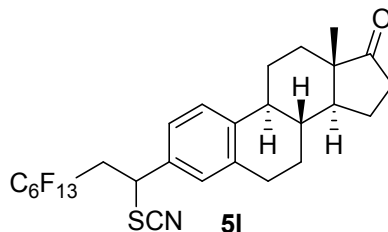

**(8R,9S,13S,14S)-13-methyl-3-(3,3,4,4,5,5,6,6,7,7,8,8,8-tridecafluoro-1-thiocyanatoethyl)-6,7,8,9,11,12,13,14,15,16-decahydro-17H-cyclopenta[a]phenanthren-17-one**, 113.1 mg, yield:86%, white solid, mp 137—140°C. **<sup>1</sup>H NMR** (300 MHz, CDCl<sub>3</sub>) δ 7.34 (d, *J* = 8.1 Hz, 1H), 7.09–7.17 (m, 2H), 4.74 (t, *J* = 6.6 Hz, 1H), 2.93–3.11 (m, 4H), 1.96–2.57 (m, 7H), 1.43–1.72 (m,

6H), 0.92 (s, 3H);  $^{13}\text{C}$  NMR (75 MHz,  $\text{CDCl}_3$ )  $\delta$  141.62, 137.85, 133.90, 127.67 (d,  $J = 5.3$  Hz), 126.46, 124.33 (d,  $J = 4.5$  Hz), 110.49, 50.46, 47.91, 45.21, 44.35, 37.82, 36.59, 35.80, 31.52, 29.31, 26.24, 25.53, 21.56, 13.79;  $^{19}\text{F}$  NMR (282 MHz,  $\text{CDCl}_3$ )  $\delta$  -80.83 (t,  $J = 9.9$  Hz, 3F), -111.74—112.77 (m, 1F), -112.93—114.01 (m, 1F), -121.80 (t,  $J = 10.7$  Hz, 2F), -122.92 (d,  $J = 3.7$  Hz, 2F), -123.25—123.31 (m, 2F), -126.15—126.28 (m, 2F); **HRMS (EI)**:  $\text{C}_{27}\text{H}_{24}\text{F}_{13}\text{NOS} + \text{Na}^+$  Calcd: 680.1269, Found: 680.1263.

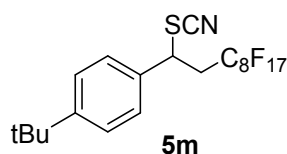

**1-(tert-butyl)-4-(3,3,4,4,5,5,6,6,7,7,8,8,9,9,10,10,10-heptafluoro-1-thiocyanatodecyl)benzene**, 112.2 mg, yield:88%, white solid, mp 87—89°C.  $^1\text{H}$  NMR (300 MHz,  $\text{CDCl}_3$ )  $\delta$  7.42–7.45 (m, 2H), 7.29–7.32 (m, 2H), 4.77 (t,  $J = 6.6$  Hz, 1H), 2.90–3.12 (m, 2H), 1.32 (s, 9H);  $^{13}\text{C}$  NMR (75 MHz,  $\text{CDCl}_3$ )  $\delta$  152.95, 133.39, 126.81, 126.38, 110.50, 45.14, 36.50 (d,  $J = 21.8$  Hz), 34.74, 31.13;  $^{19}\text{F}$  NMR (282 MHz,  $\text{CDCl}_3$ )  $\delta$  -80.82 (t,  $J = 9.6$  Hz, 3F), -112.73—112.85 (m, 1F), -112.97—113.18 (m, 1F), -121.61 (d,  $J = 7.9$  Hz, 2F), -121.97 (t,  $J = 7.3$  Hz, 4F), -122.79 (d,  $J = 3.1$  Hz, 2F), -123.27 (d,  $J = 13.5$  Hz, 2F), -126.14—126.26 (m, 2F); **HRMS (EI)**:  $\text{C}_{21}\text{H}_{16}\text{F}_{17}\text{NS} + \text{Na}^+$  Calcd: 660.0630, Found: 660.0650.

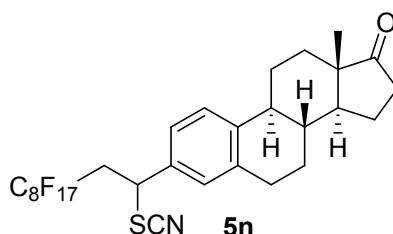

**(8R,9S,13S,14S)-3-(3,3,4,4,5,5,6,6,7,7,8,8,9,9,10,10,10-heptafluoro-1-thiocyanatodecyl)-13-methyl-6,7,8,9,11,12,13,14,15,16-decahydro-17H-cyclopenta[a]phenanthren-17-one**, 124.2 mg, yield:82%, yellow liquid.  $^1\text{H}$  NMR (300 MHz,  $\text{CDCl}_3$ )  $\delta$  7.34 (d,  $J = 8.1$  Hz, 1H), 7.10–7.17 (m, 2H), 4.74 (t,  $J = 6.9$  Hz, 1H), 2.56–3.08 (m, 4H), 1.97–2.54 (m, 7H), 1.43–1.97 (m, 6H), 0.93 (s, 3H);  $^{13}\text{C}$  NMR (75 MHz,  $\text{CDCl}_3$ )  $\delta$  141.61, 137.84, 133.91, 127.67 (d,  $J = 5.3$  Hz), 126.46, 124.33 (d,  $J = 5.3$  Hz), 110.48, 50.46, 47.90, 45.18, 44.34, 37.82, 36.61, 35.80, 31.52, 29.30, 26.24, 25.53, 21.55, 13.78;  $^{19}\text{F}$  NMR (282 MHz,  $\text{CDCl}_3$ )  $\delta$  -80.83—80.91 (m, 3F), -112.67—112.78 (m, 1F), -112.94—113.05 (m, 1F), -121.63 (d,  $J = 7.9$  Hz, 2F), -121.98 (d,  $J = 7.6$  Hz, 4F), -122.82 (s, 2F), -123.82 (s, 2F), -126.17—126.28 (m, 2F); **HRMS (EI)**:  $\text{C}_{29}\text{H}_{24}\text{F}_{17}\text{NOS} + \text{Na}^+$  Calcd: 780.1250, Found: 780.1199

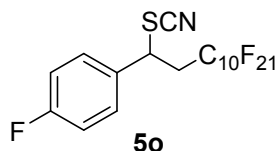

**1-fluoro-4-(3,3,4,4,5,5,6,6,7,7,8,8,9,9,10,10,11,11,12,12,12-henicosafluoro-1-thiocyanatododecyl)benzene**, 100.7 mg, yield:72%, white solid, mp 61–63°C. <sup>1</sup>H NMR (300 MHz, CDCl<sub>3</sub>) δ 7.36–7.41 (m, 2H), 7.12 (t, *J* = 8.4 Hz, 2H), 4.78(t, *J* = 7.2 Hz, 1H), 2.93–3.07 (m, 2H); <sup>13</sup>C NMR (75 MHz, CDCl<sub>3</sub>) δ 163.18 (d, *J* = 249.0 Hz), 132.36 (d, *J* = 3.0 Hz), 129.13 (d, *J* = 8.3Hz), 116.60 (d, *J* = 21.8 Hz), 109.97, 44.64, 36.71 (t, *J* = 21.0 Hz); <sup>19</sup>F NMR (282 MHz, CDCl<sub>3</sub>) δ -80.80— -80.96 (m, 3F), -110.59 (d, *J* = 14.1 Hz, 1F), -111.52— -112.58 (m, 1F), -112.88— -113.98 (m, 1F), -121.79 (d, *J* = 62.0 Hz 10F), -122.84 (s, 2F), -123.27 (s, 2F), -126.27 (d, *J* = 8.5 Hz 2F); **HRMS (EI):**C<sub>19</sub>H<sub>7</sub>F<sub>22</sub>NS+Na<sup>+</sup>Calcd: 721.9846, Found: 721.9840.

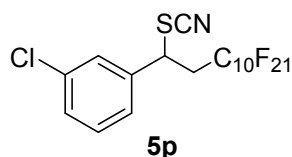

**1-chloro-3-(3,3,4,4,5,5,6,6,7,7,8,8,9,9,10,10,11,11,12,12,12-henicosafluoro-1-thiocyanatododecyl)benzene**, 111.65 mg, yield:78%, white solid, mp 69–73°C. <sup>1</sup>H NMR (300 MHz, CDCl<sub>3</sub>) δ 7.35–7.40 (m, 3H), 7.26–7.31 (m, 1H), 4.72(t, *J* = 6.9 Hz, 1H), 2.93–3.08 (m, 2H); <sup>13</sup>C NMR (75 MHz, CDCl<sub>3</sub>) δ 138.50, 135.38, 130.77, 130.04, 127.39, 125.32, 109.70, 44.57, 36.40 (d, *J* = 21.0 Hz); <sup>19</sup>F NMR (282 MHz, CDCl<sub>3</sub>) δ -80.77— -80.84 (m, 3F), -111.47— -112.53 (m, 1F), -112.75— -113.81 (m, 1F), -121.72 (d, *J* = 70.5 Hz 10F), -122.78 (s, 2F), -123.18 (s, 2F), -126.19 (s, 2F); **HRMS (EI):**C<sub>19</sub>H<sub>7</sub>ClF<sub>21</sub>NS+Na<sup>+</sup>Calcd: 737.9550, Found: 737.9545.

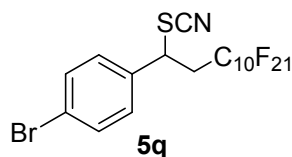

**1-bromo-4-(3,3,4,4,5,5,6,6,7,7,8,8,9,9,10,10,11,11,12,12,12-henicosafluoro-1-thiocyanatododecyl)benzene**, 117.1 mg, yield:77%, yellow solid, mp 98-100°C. <sup>1</sup>H NMR (300 MHz, CDCl<sub>3</sub>) δ 7.58 (d, *J* = 8.4 Hz, 2H), 7.28 (d, *J* = 7.2 Hz, 2H), 4.73 (t, *J* = 6.9 Hz, 1H), 2.93–3.08 (m, 2H); <sup>13</sup>C NMR (75 MHz, CDCl<sub>3</sub>) δ 135.54, 132.74, 128.78, 124.01, 109.81, 44.70, 36.53 (t, *J* = 21.0 Hz); <sup>19</sup>F NMR (282 MHz, CDCl<sub>3</sub>) δ -80.70— -80.77 (m, 3F), -111.32— -112.37 (m, 1F), -112.75— -113.81 (m, 1F), -121.80 (s, 10F), -122.73 (s, 2F), -123.18 (s, 2F), -126.14 (s,2F); **HRMS (EI):**C<sub>19</sub>H<sub>7</sub>BrF<sub>21</sub>NS+Na<sup>+</sup>Calcd: 781.9045, Found: 781.9039.

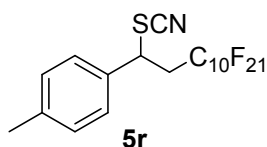

**1-(3,3,4,4,5,5,6,6,7,7,8,8,9,9,10,10,11,11,12,12,12-henicosafuoro-1-thiocyanatododecyl)-4-methylbenzene**, 104.3 mg, yield:75%, white solid, mp 97-102°C.  $^1\text{H NMR}$  (300 MHz,  $\text{CDCl}_3$ )  $\delta$  7.27 (d,  $J = 8.4$  Hz 2H), 7.22 (d,  $J = 8.1$  Hz, 2H), 4.77 (t,  $J = 6.3$  Hz, 1H), 2.93–3.11 (m, 2H), 2.37 (s, 3H);  $^{13}\text{C NMR}$  (75 MHz,  $\text{CDCl}_3$ )  $\delta$  139.90, 133.43, 130.10, 127.05, 110.41, 45.32, 36.66 (d,  $J = 20.3$  Hz), 21.17;  $^{19}\text{F NMR}$  (282 MHz,  $\text{CDCl}_3$ )  $\delta$  -80.92 (t,  $J = 9.9$ Hz, 3F), -111.67— -112.74 (m, 1F), -113.00— -114.07 (m, 1F), -121.81 (d,  $J = 68.2$  Hz 10F), -122.86 (s, 2F), -123.32 (s, 2F), -126.29 (s,2F); **HRMS (EI)**: $\text{C}_{20}\text{H}_{10}\text{F}_{21}\text{NS}+\text{Na}^+$ Calcd: 718.0096, Found: 718.0091.

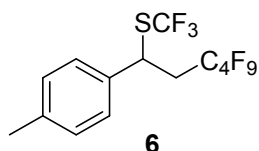

**(3,3,4,4,5,5,6,6-nonafluoro-1-(p-tolyl)hexyl)(trifluoromethyl)sulfane**, 53.4 mg, yield:61%, yellow liquid.  $^1\text{H NMR}$  (300 MHz,  $\text{CDCl}_3$ )  $\delta$  7.24 (dd,  $J = 8.4$  Hz, 5.4 Hz, 4H), 4.75 (dd,  $J = 5.4$  Hz, 3.3 Hz, 1H), 2.80–2.97 (m, 2H), 2.35 (s, 3H);  $^{13}\text{C NMR}$  (75 MHz,  $\text{CDCl}_3$ )  $\delta$  138.75, 135.03, 131.84, 129.86, 127.76, 127.02, 41.74, 37.68 (t,  $J = 20.3$  Hz), 21.10;  $^{19}\text{F NMR}$  (282 MHz,  $\text{CDCl}_3$ )  $\delta$  -40.65 (s, 3F), -81.12— -81.20 (m, 3F), -111.75— -112.77 (m, 1F), -113.74— -114.80 (m, 1F), -124.51— -124.56 (m, 2F), -126.02— -126.12 (m, 2F).

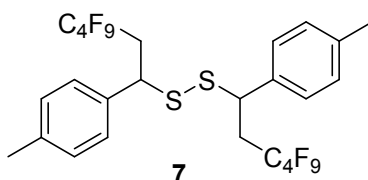

**1,2-bis(3,3,4,4,5,5,6,6-nonafluoro-1-(p-tolyl)hexyl)disulfane**, 125.4 mg, yield:85%, yellow solid, mp 79–81°C.  $^1\text{H NMR}$  (300 MHz,  $\text{CDCl}_3$ )  $\delta$  7.08–7.17 (m, 4H), 6.98–7.06 (m, 4H), 3.64–3.74 (m, 2H), 2.54–2.80 (m, 4H), 2.28 (s, 6H);  $^{13}\text{C NMR}$  (75 MHz,  $\text{CDCl}_3$ )  $\delta$  137.49, 137.43, 134.33, 128.58, 128.53, 126.77, 126.64, 45.38, 45.06, 34.53, 34.25, 34.18, 33.97, 20.11, 20.09;  $^{19}\text{F NMR}$  (282 MHz,  $\text{CDCl}_3$ )  $\delta$  -80.06— -81.13 (m, 3F), -111.01— -112.08 (m, 2F), -113.17— -114.33 (m, 2F), -124.34— -124.43 (m, 4F), -124.44— -126.07 (m, 4F); **HRMS (EI)**: $\text{C}_{26}\text{H}_{20}\text{F}_{18}\text{S}_2+\text{Na}^+$ Calcd: 761.0617, Found: 761.0611.

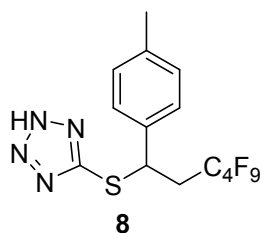

**5-((3,3,4,4,5,5,6,6,6-nonafluoro-1-(p-tolyl)hexyl)thio)-2H-tetrazole**, 60.5 mg, yield:69%, white solid, mp 82–85°C. **<sup>1</sup>H NMR** (300 MHz, CDCl<sub>3</sub>) δ 7.25 (d, *J* = 7.8 Hz 3H), 7.13 (d, *J* = 7.8 Hz, 2H), 5.18 (dd, *J* = 5.1 Hz, 4.2 Hz, 1H), 2.84–3.19 (m, 2H), 2.32 (s, 3H); **<sup>13</sup>C NMR** (75 MHz, CDCl<sub>3</sub>) δ 153.96, 138.92, 134.95, 129.83, 127.21, 44.78, 36.73 (t, *J* = 20.3 Hz), 21.15; **<sup>19</sup>F NMR** (282 MHz, CDCl<sub>3</sub>) δ -81.03— -81.09 (m, 3F), -111.35— -112.40 (m, 1F), -113.40— -114.45 (m, 1F), -124.34— -124.41 (m, 2F), -125.90— -126.03 (m, 2F); **HRMS (EI)**:C<sub>14</sub>H<sub>11</sub>F<sub>9</sub>N<sub>4</sub>S+H<sup>+</sup>Calcd: 439.0633, Found: 439.0639.

## 8. NMR spectra of the products

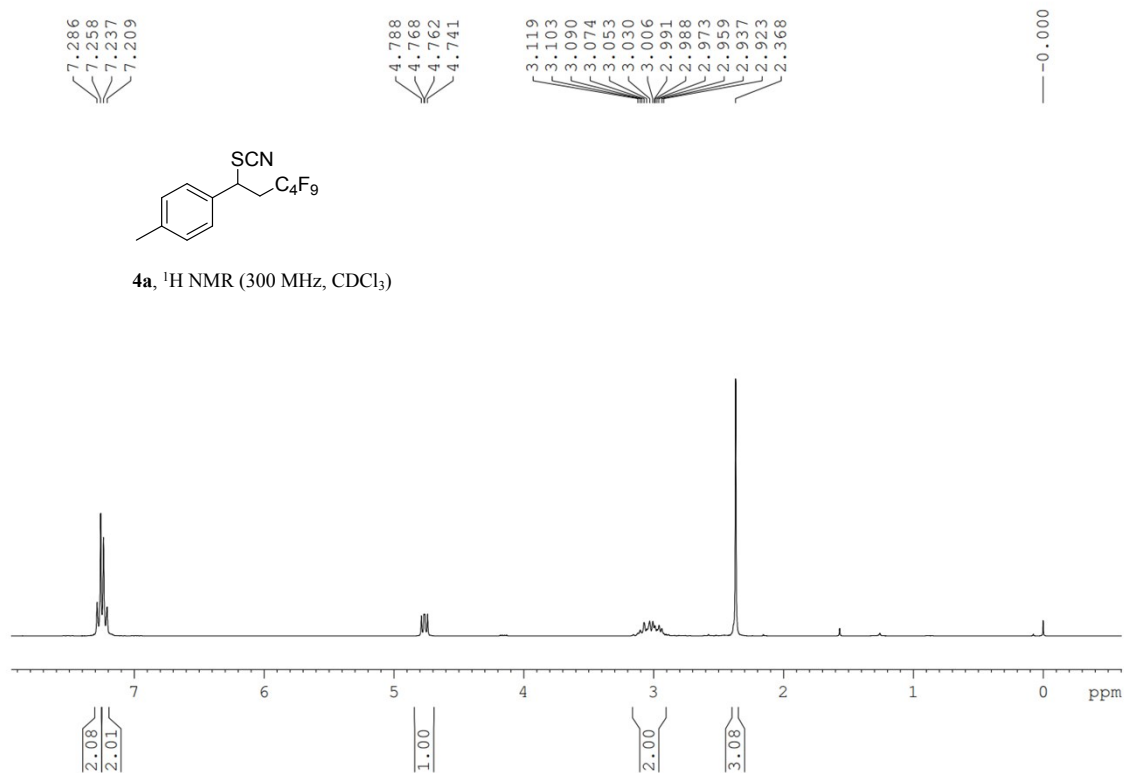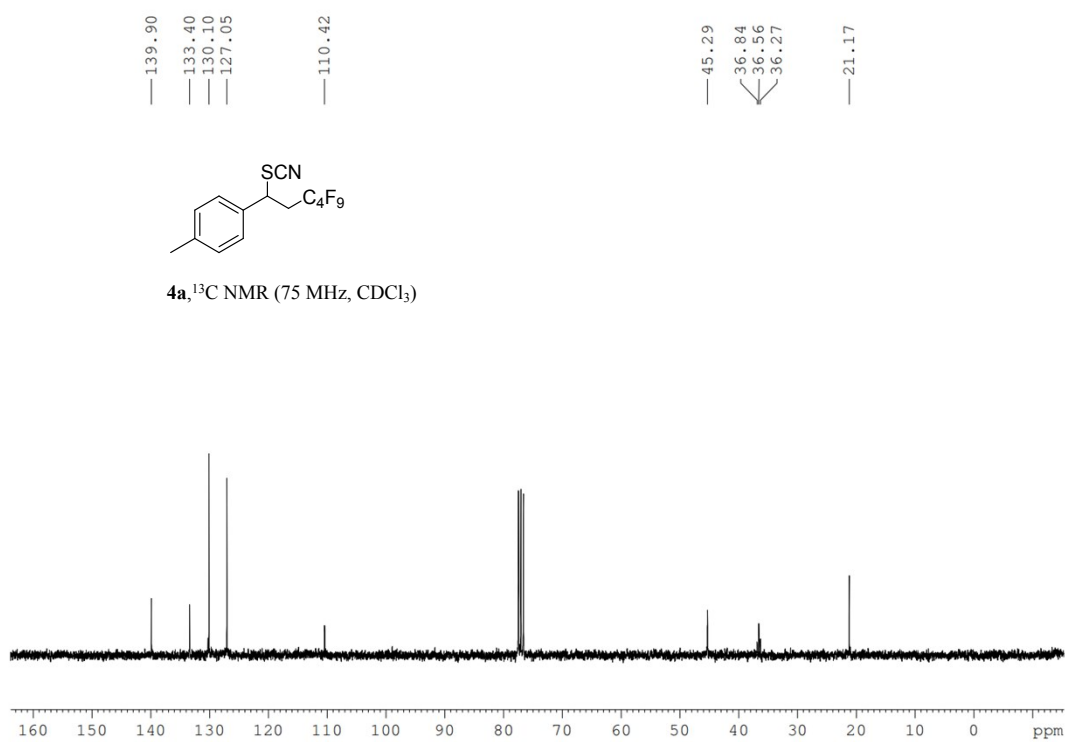

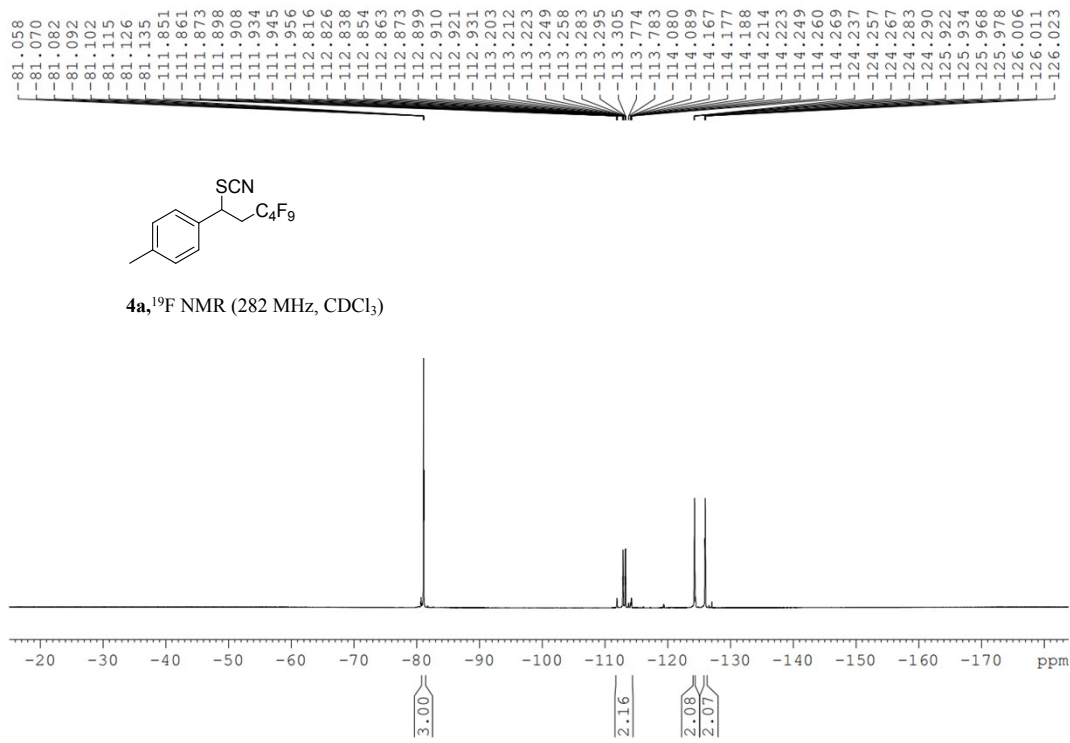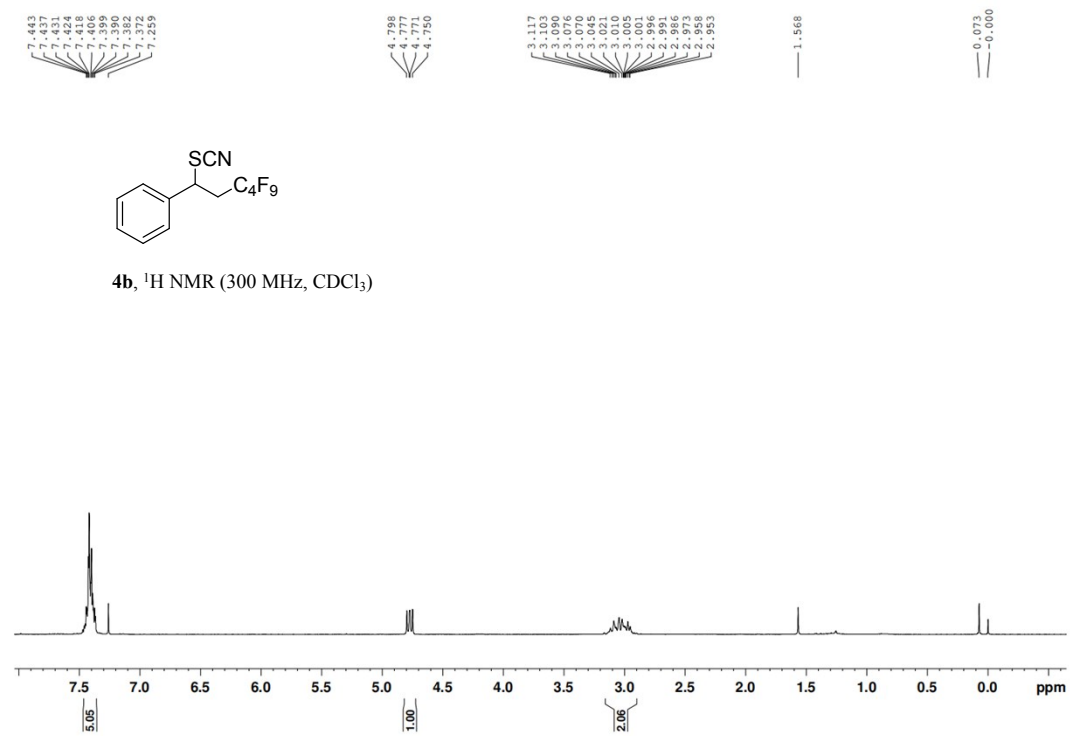





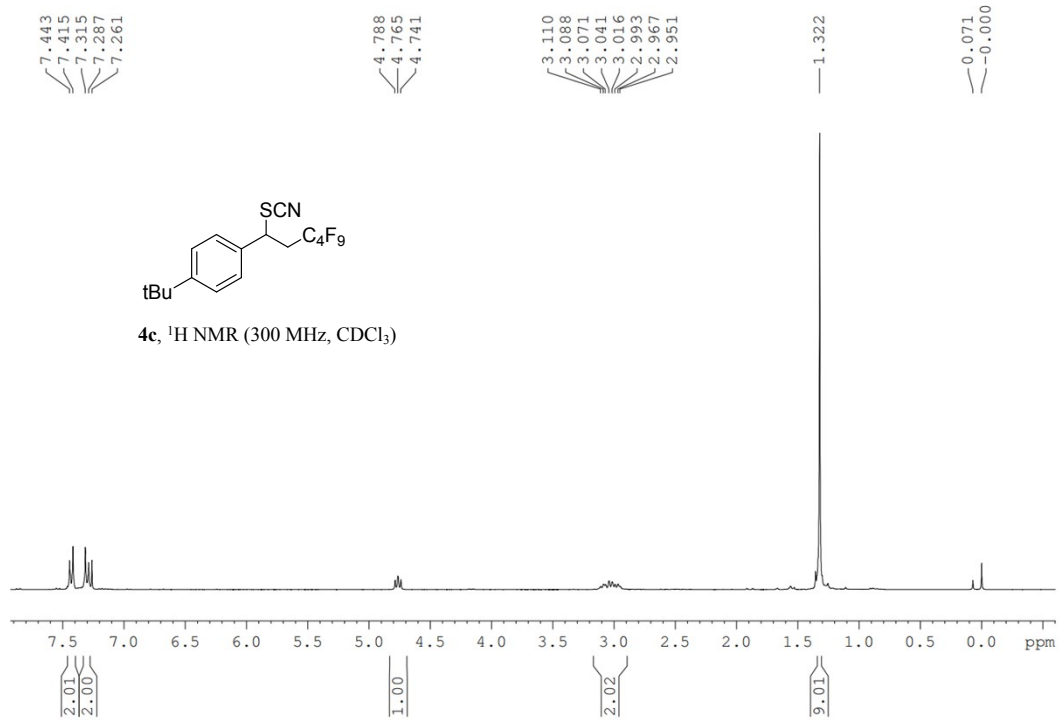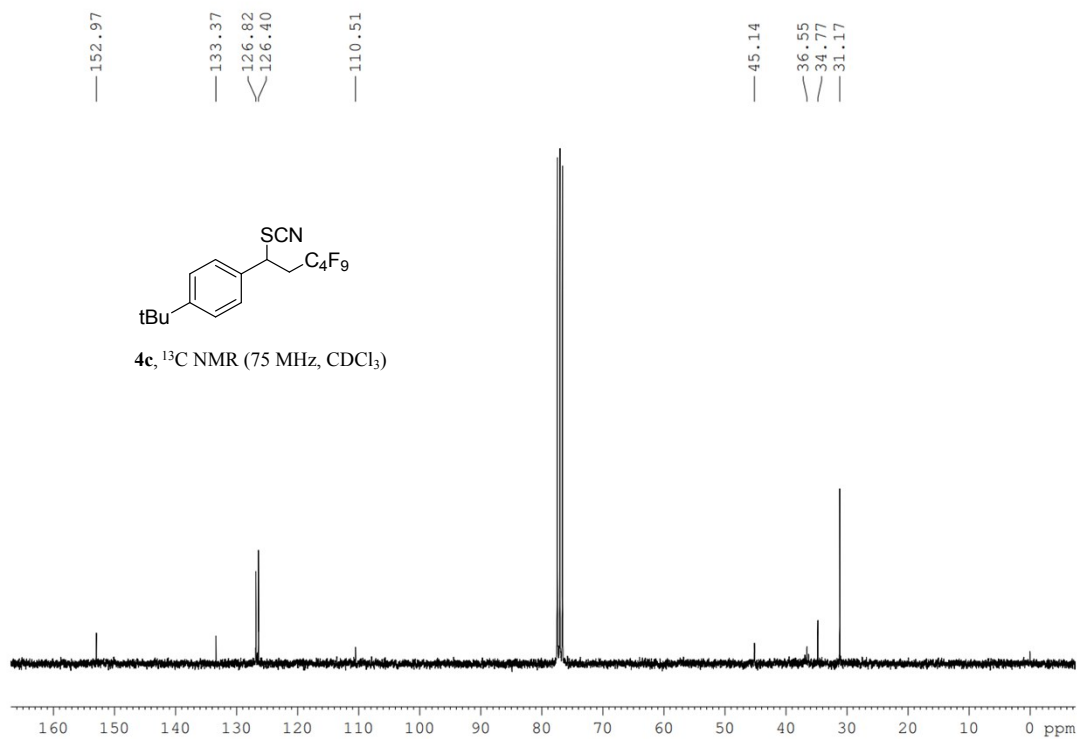

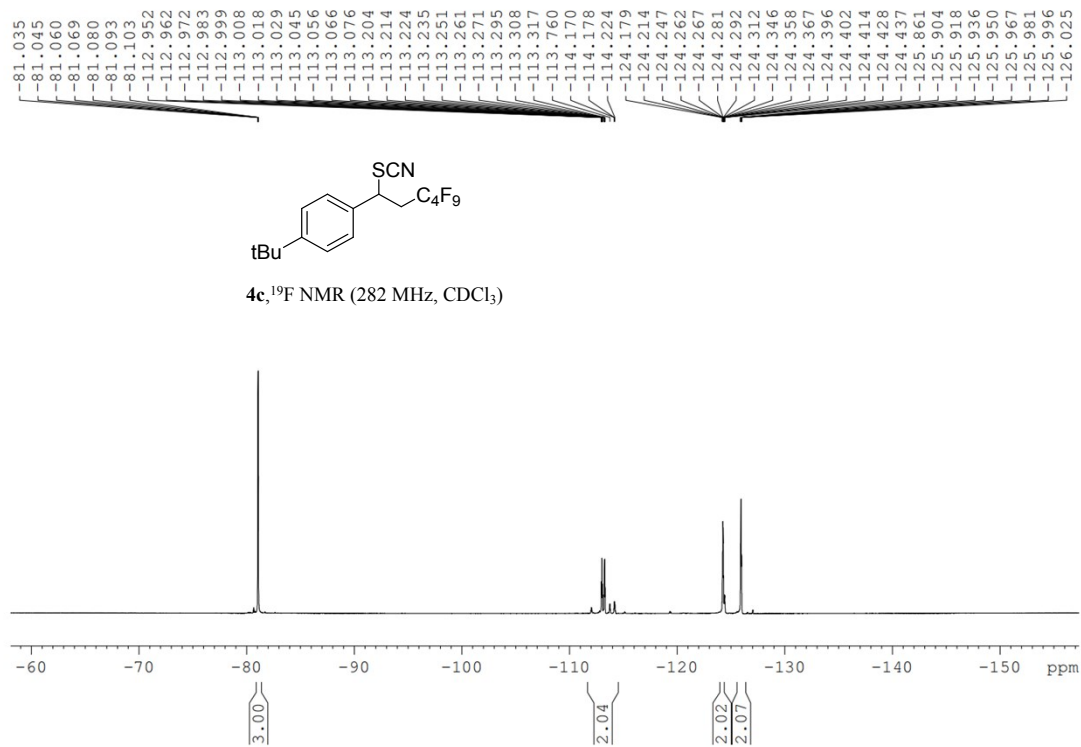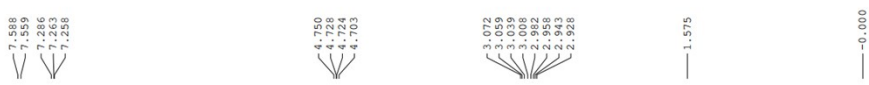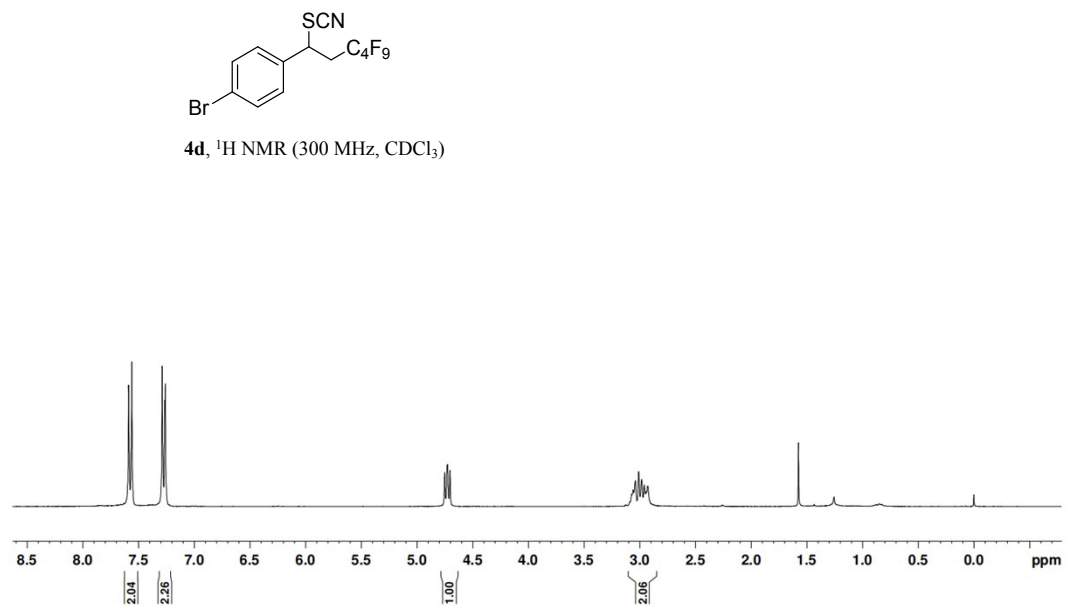

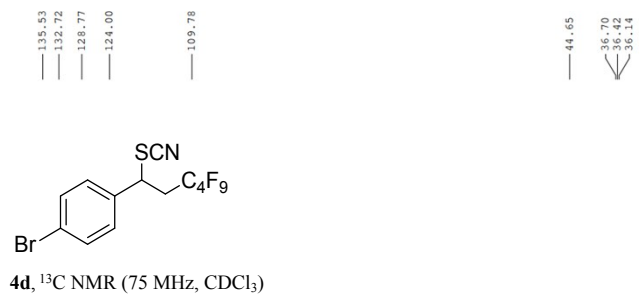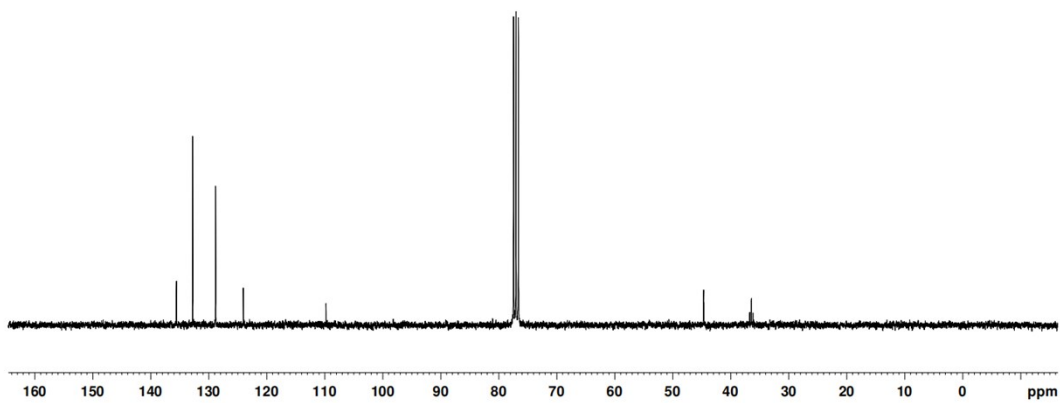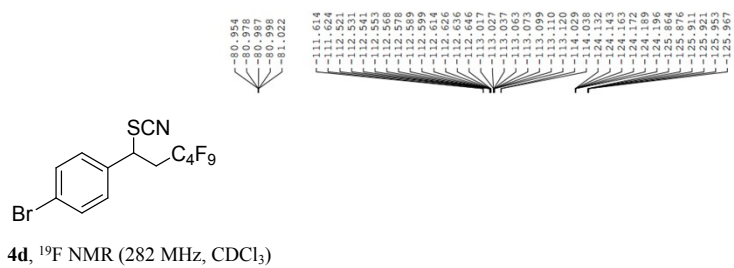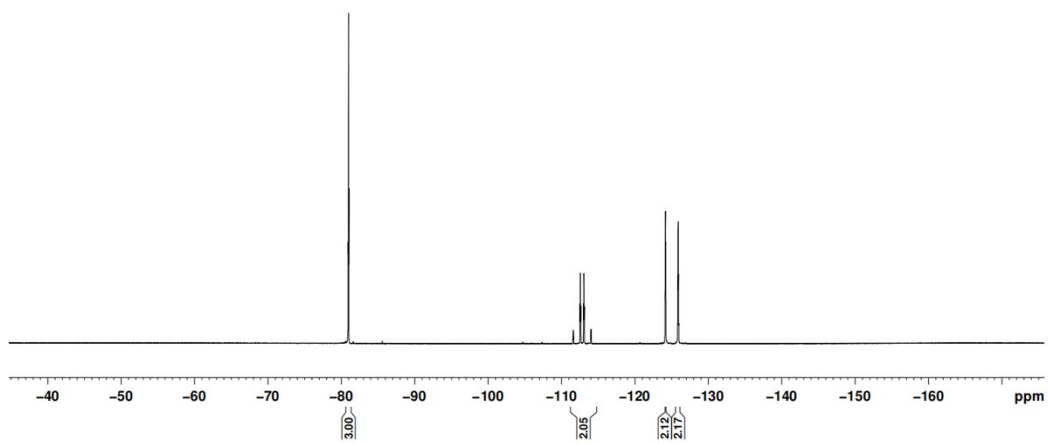

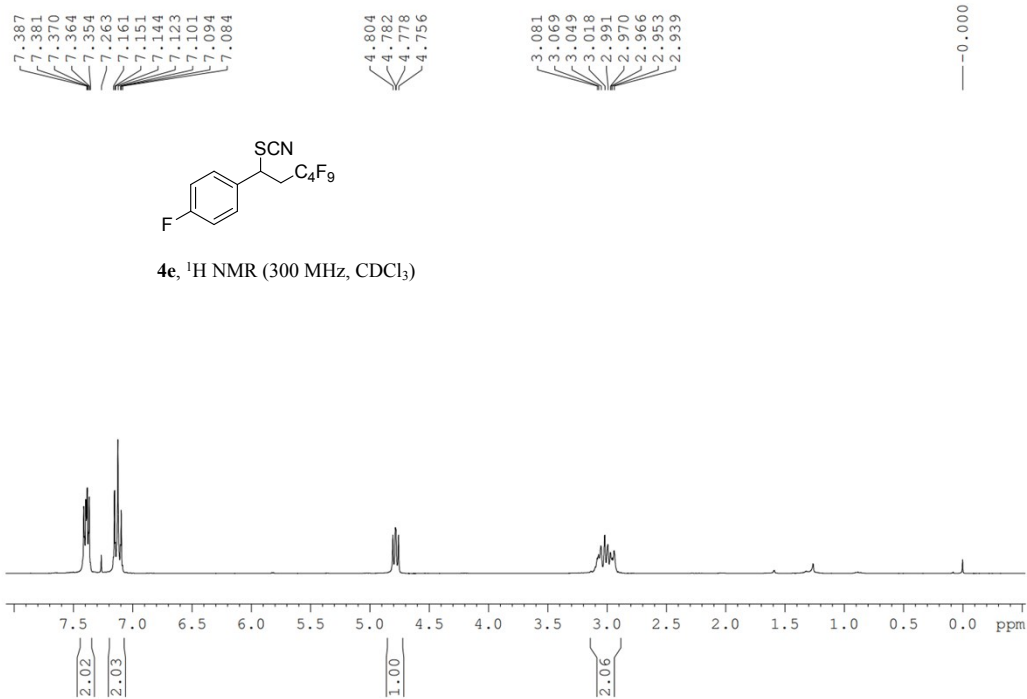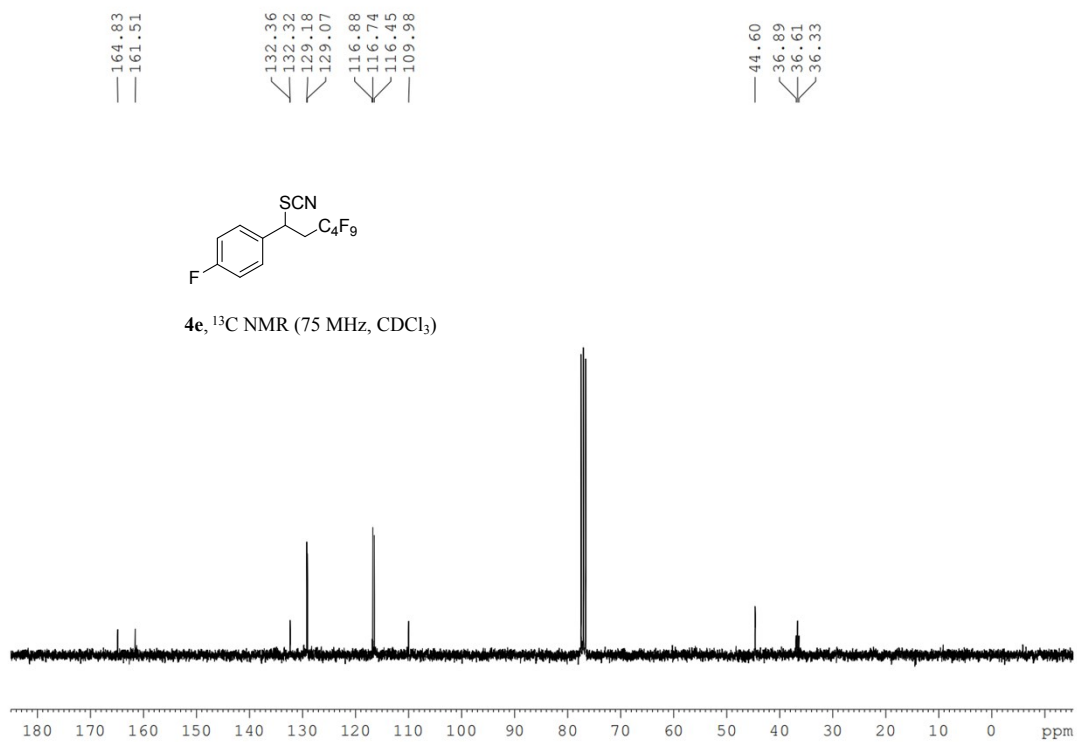

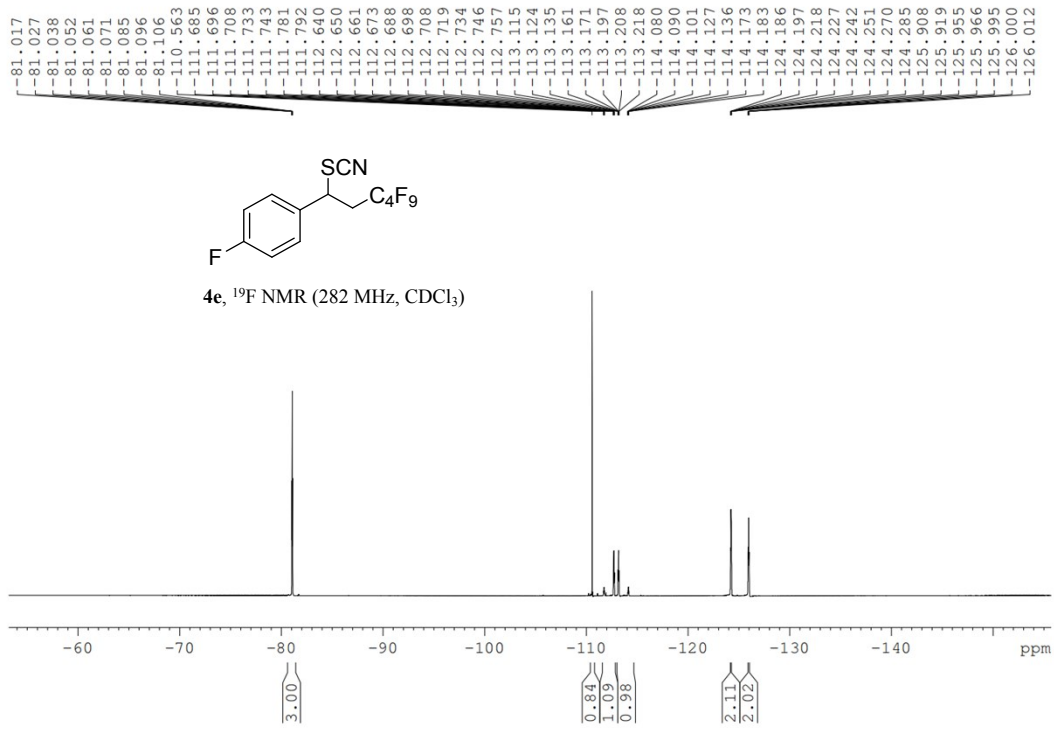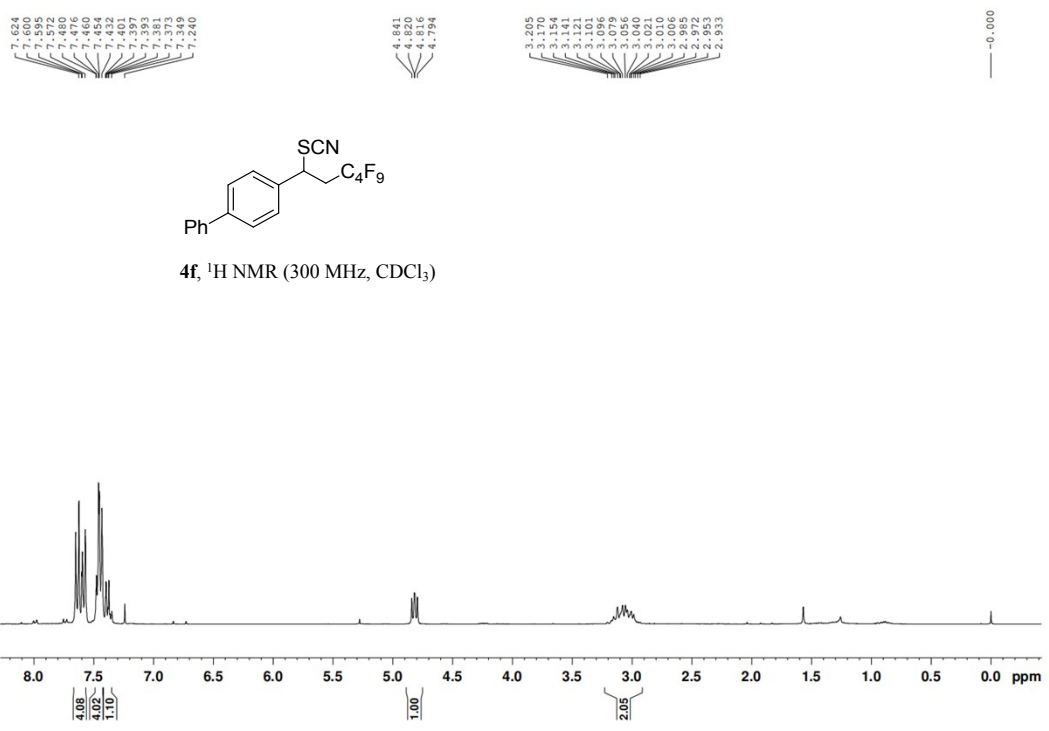

142.68  
139.82  
135.31  
128.93  
128.10  
127.94  
127.12  
127.13  
110.30

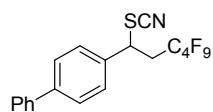

4f, <sup>13</sup>C NMR (75 MHz, CDCl<sub>3</sub>)

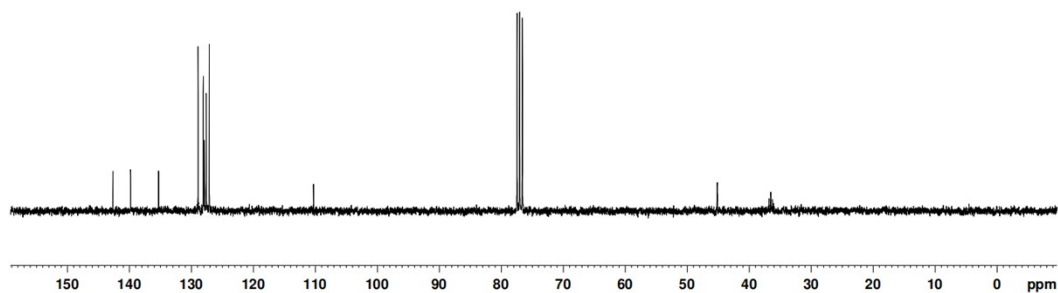

81.007

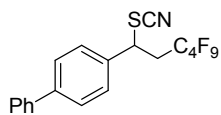

4f, <sup>19</sup>F NMR (282 MHz, CDCl<sub>3</sub>)

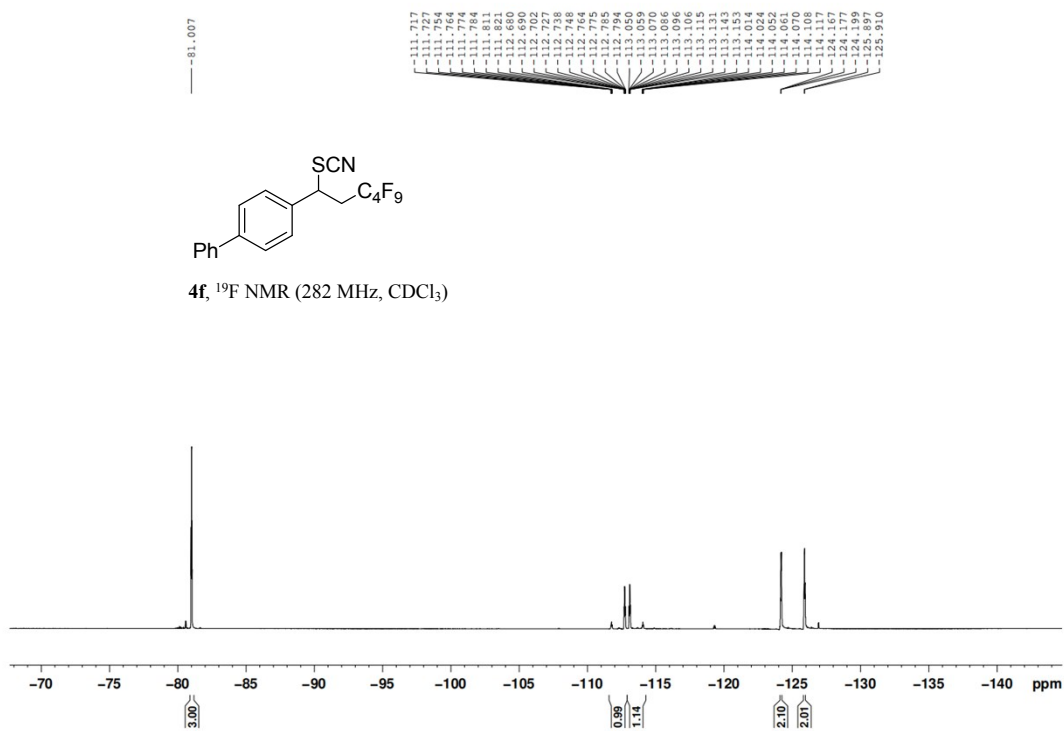

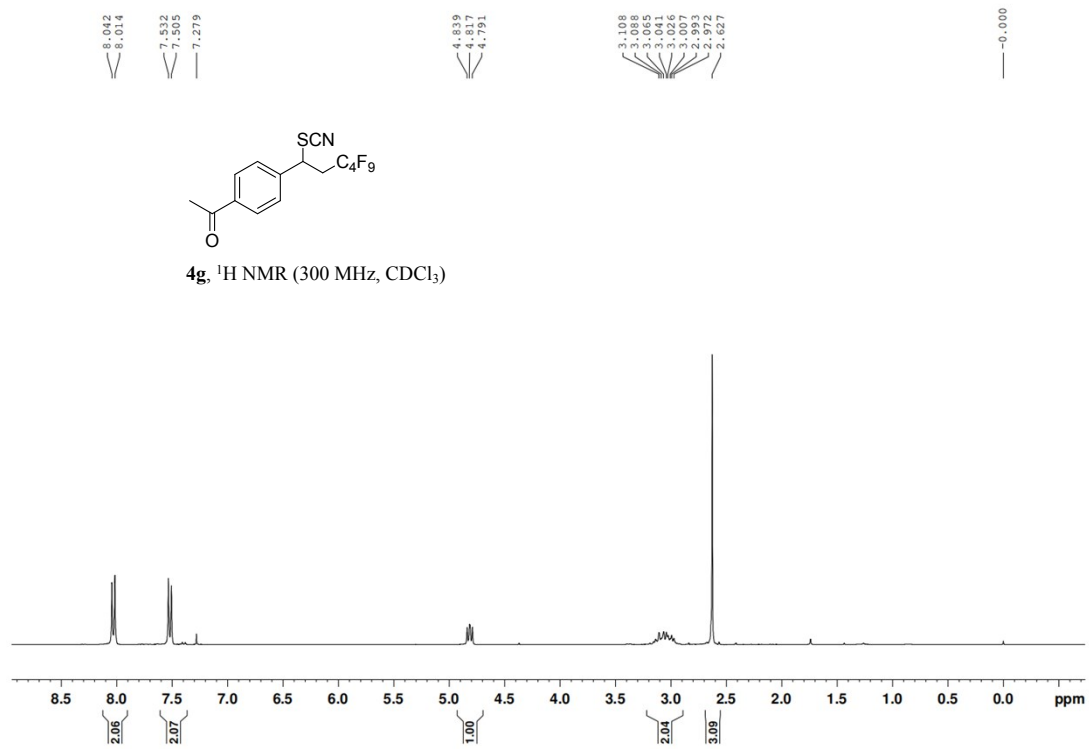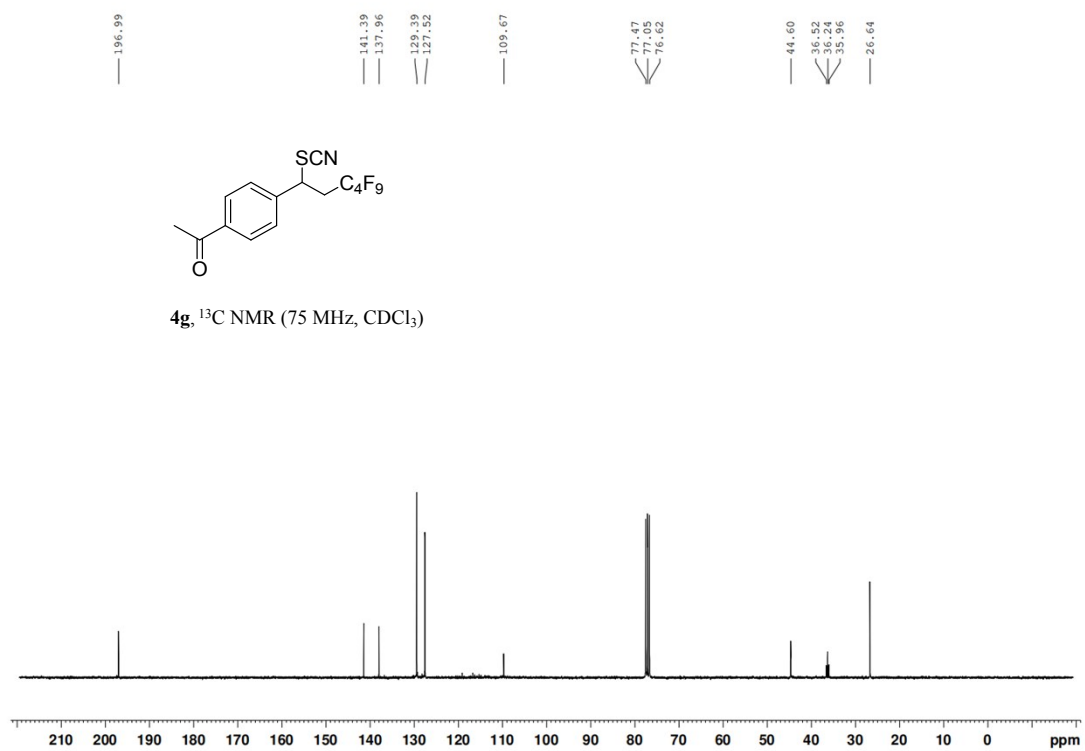



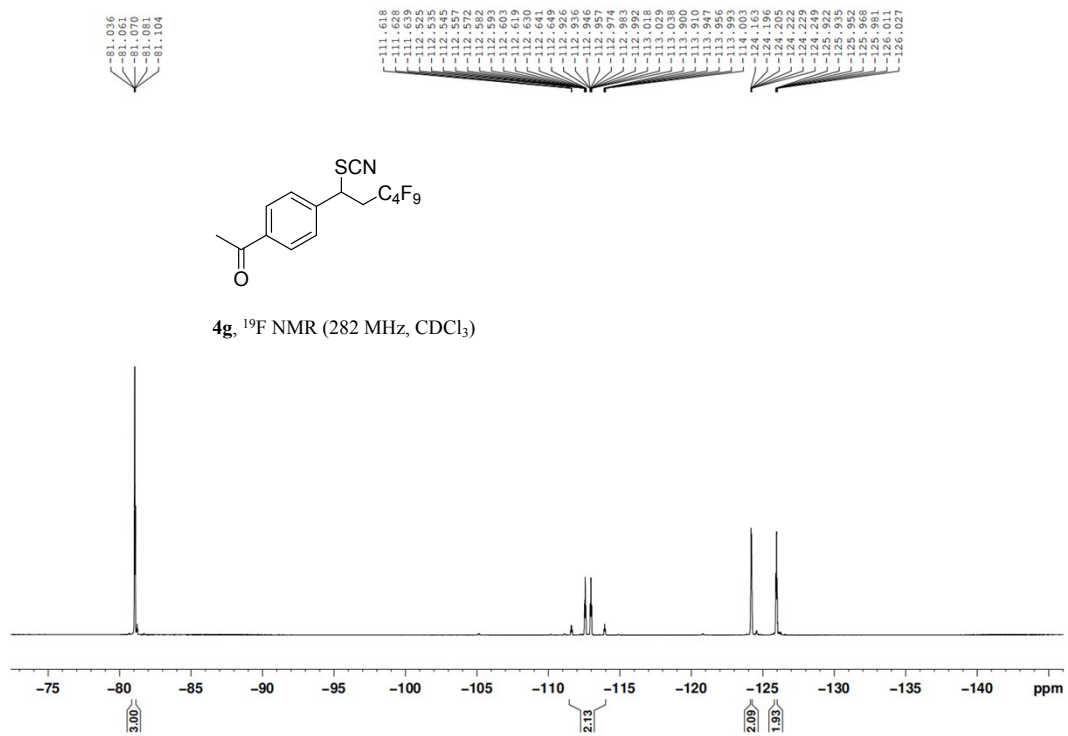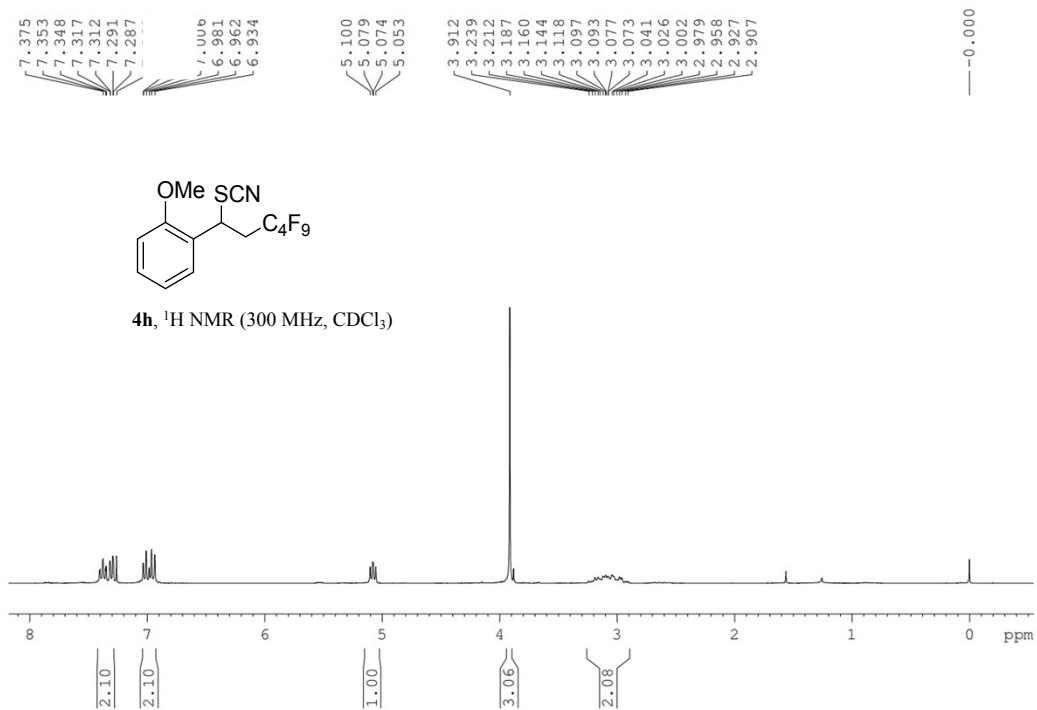

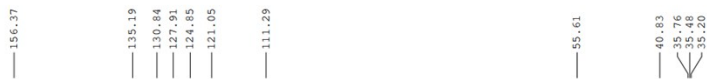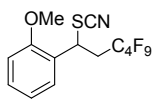

4h, <sup>13</sup>C NMR (75 MHz, CDCl<sub>3</sub>)

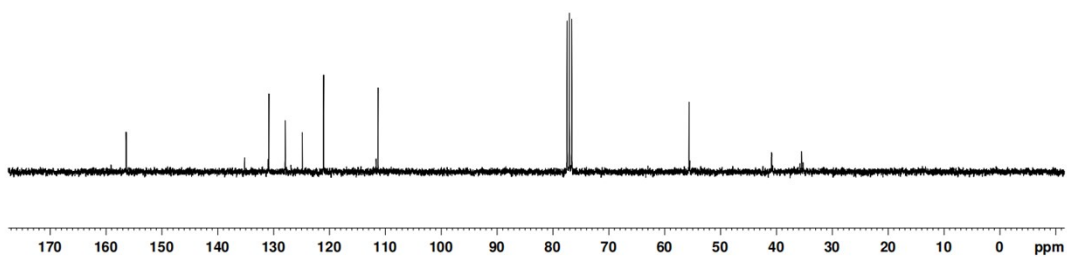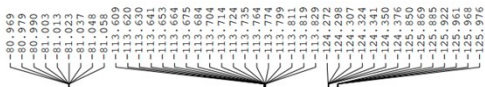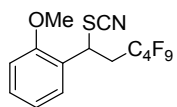

4h, <sup>19</sup>F NMR (282 MHz, CDCl<sub>3</sub>)

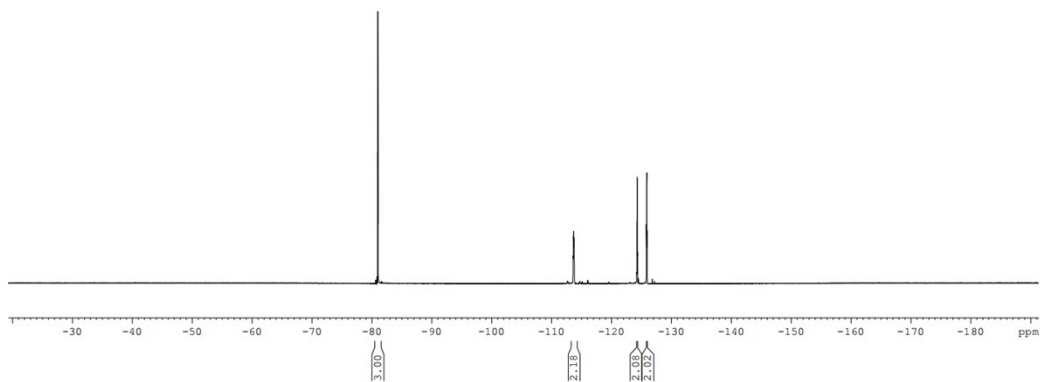

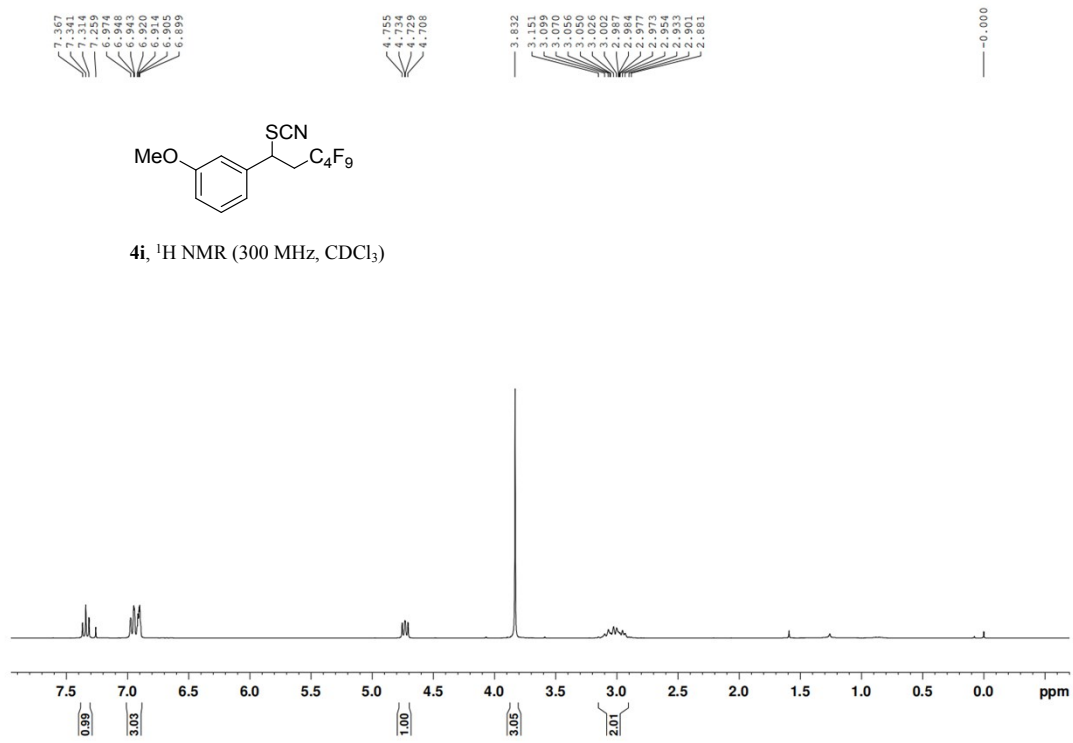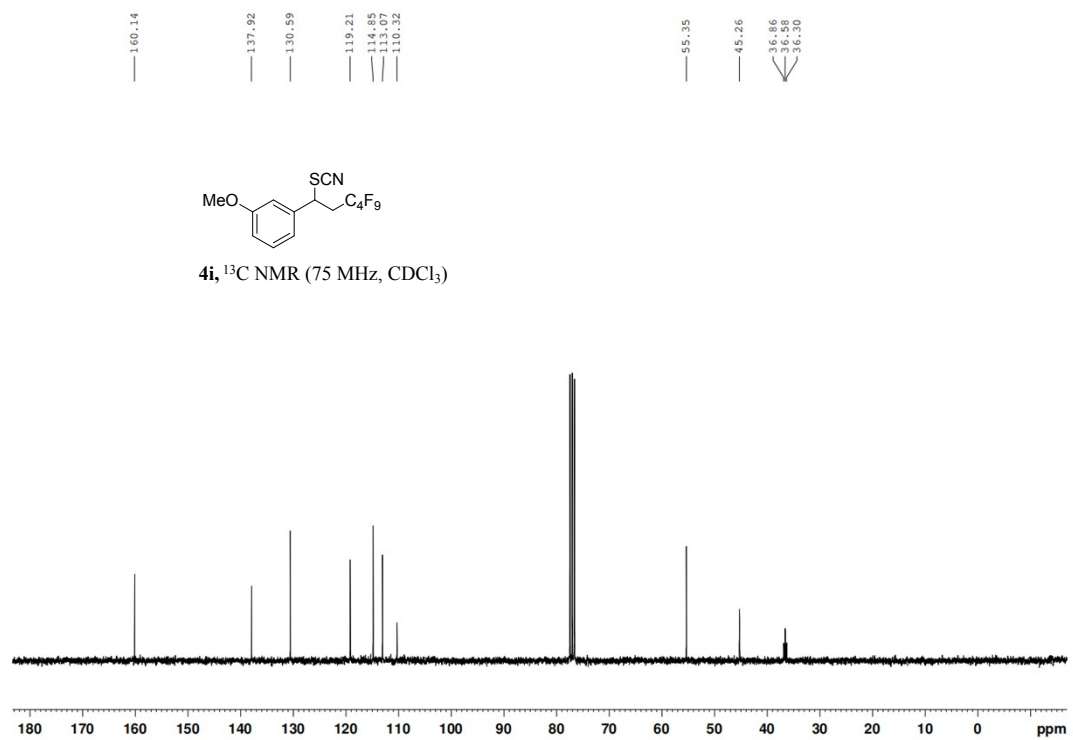



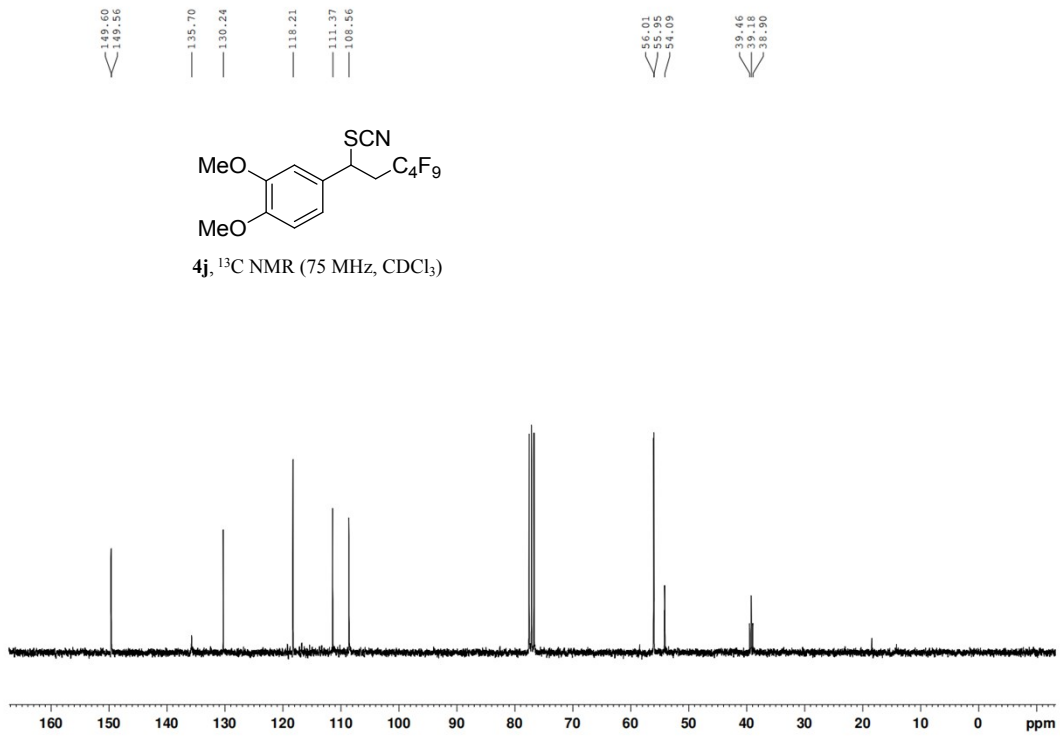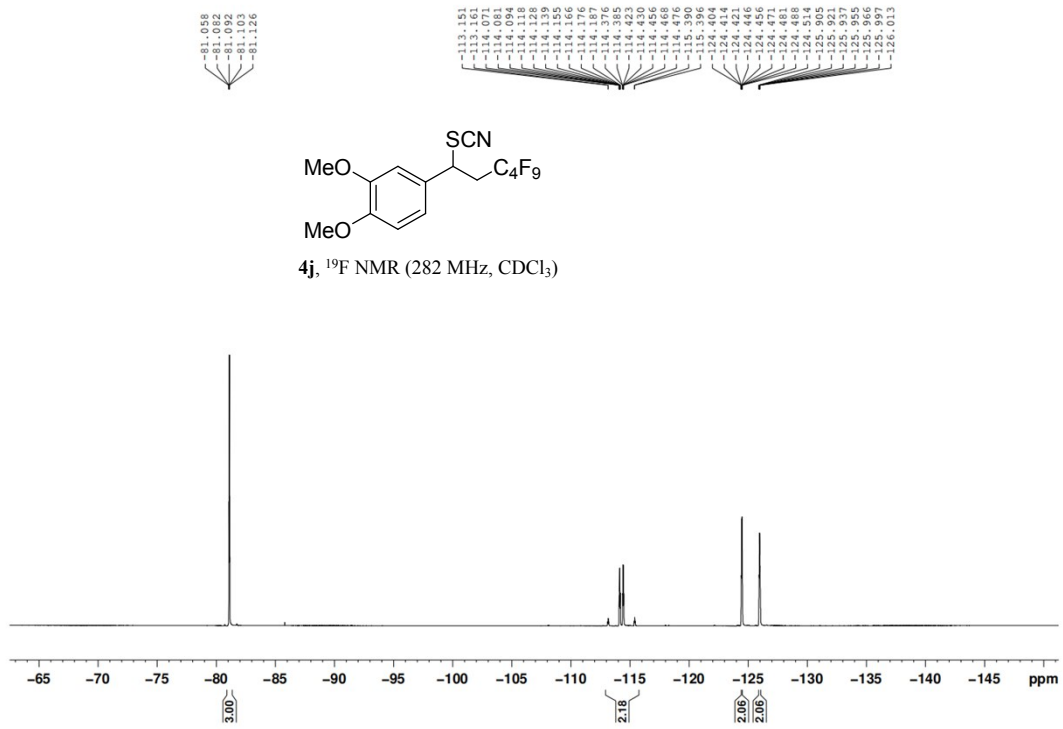

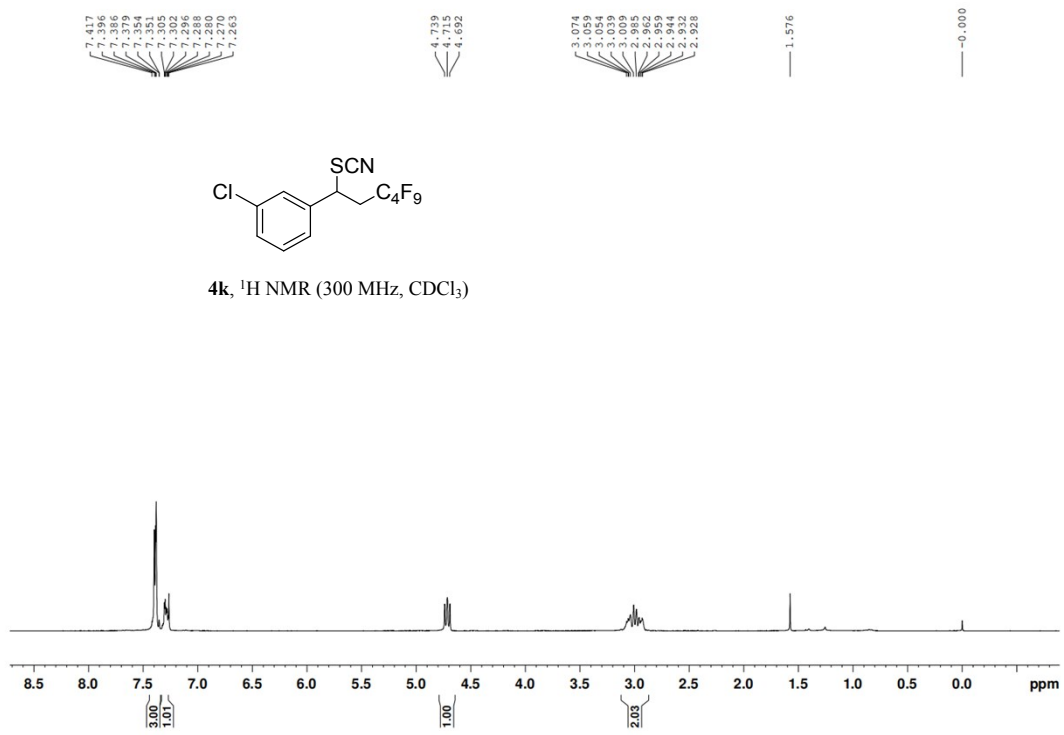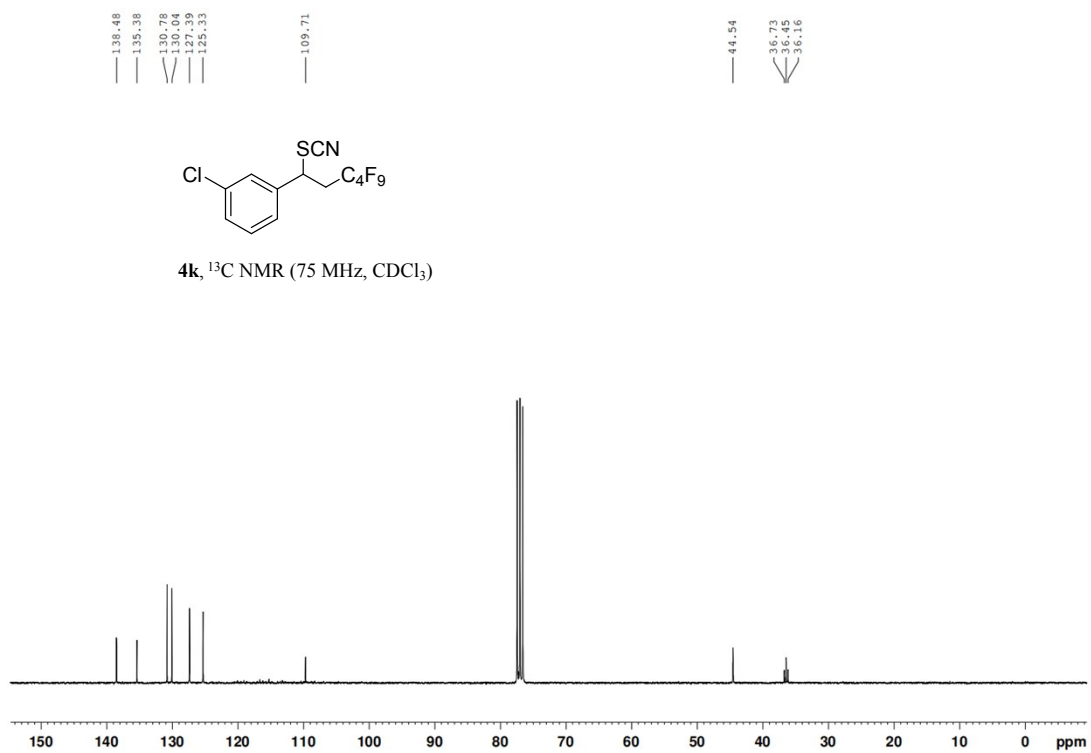

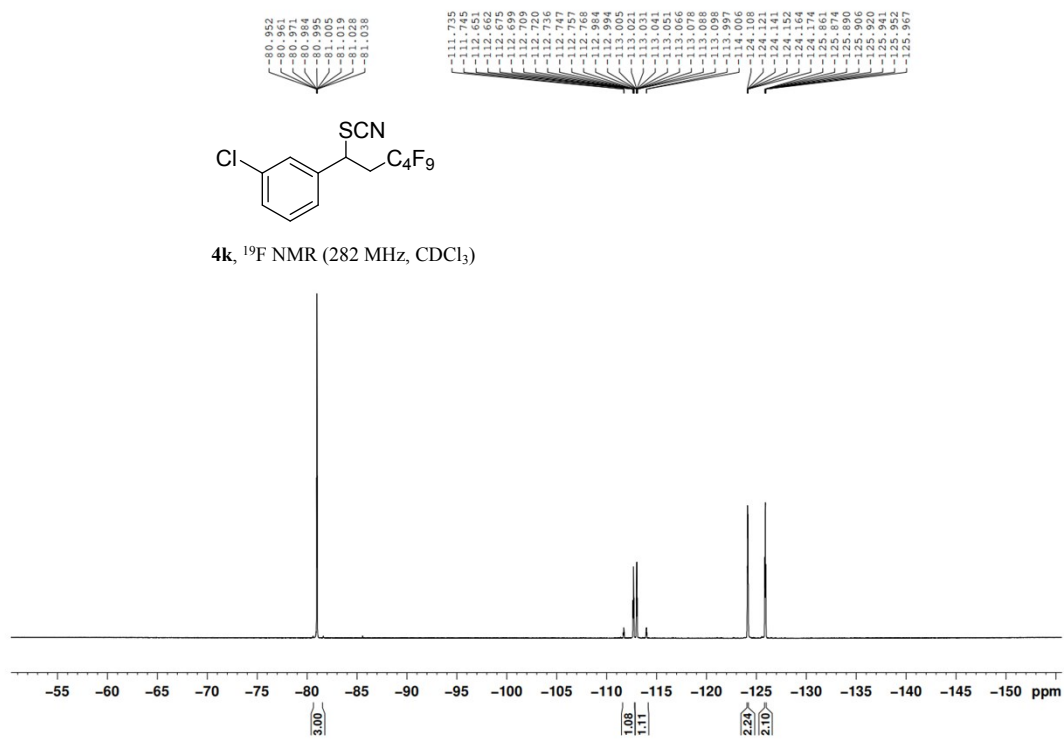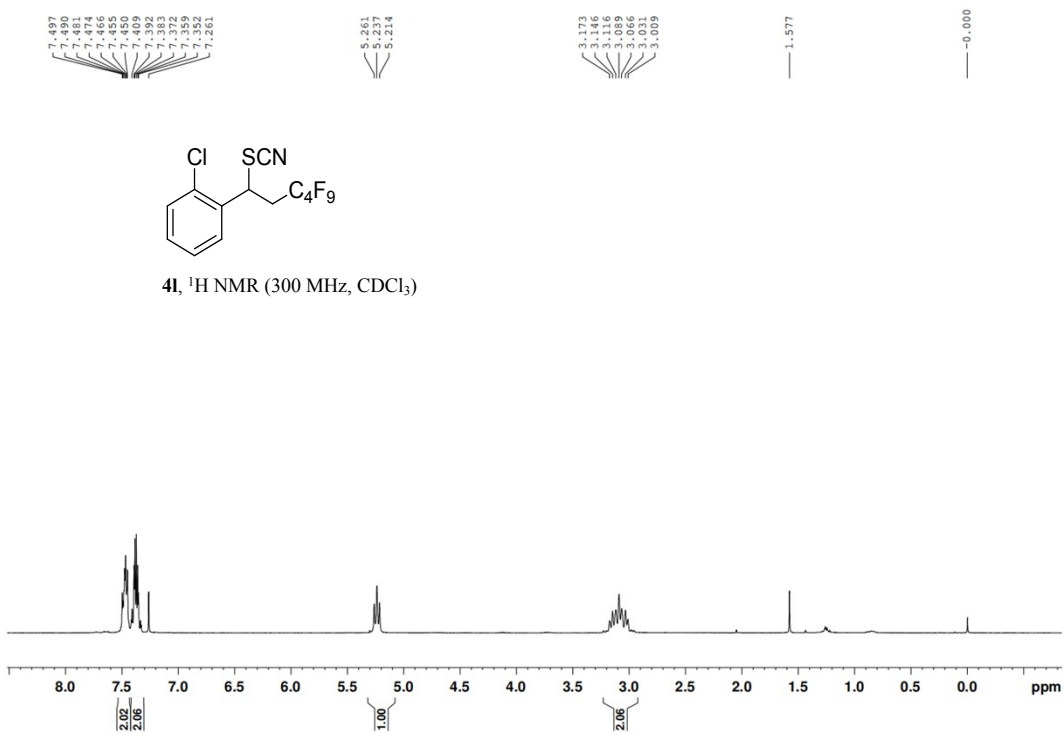

134.10  
133.27  
130.55  
127.81

109.82

41.02  
35.86  
35.58  
35.29

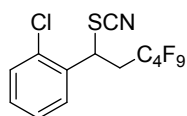

4l,  $^{13}\text{C}$  NMR (75 MHz,  $\text{CDCl}_3$ )

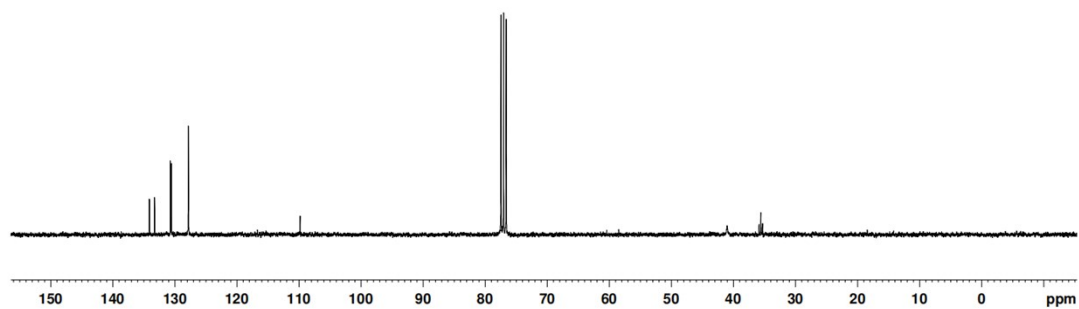

-80.559  
-80.569  
-80.584  
-81.003  
-81.003  
-81.003  
-81.037  
-81.037

-113.228  
-113.269

-124.193  
-124.206  
-124.223  
-124.240  
-124.250  
-124.274  
-125.850  
-125.899  
-125.914  
-125.944  
-125.953

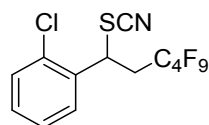

4l,  $^{19}\text{F}$  NMR (282 MHz,  $\text{CDCl}_3$ )

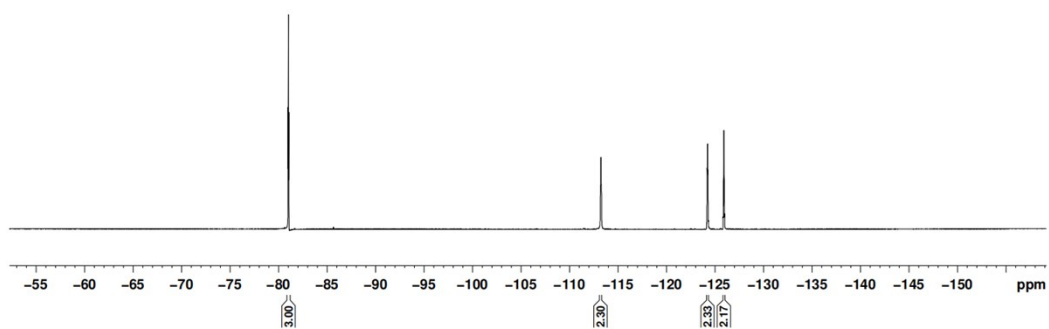



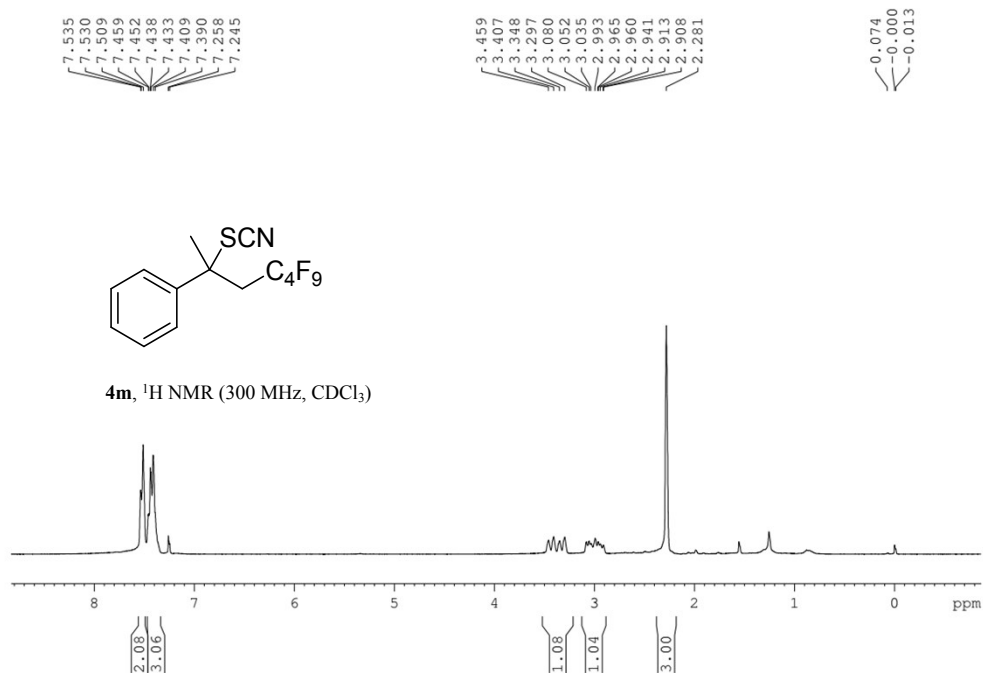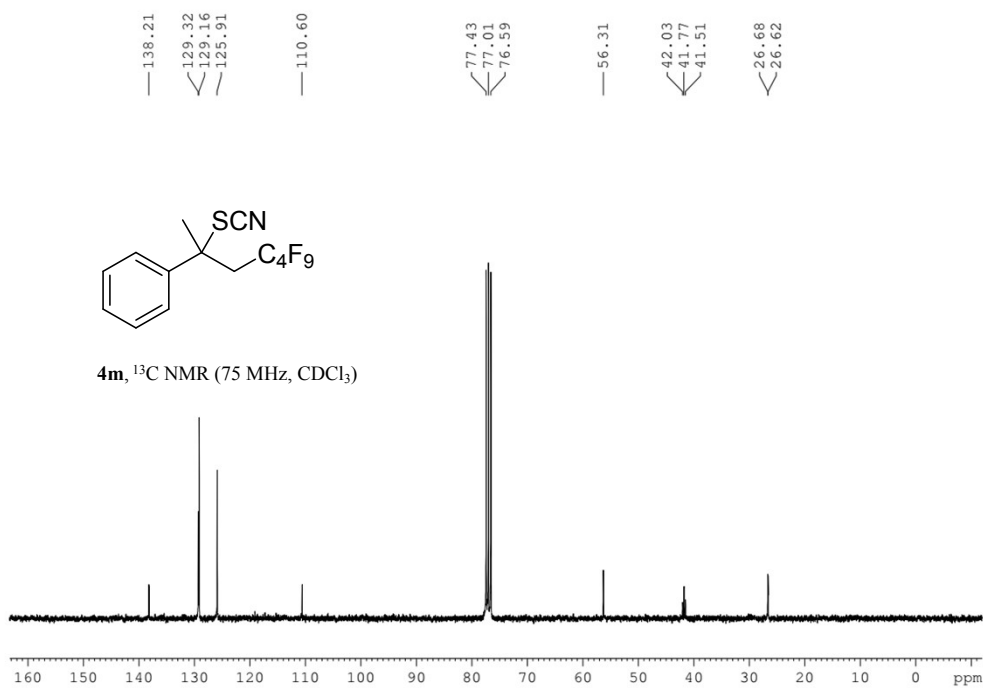

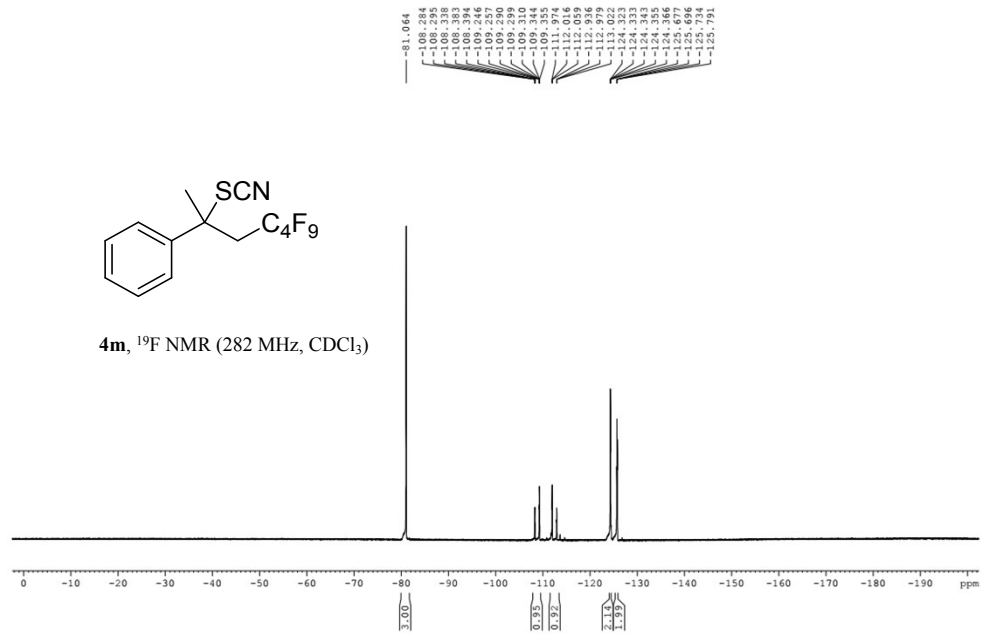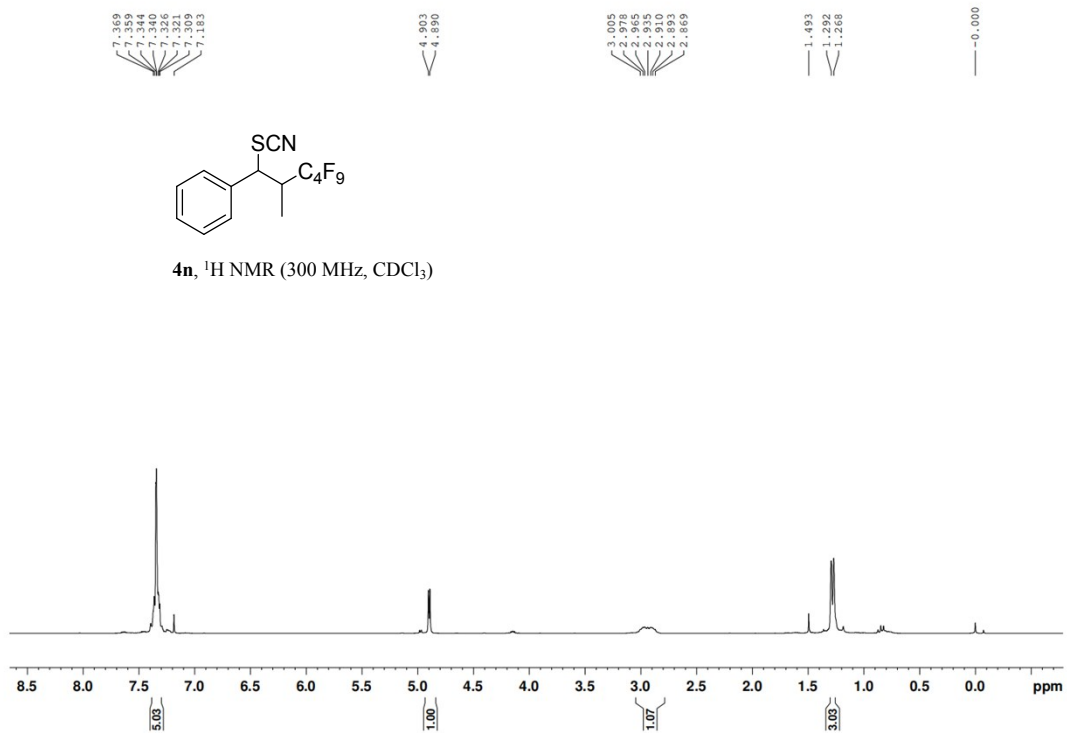

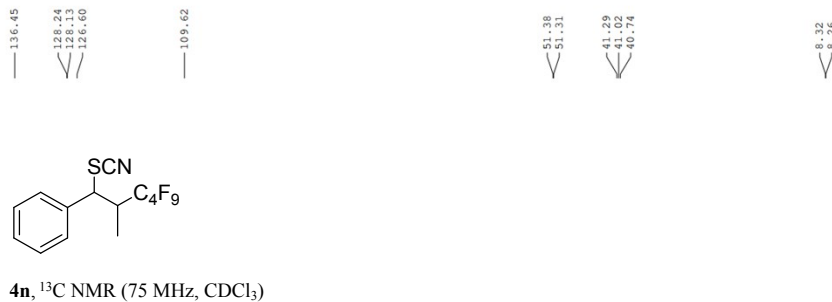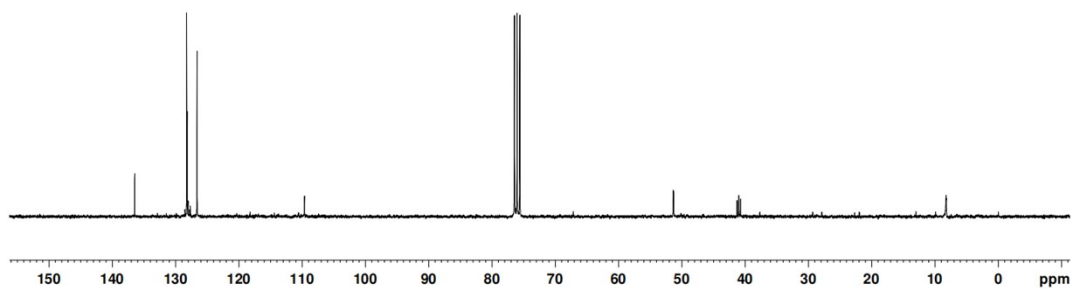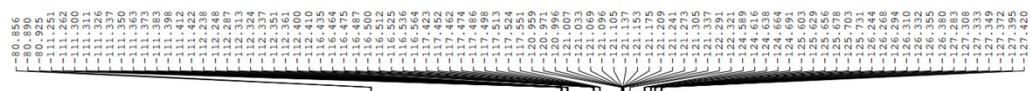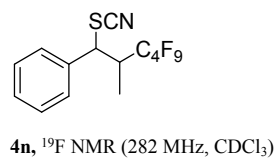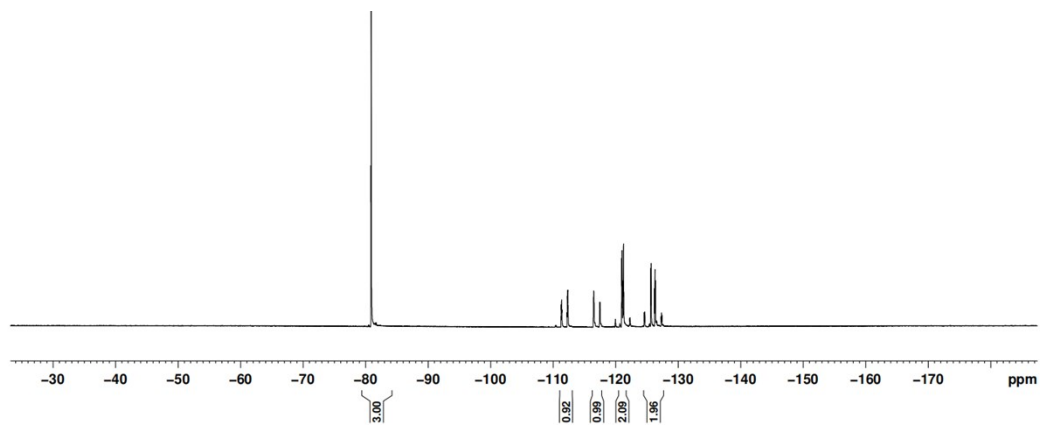

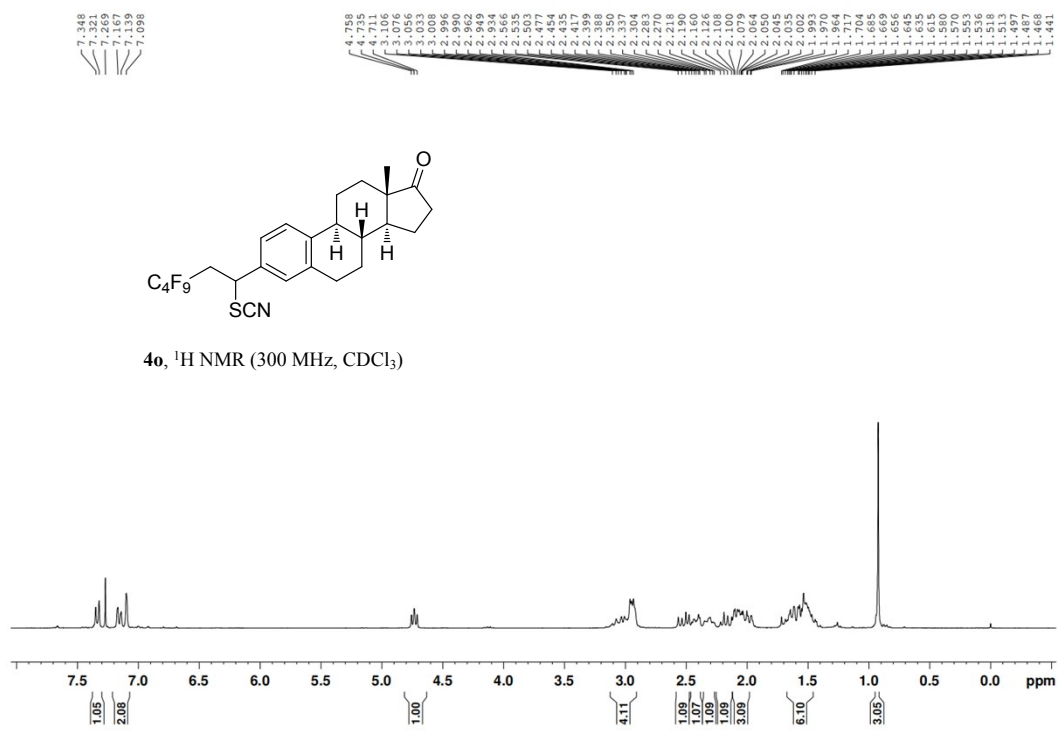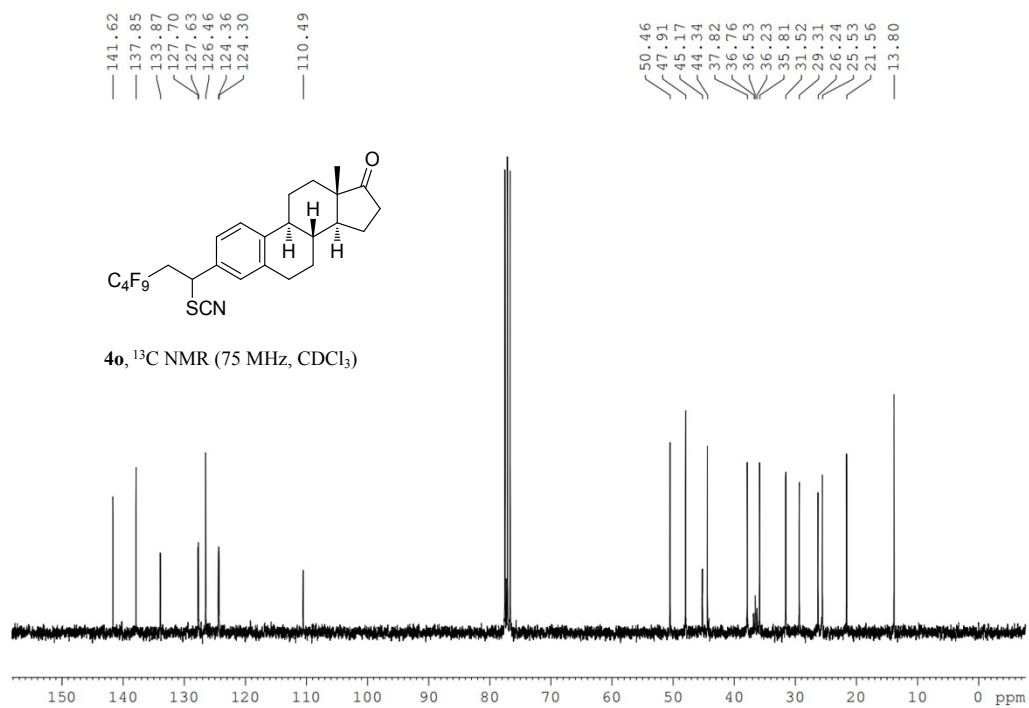

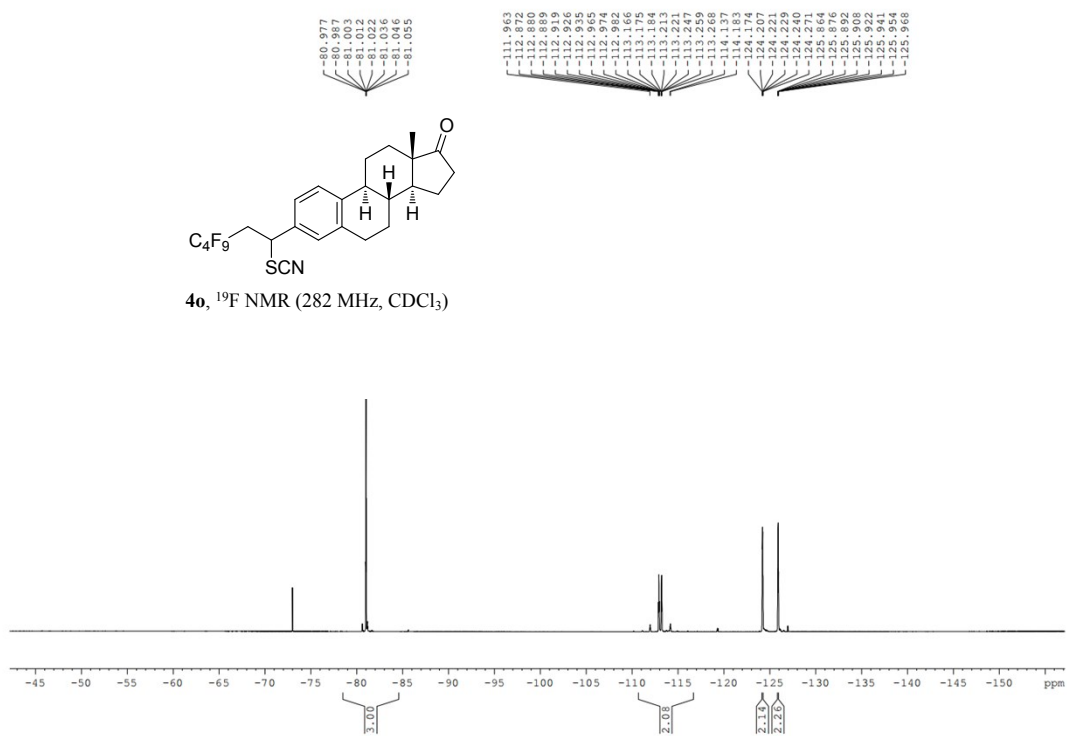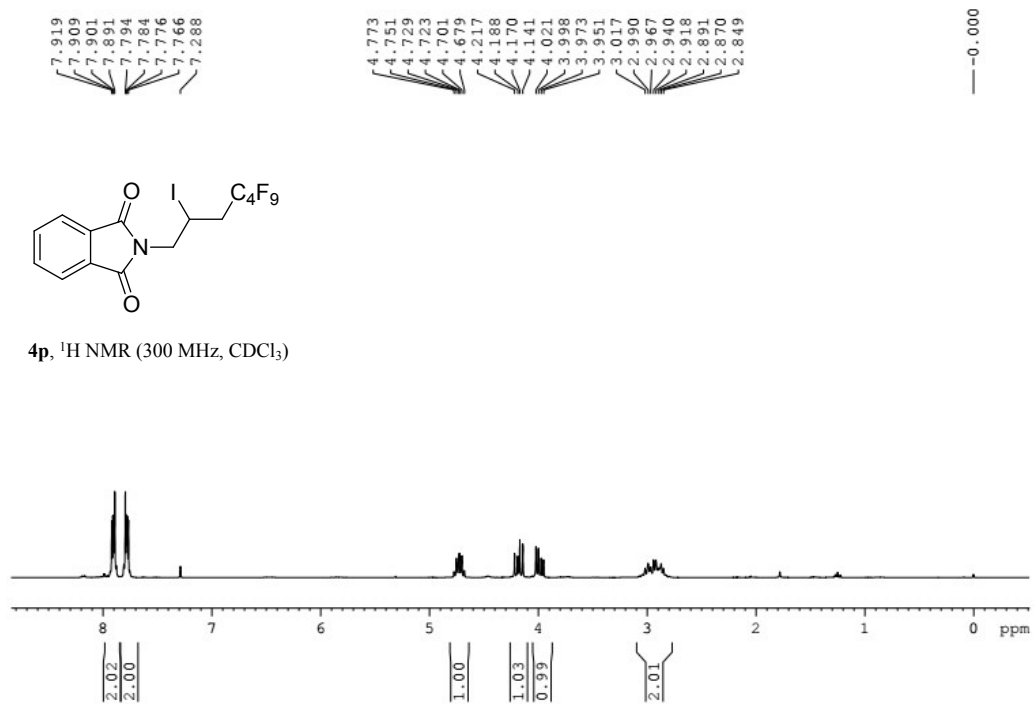

—167.65  
 —134.43  
 —131.56  
 —123.71  
 77.45  
 77.03  
 76.61  
 45.84  
 45.81  
 39.64  
 39.35  
 39.07  
 —13.14

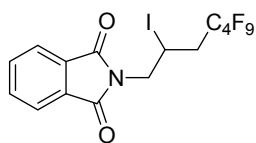

4p,  $^{13}\text{C}$  NMR (75 MHz,  $\text{CDCl}_3$ )

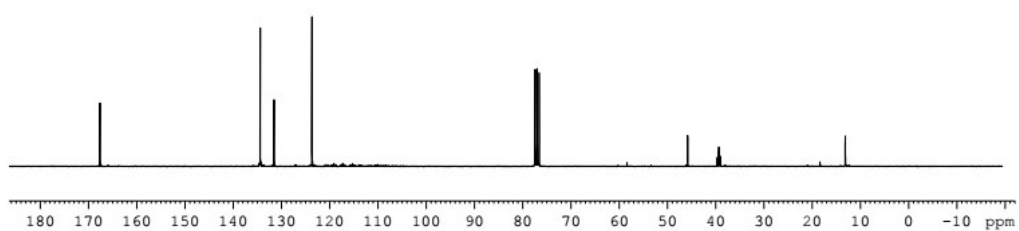

-81.073  
 -81.097  
 -81.107  
 -81.117  
 -81.142  
 -111.785  
 -111.795  
 -112.698  
 -112.707  
 -112.719  
 -112.735  
 -112.745  
 -112.754  
 -112.764  
 -112.782  
 -112.792  
 -112.800  
 -113.644  
 -113.685  
 -113.692  
 -113.733  
 -114.644  
 -114.652  
 -124.442  
 -124.450  
 -124.475  
 -124.494  
 -124.500  
 -124.509  
 -124.543  
 -125.956  
 -125.972  
 -125.990  
 -126.002  
 -126.012  
 -126.018  
 -126.049  
 -126.065

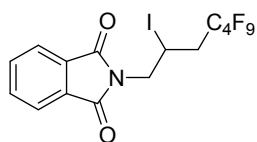

4p,  $^{19}\text{F}$  NMR (282 MHz,  $\text{CDCl}_3$ )

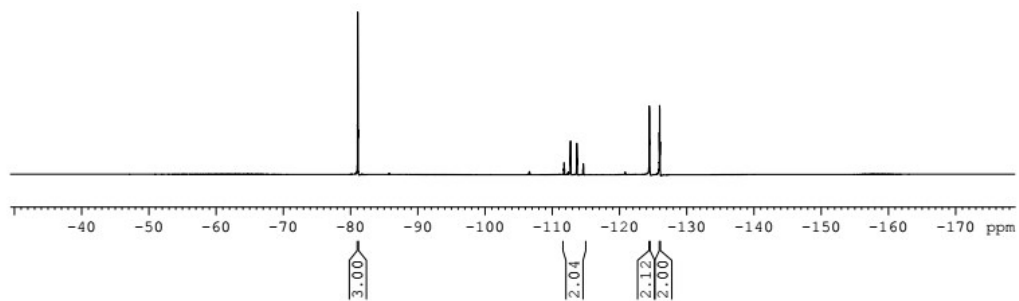

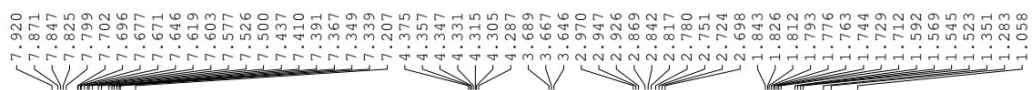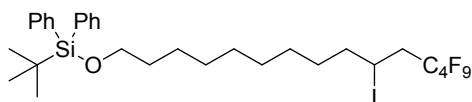

**4q**,  $^1\text{H}$  NMR (300 MHz,  $\text{CDCl}_3$ )

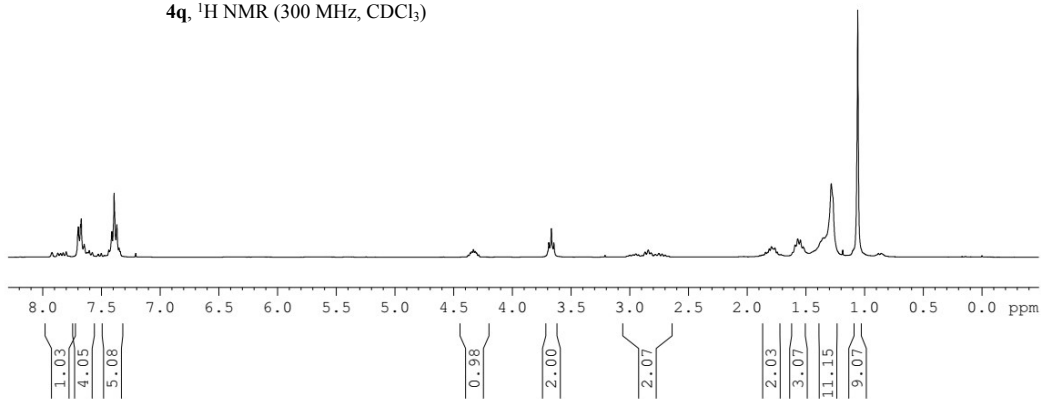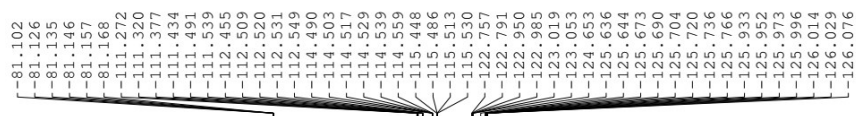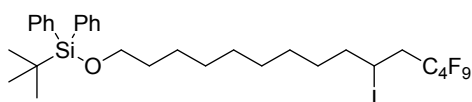

**4q**,  $^{19}\text{F}$  NMR (282 MHz,  $\text{CDCl}_3$ )

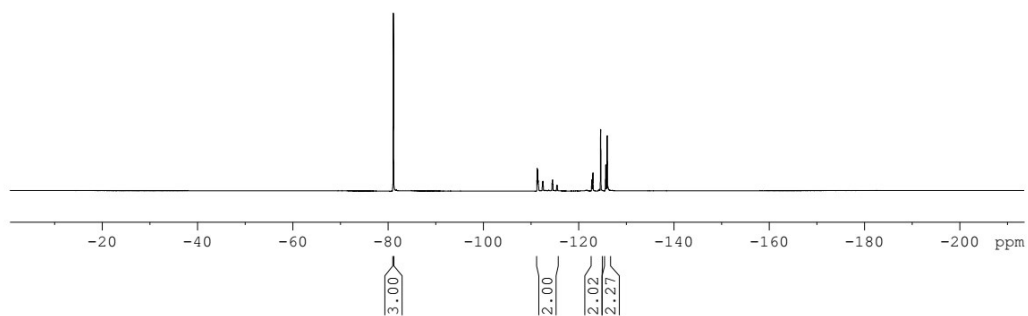





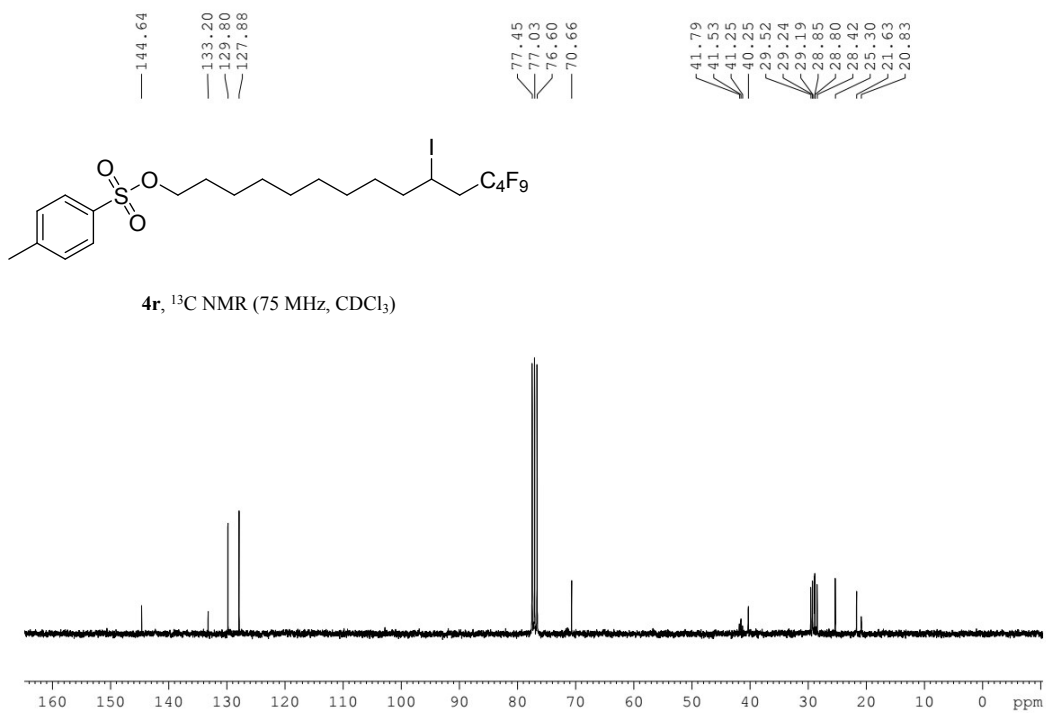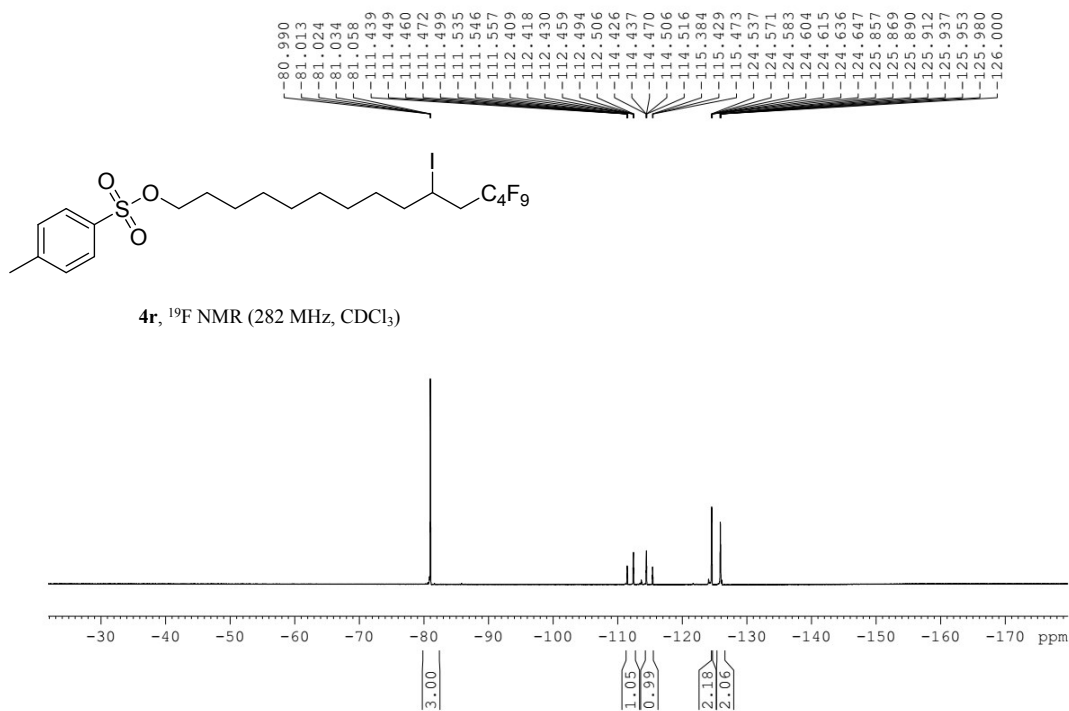

7.853  
7.831  
7.825  
7.812  
7.790  
7.785  
7.541  
7.536  
7.531  
7.529  
7.516  
7.512  
7.493  
7.488  
7.482  
7.473  
7.462  
7.454  
7.449  
7.443  
7.438  
7.427  
7.420  
7.415  
7.410  
7.285  
4.352  
4.342  
4.326  
4.309  
4.300  
4.062  
4.040  
4.018  
3.995  
2.947  
2.872  
2.869  
2.843  
2.820  
2.755  
1.841  
1.825  
1.811  
1.793  
1.783  
1.770  
1.755  
1.732  
1.706  
1.684  
1.538  
1.522  
1.512  
1.421  
1.393  
1.350  
1.287

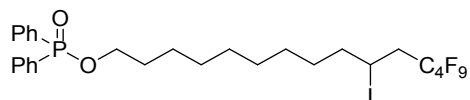

4s, <sup>1</sup>H NMR (300 MHz, CDCl<sub>3</sub>)

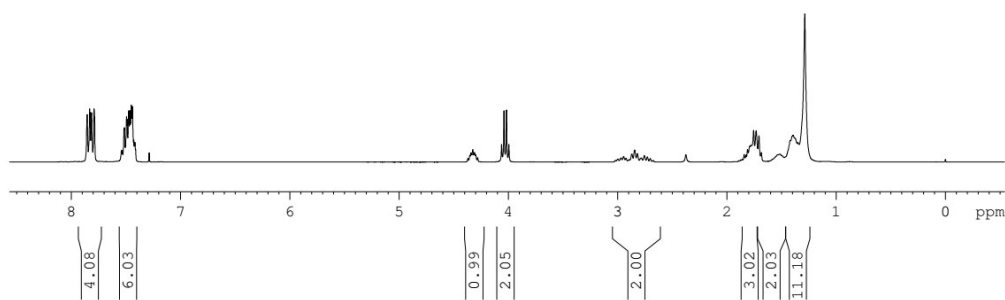

132.58  
132.08  
132.04  
131.68  
131.55  
130.77  
128.57  
128.40  
77.51  
77.08  
76.66  
65.00  
64.92  
41.78  
41.50  
41.23  
40.26  
30.55  
30.47  
29.52  
29.32  
29.24  
29.04  
28.43  
25.56  
20.78

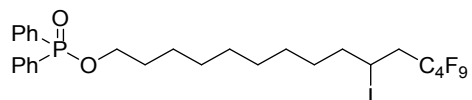

4s, <sup>13</sup>C NMR (75 MHz, CDCl<sub>3</sub>)

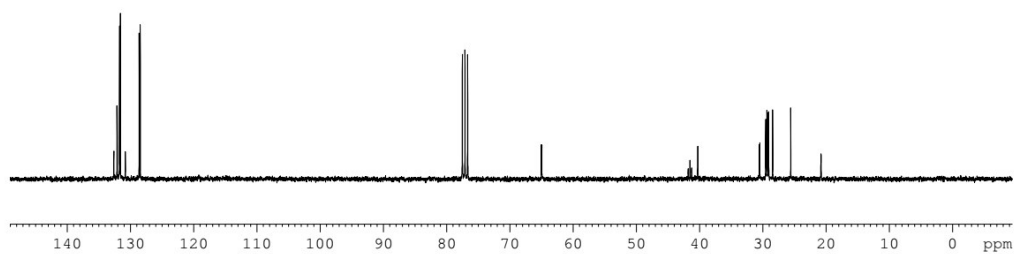

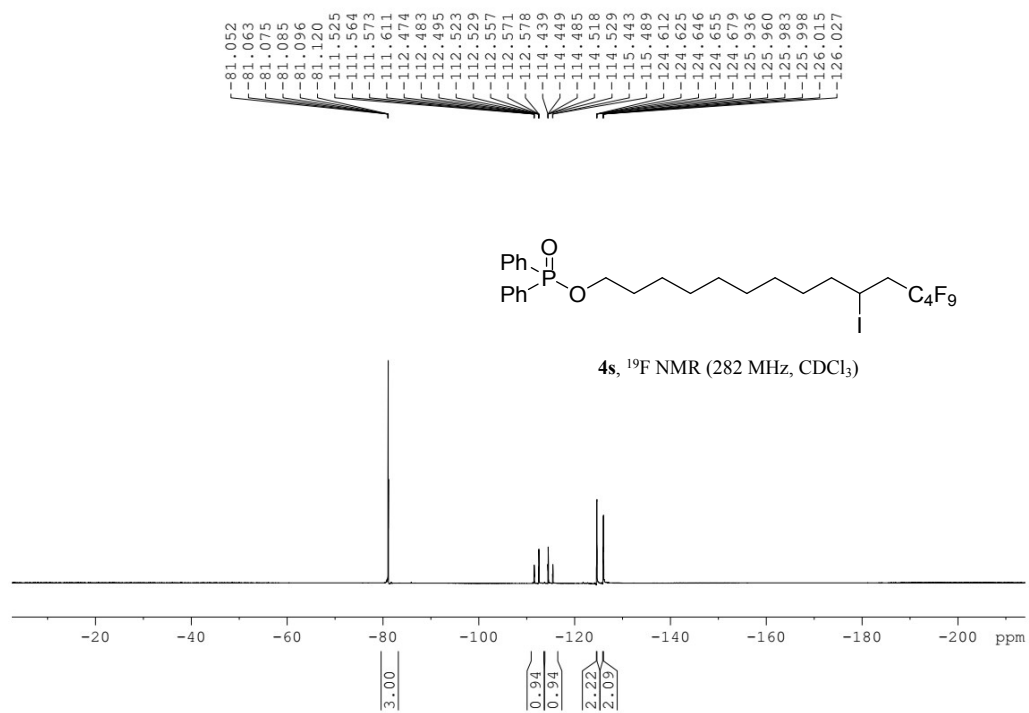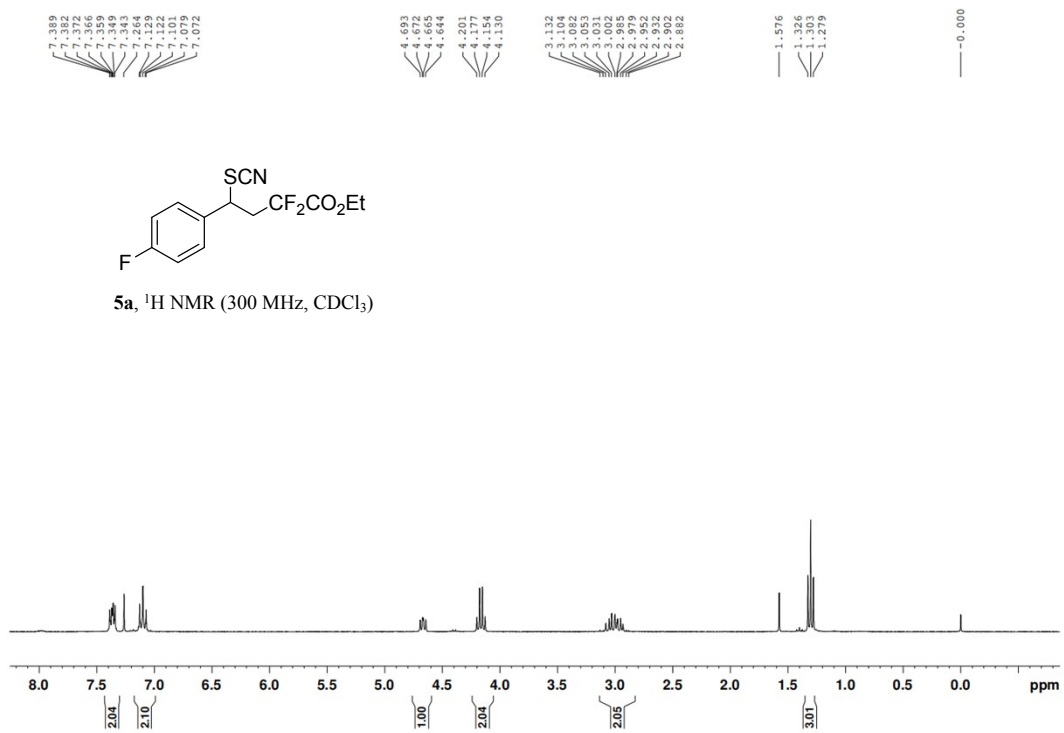

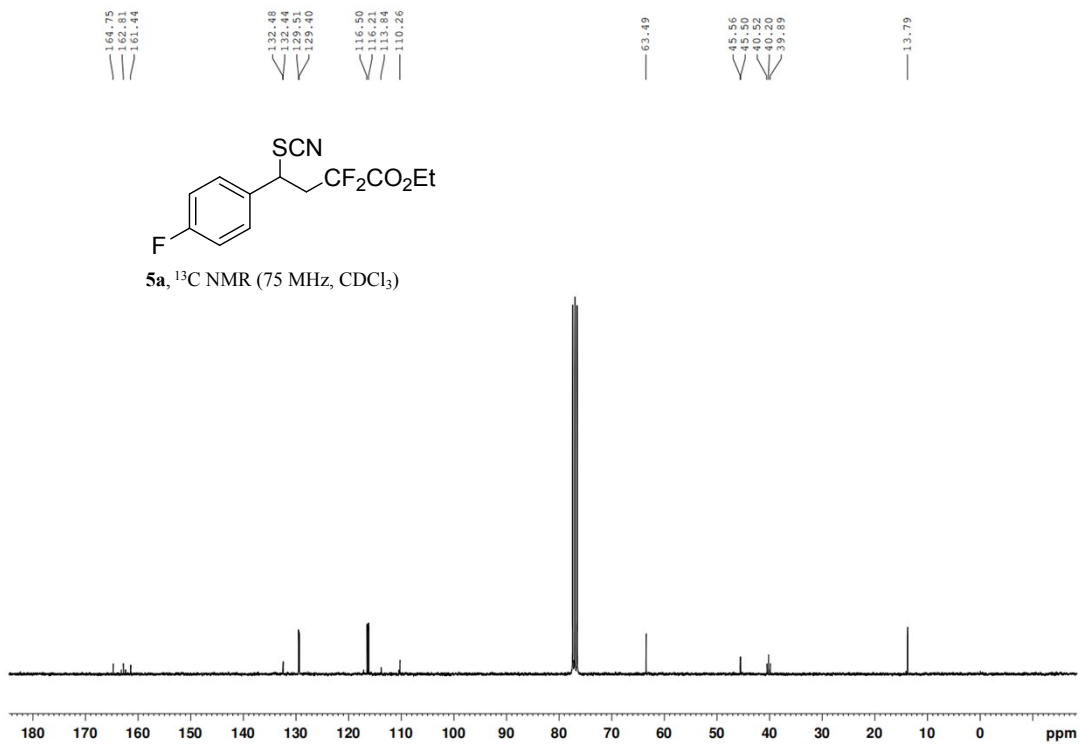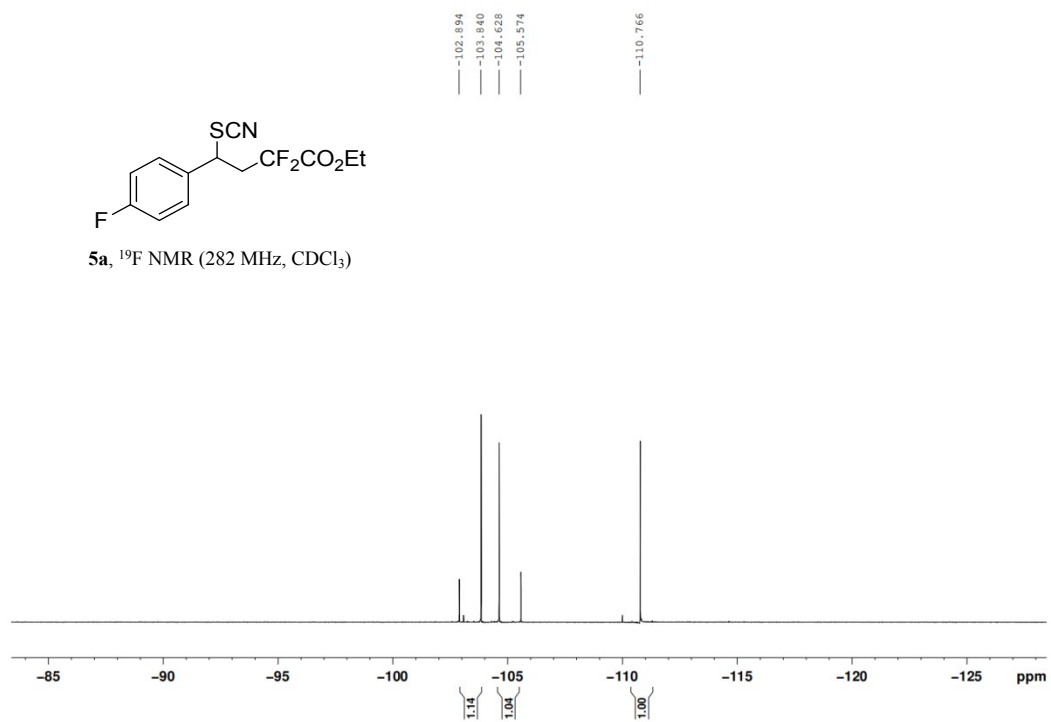

7.560  
7.531  
7.285  
7.253

4.649  
4.628  
4.602  
4.601  
4.213  
4.189  
4.165  
4.141

3.067  
3.040  
3.018  
3.011  
2.996  
2.988  
2.975  
2.942  
2.938  
2.922

1.578  
1.320  
1.306  
1.282

-0.000

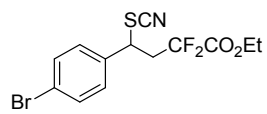

**5b**,  $^1\text{H}$  NMR (300 MHz,  $\text{CDCl}_3$ )

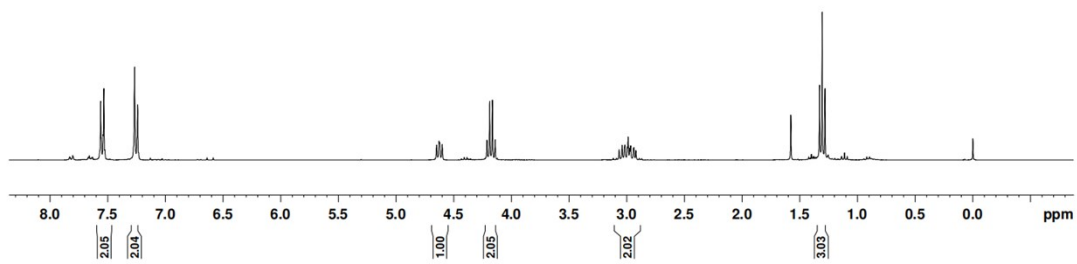

135.69  
132.47  
129.10  
123.77

110.44  
107.09

63.95

45.63  
45.57  
45.52  
39.85  
39.62

13.79

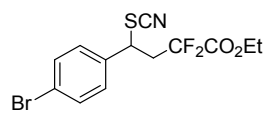

**5b**,  $^{13}\text{C}$  NMR (75 MHz,  $\text{CDCl}_3$ )

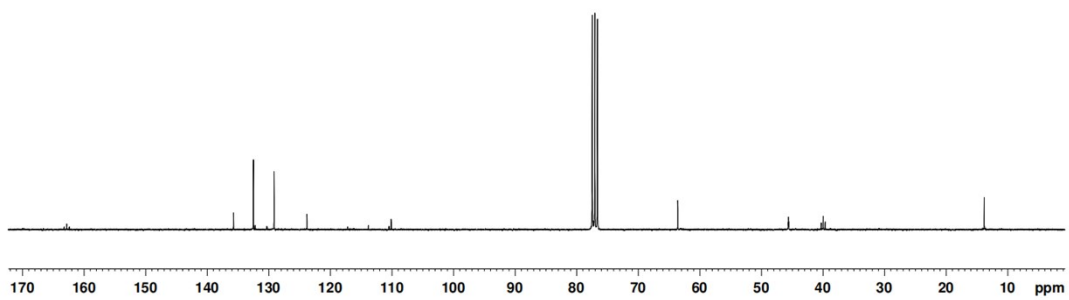

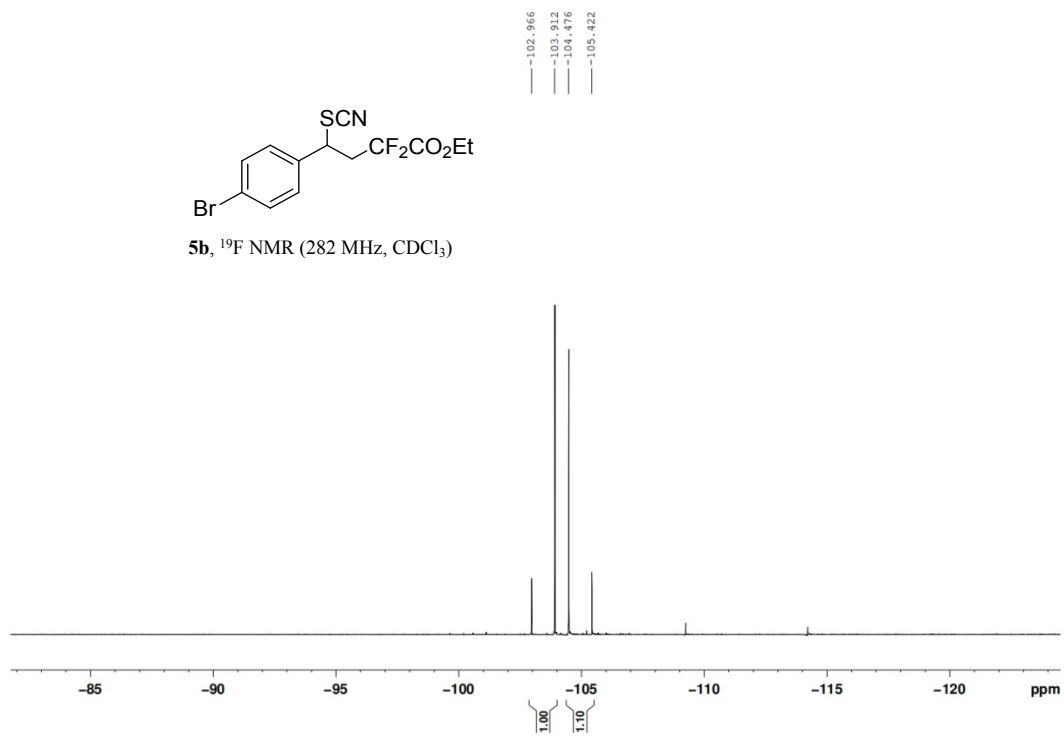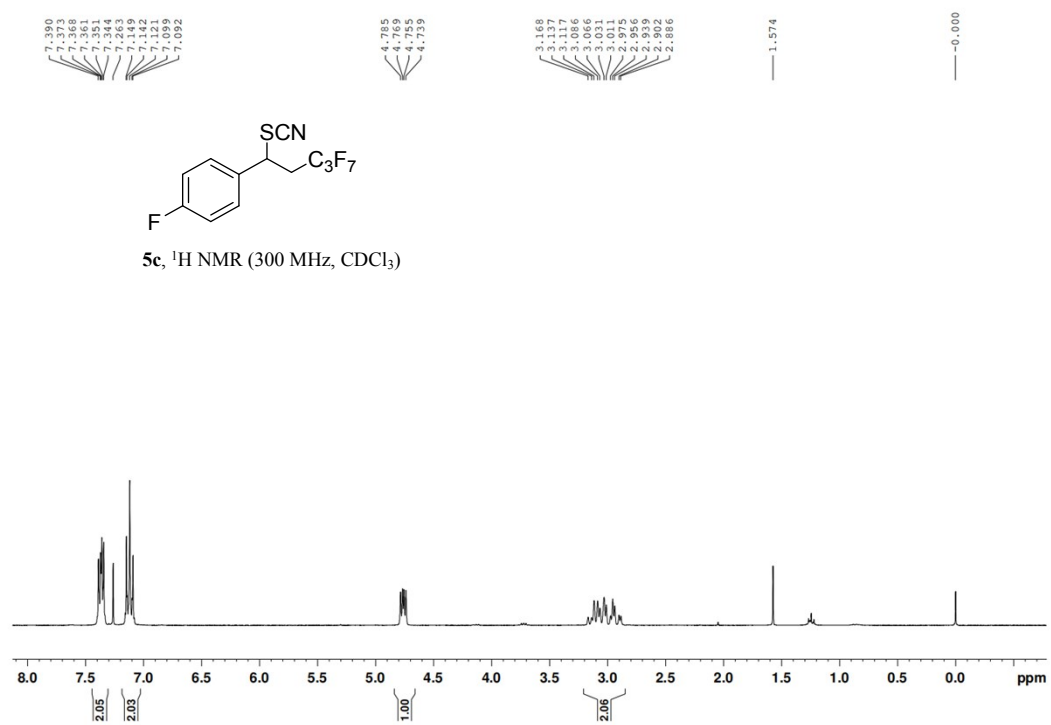

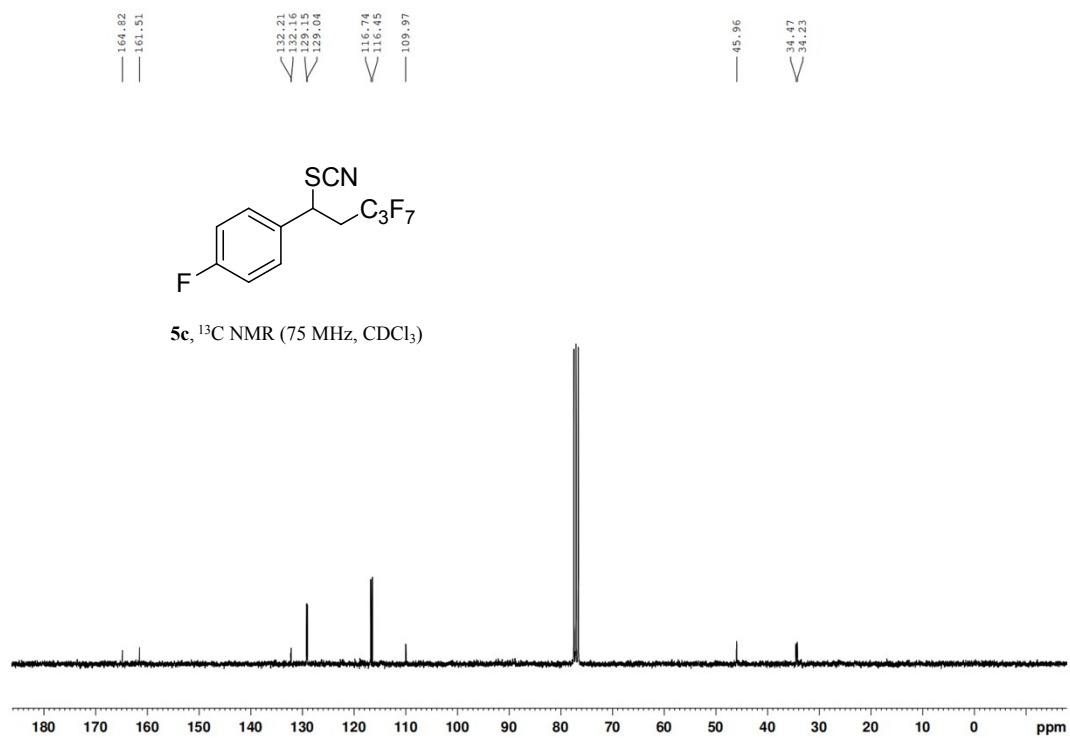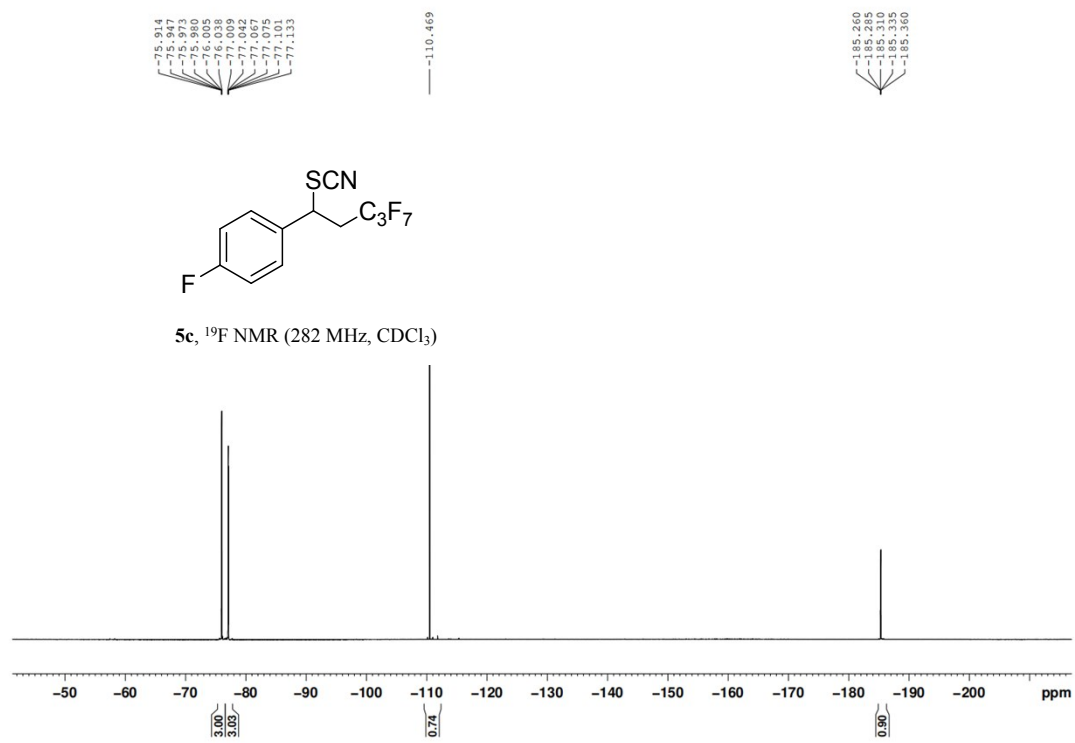

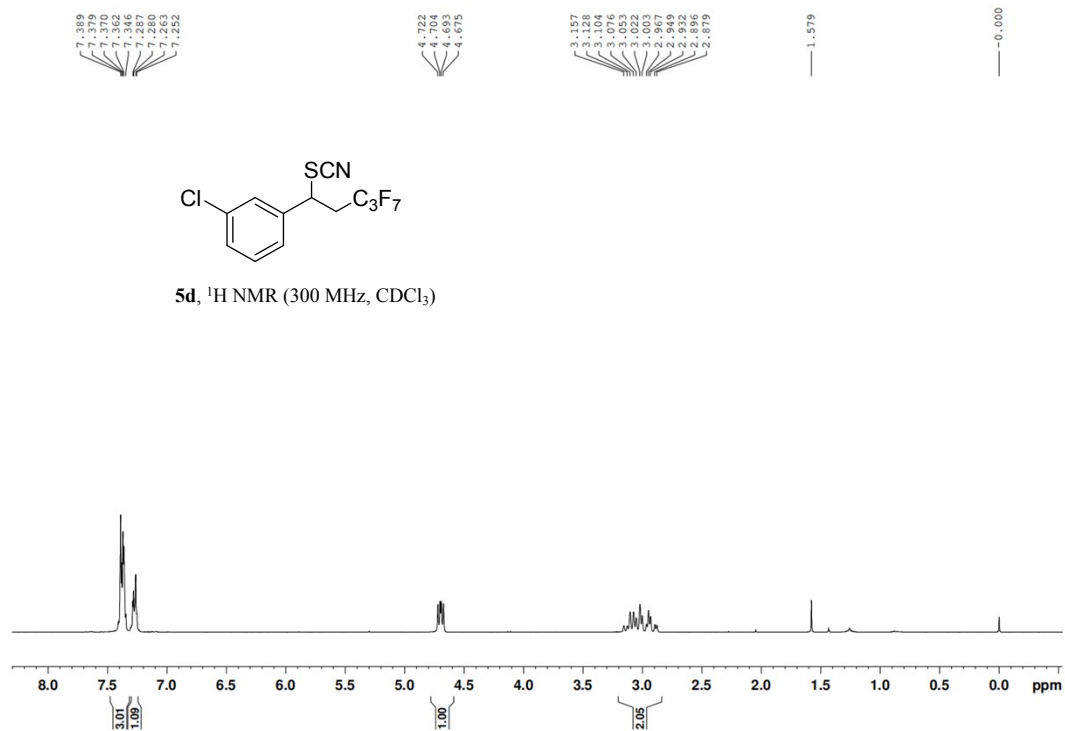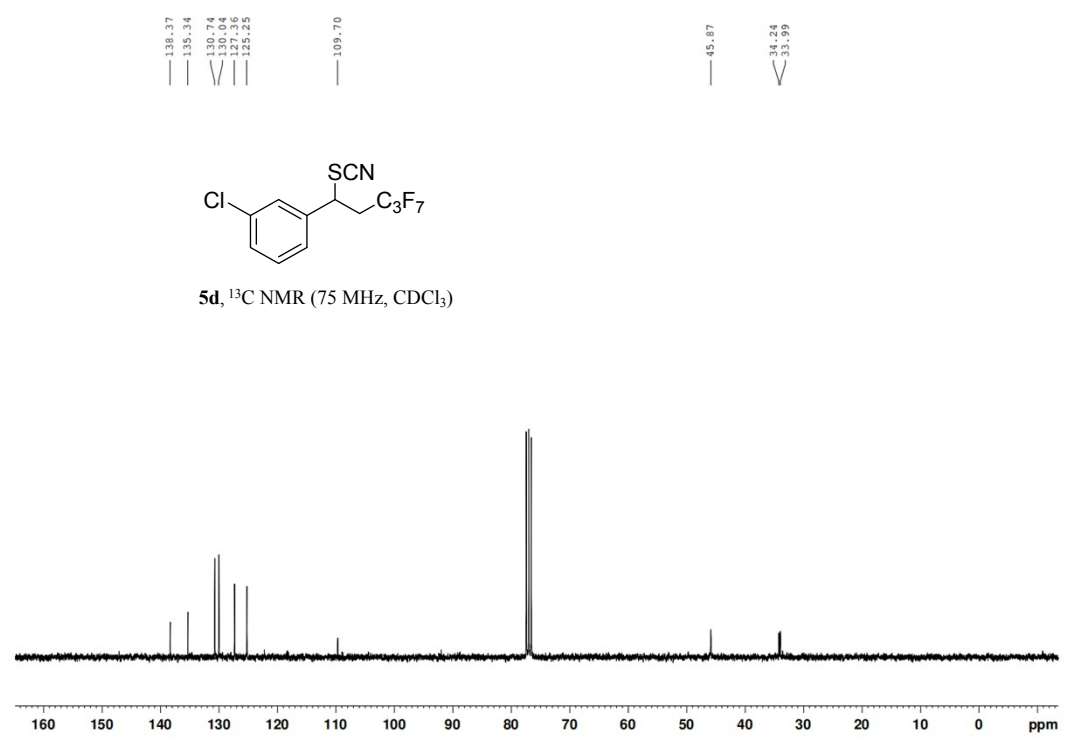



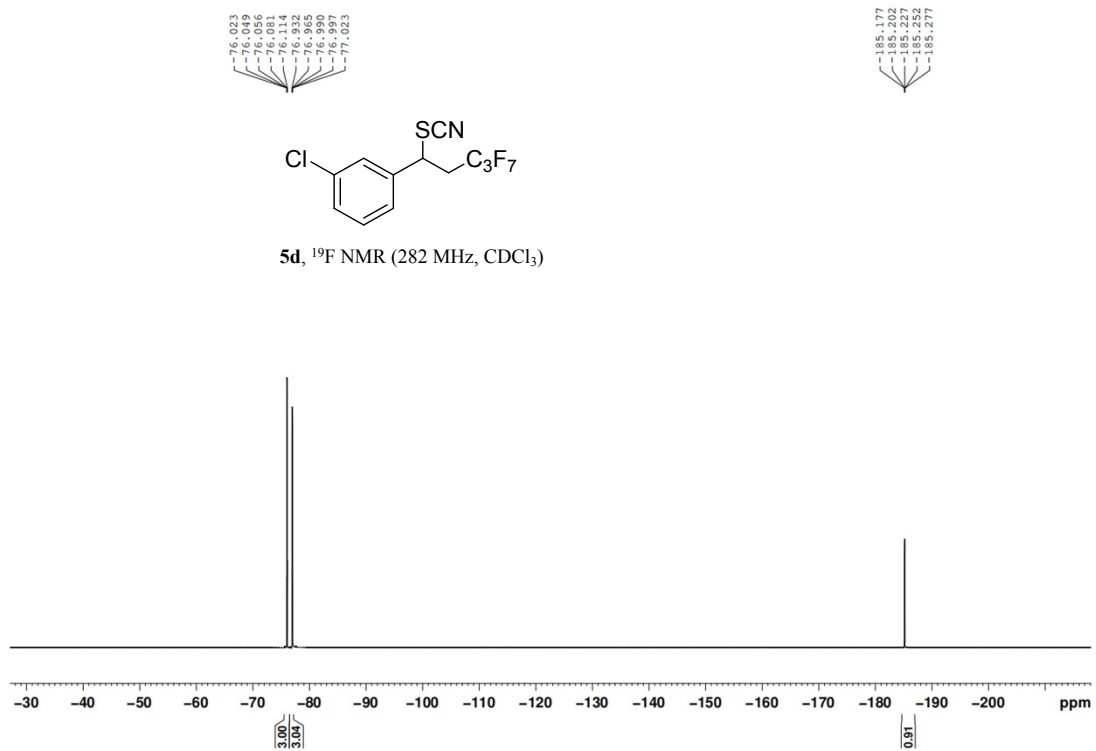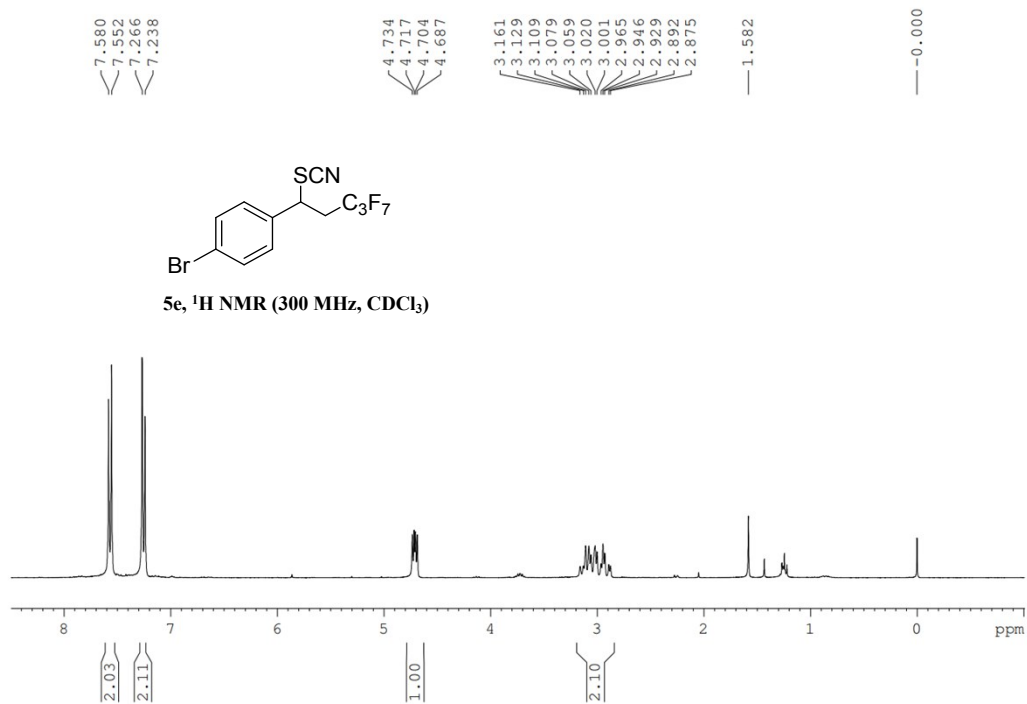

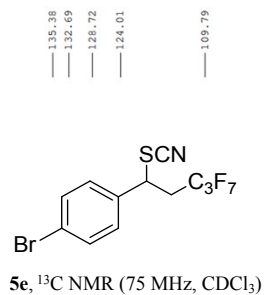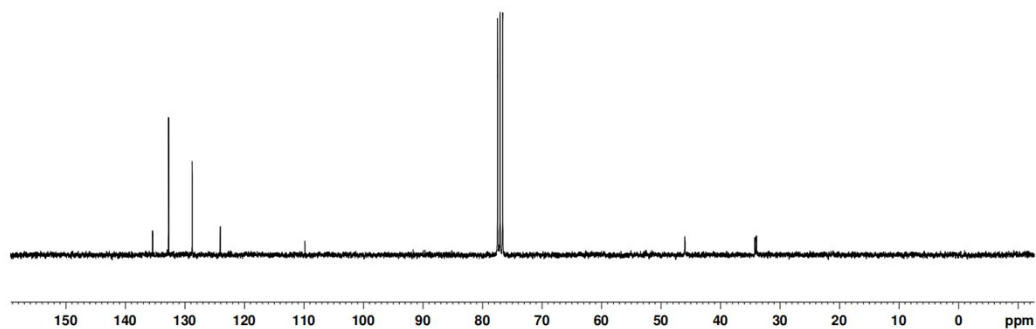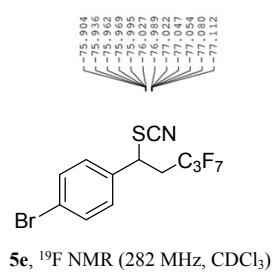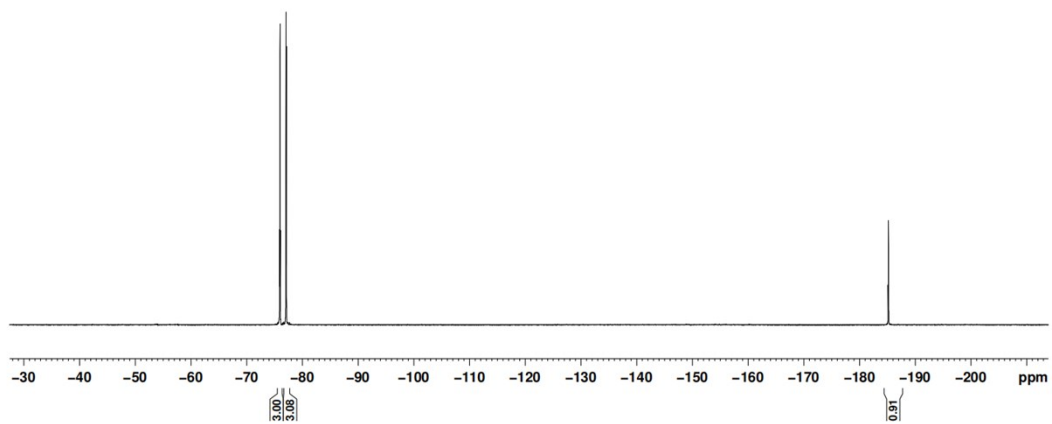

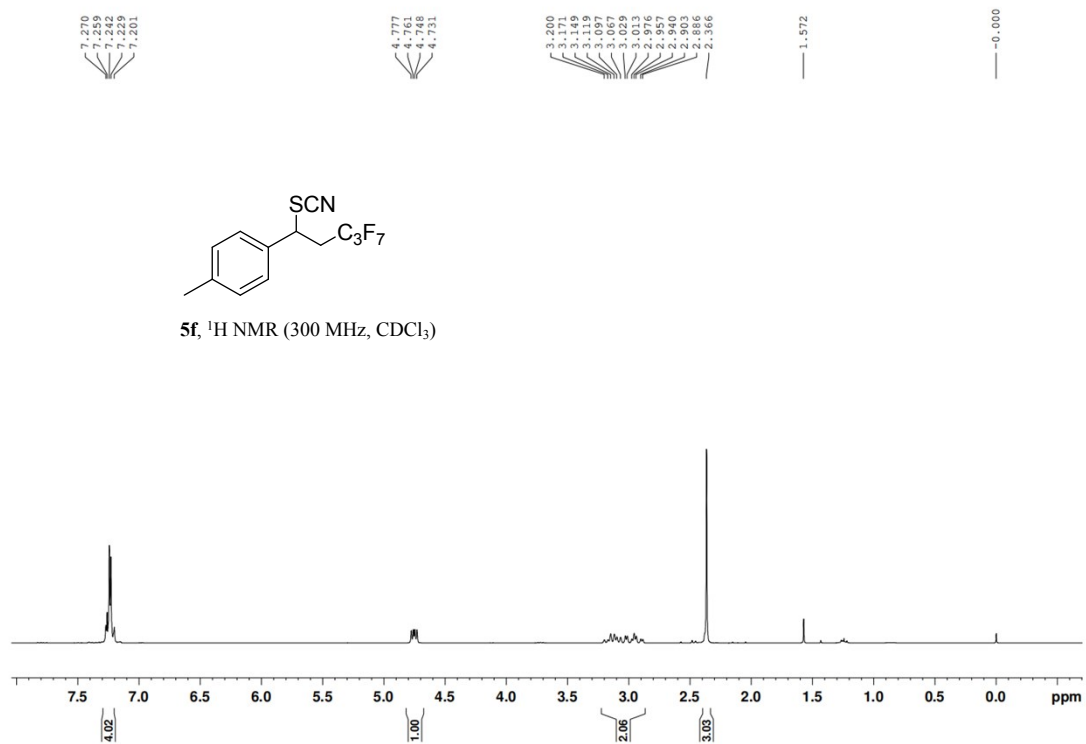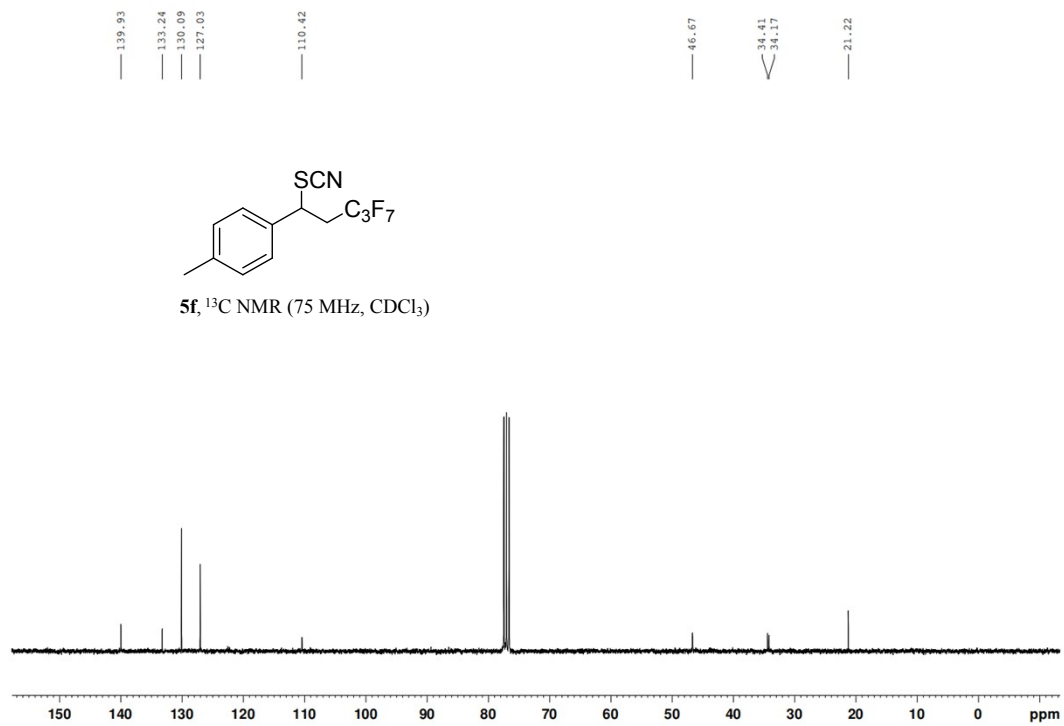

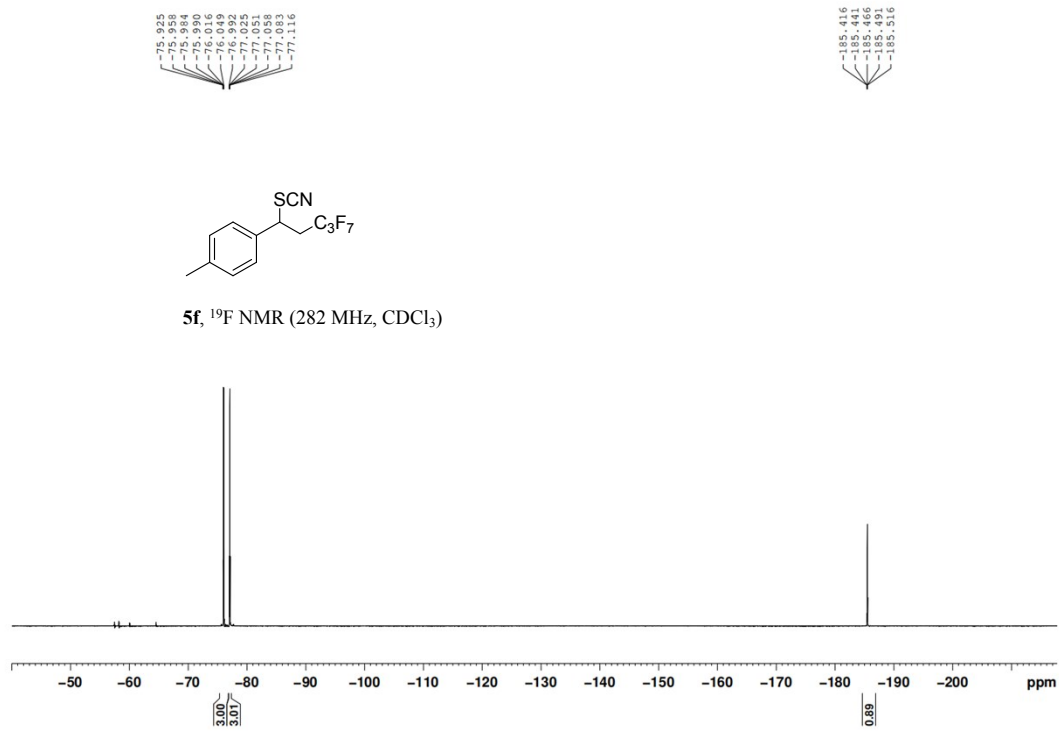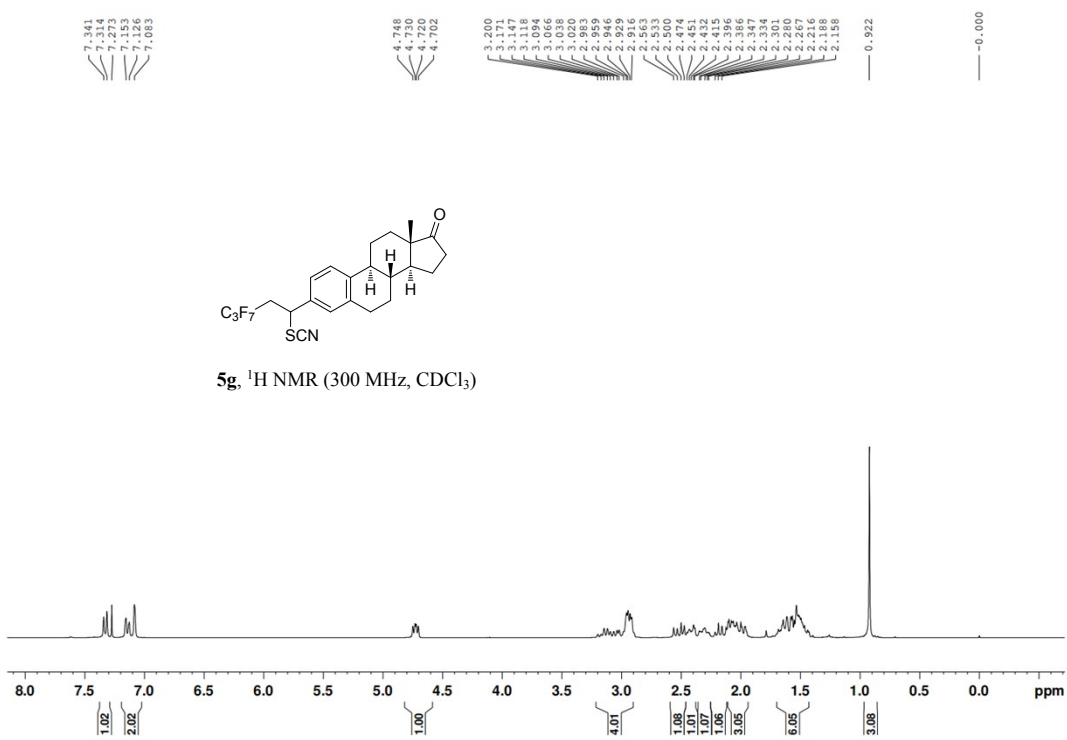

141.62  
137.80  
133.77  
127.66  
127.59  
126.32  
124.24  
110.49

50.45  
47.90  
46.53  
44.33  
37.80  
35.81  
31.82  
29.31  
26.25  
25.52  
21.56  
13.80

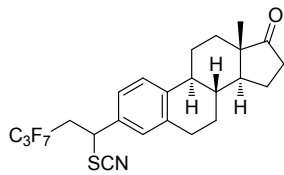

**5g**, <sup>13</sup>C NMR (75 MHz, CDCl<sub>3</sub>)

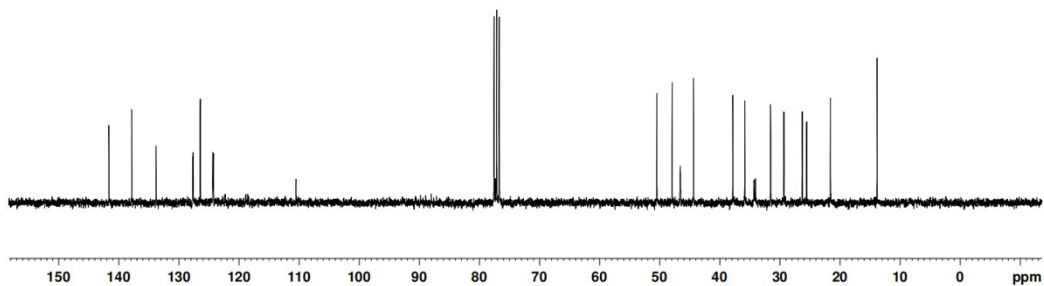

-76.015  
-76.048  
-76.074  
-76.106  
-76.139  
-76.918  
-76.952  
-76.960  
-76.985  
-77.011  
-77.018  
-77.043  
-77.051

-186.512  
-185.523  
-185.536  
-185.547  
-185.561  
-185.572

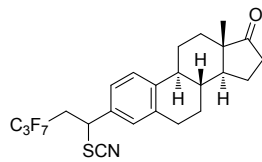

**5g**, <sup>19</sup>F NMR (282 MHz, CDCl<sub>3</sub>)

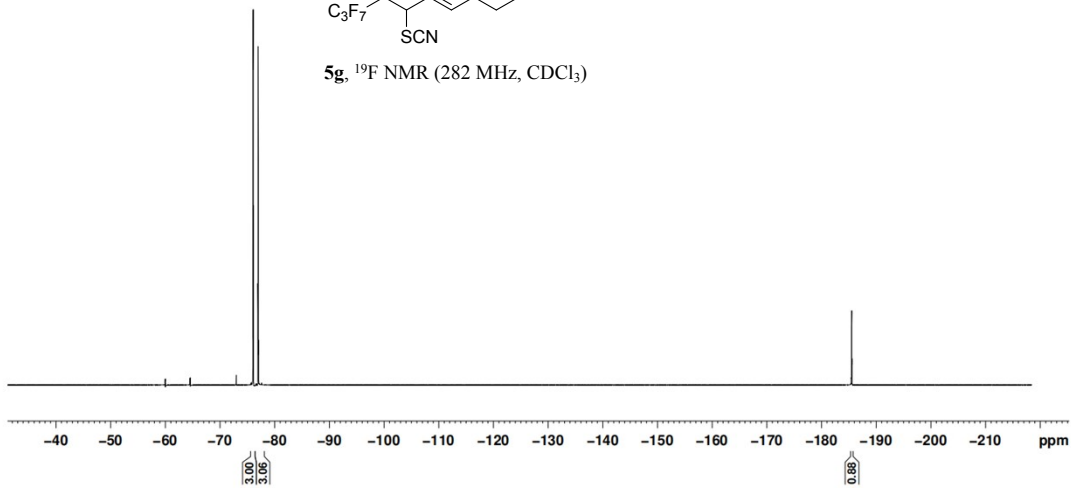

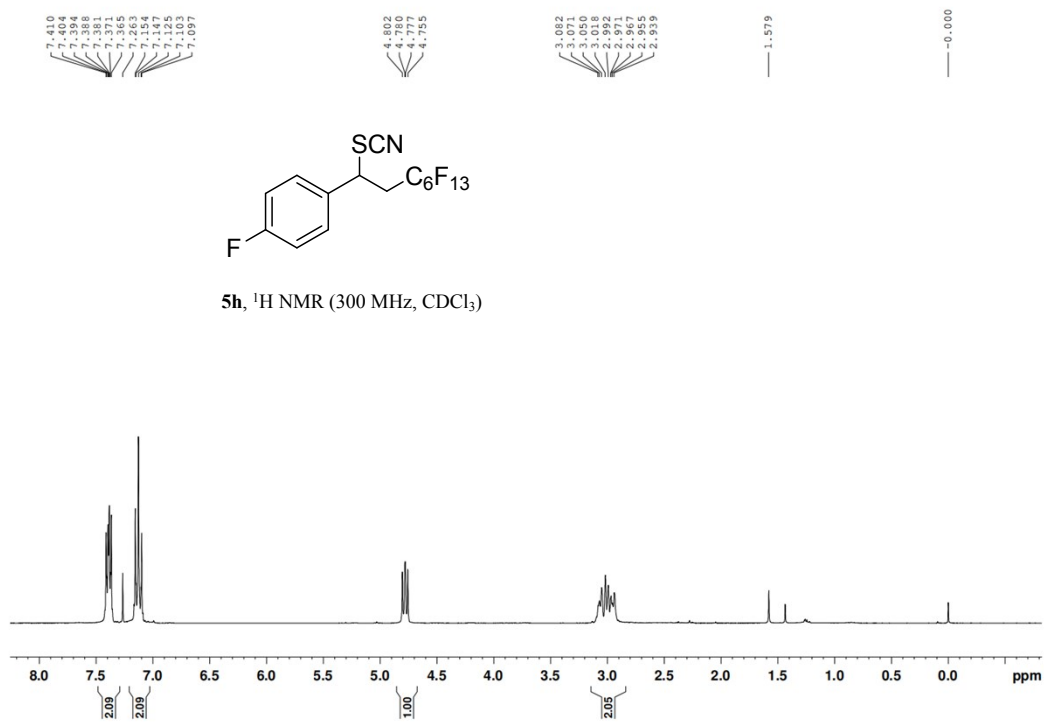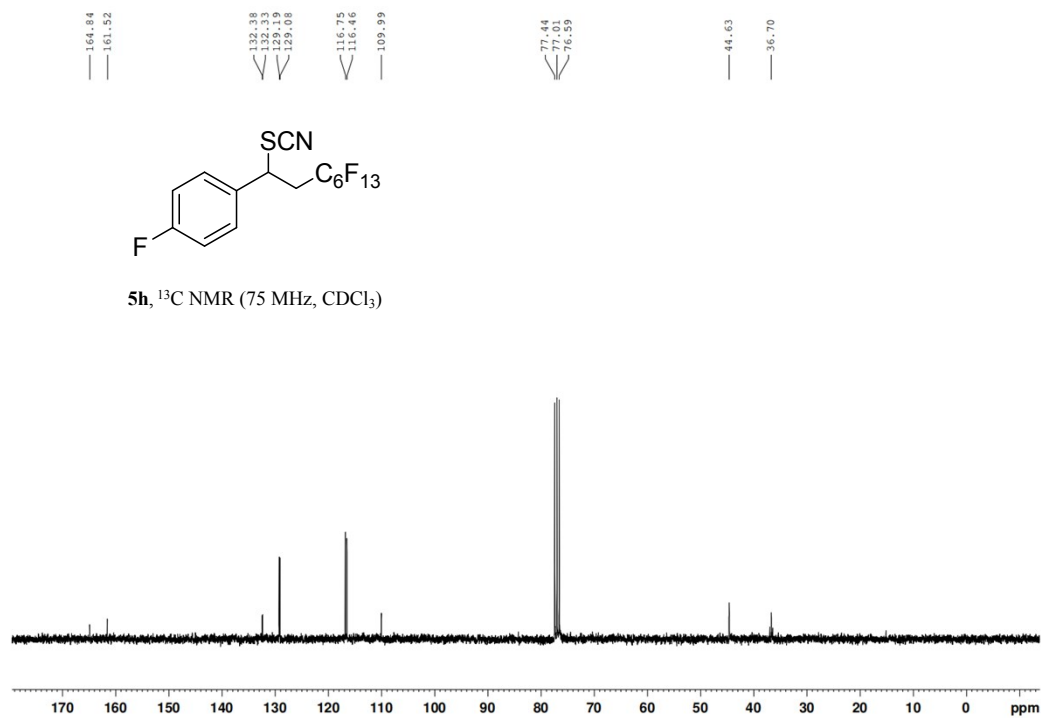

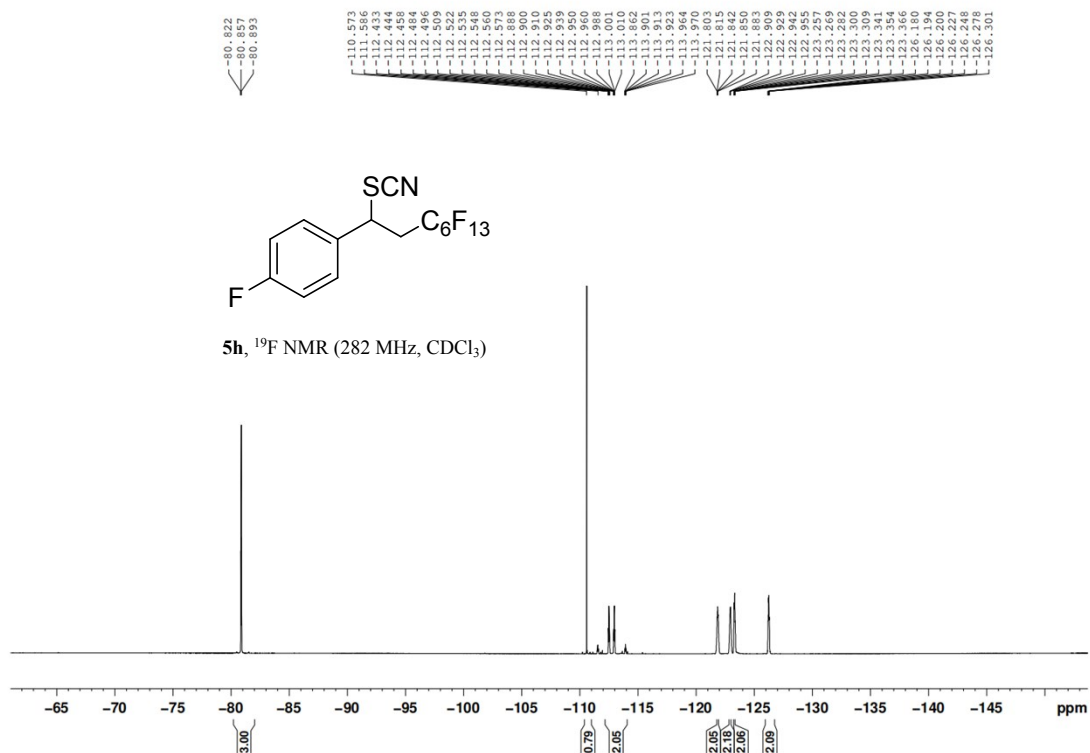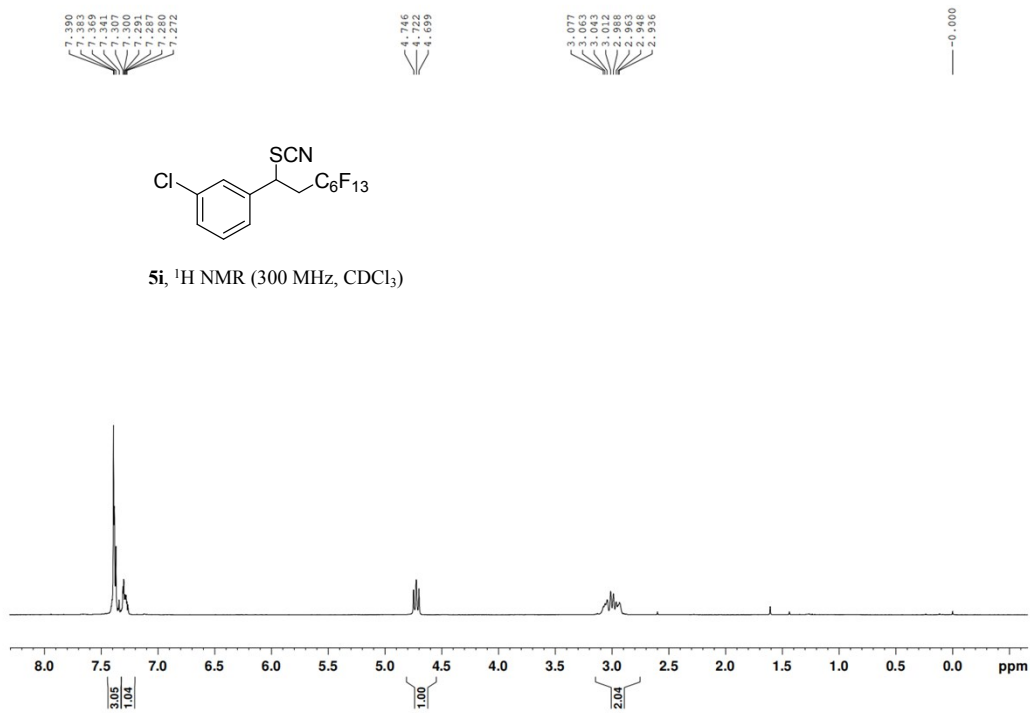

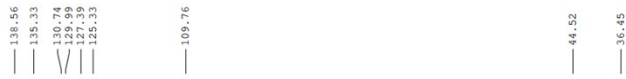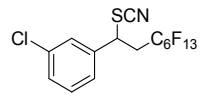

**5i**,  $^{13}\text{C}$  NMR (75 MHz,  $\text{CDCl}_3$ )

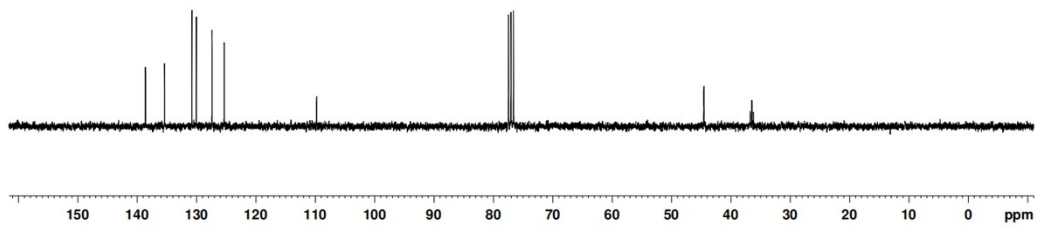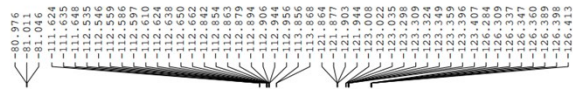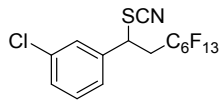

**5i**,  $^{19}\text{F}$  NMR (282 MHz,  $\text{CDCl}_3$ )

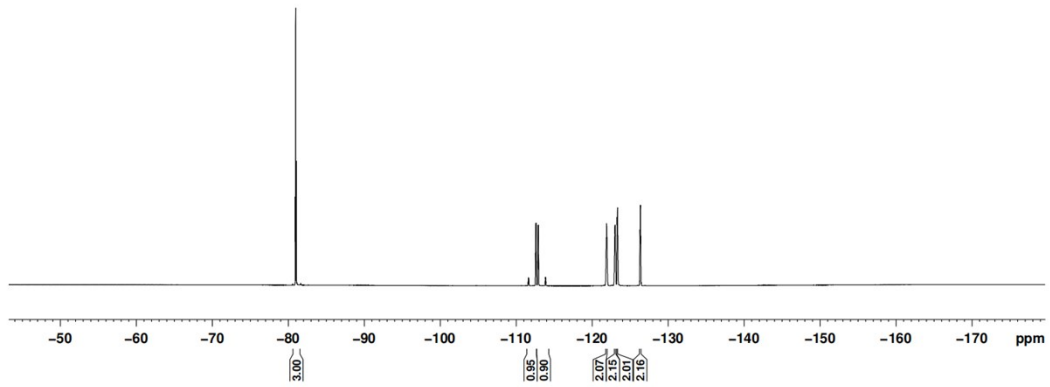







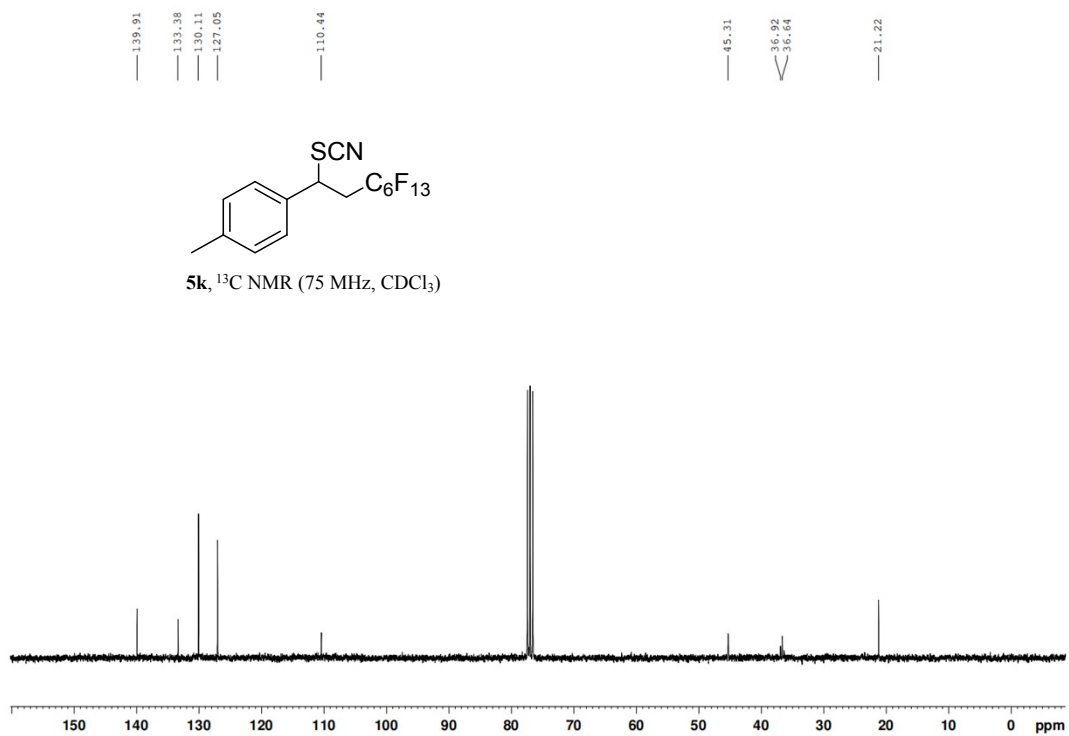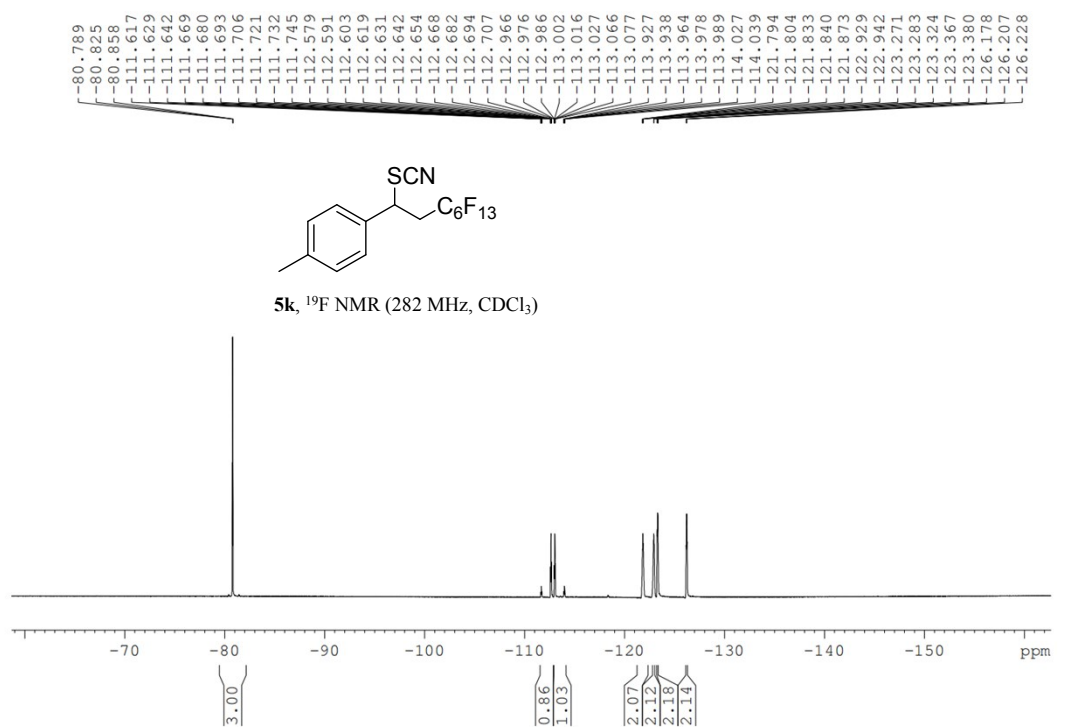

7.349  
7.276  
7.169  
7.141  
7.099

4.758  
4.736  
4.712  
4.688  
3.078  
3.035  
2.990  
2.963  
2.950  
2.937  
2.537  
2.504  
2.485  
2.436  
2.401  
2.338  
2.321  
2.299  
2.219  
2.121  
2.118  
2.102  
2.085  
2.051  
2.035  
2.004  
1.996  
1.966  
1.715  
1.686  
1.646  
1.616  
1.591  
1.554  
1.537  
1.524  
1.498  
1.469  
1.431  
0.924  
0.000

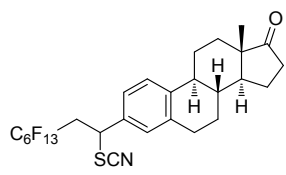

5I, <sup>1</sup>H NMR (300 MHz, CDCl<sub>3</sub>)

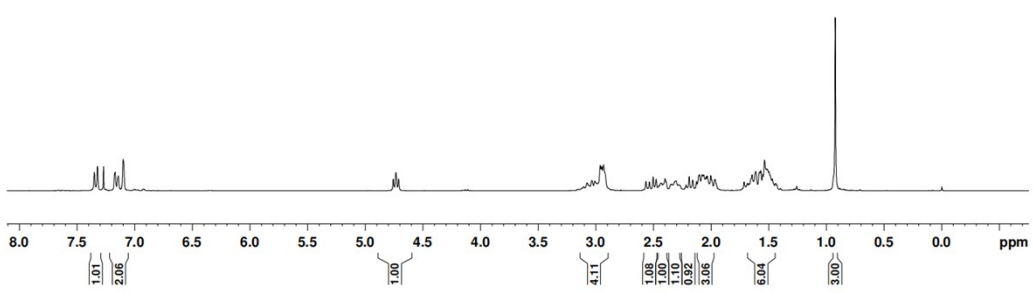

141.62  
137.85  
133.90  
127.70  
127.63  
126.46  
124.36  
124.30  
110.49

50.46  
47.91  
45.21  
44.35  
37.82  
35.89  
31.50  
29.32  
26.24  
25.53  
21.56  
13.79

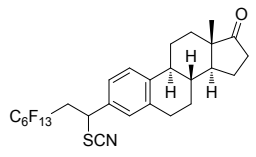

5I, <sup>13</sup>C NMR (75 MHz, CDCl<sub>3</sub>)

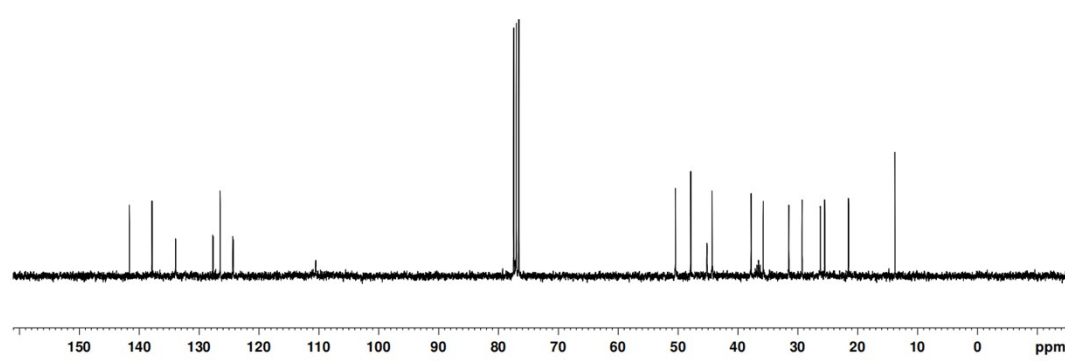

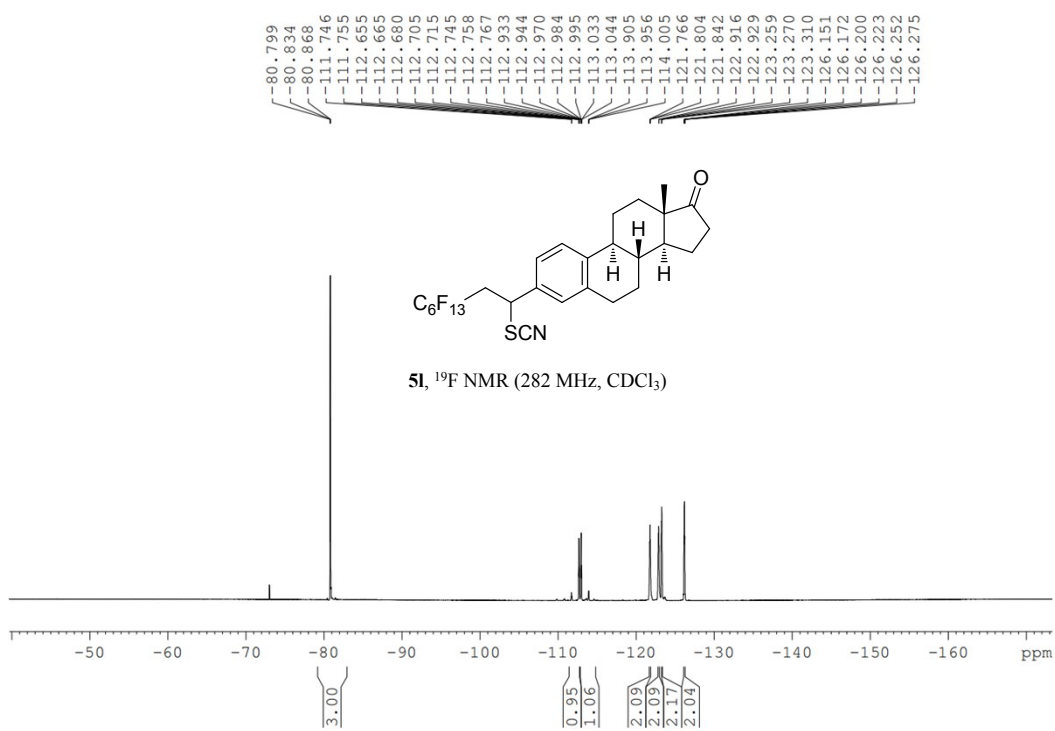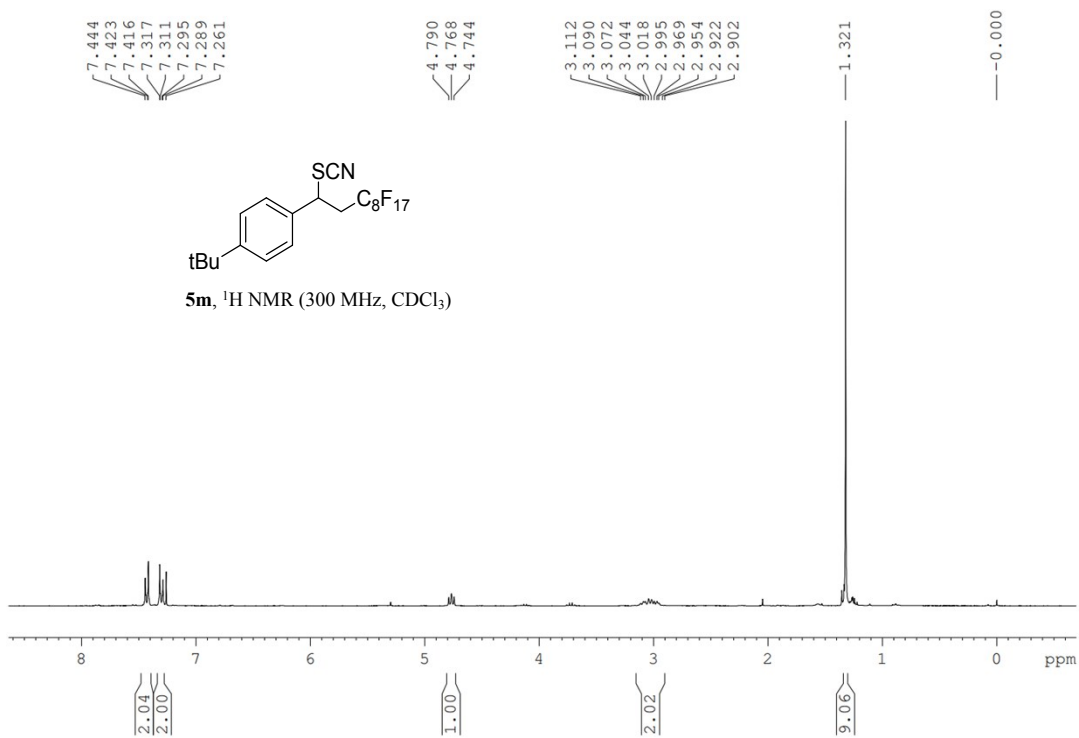

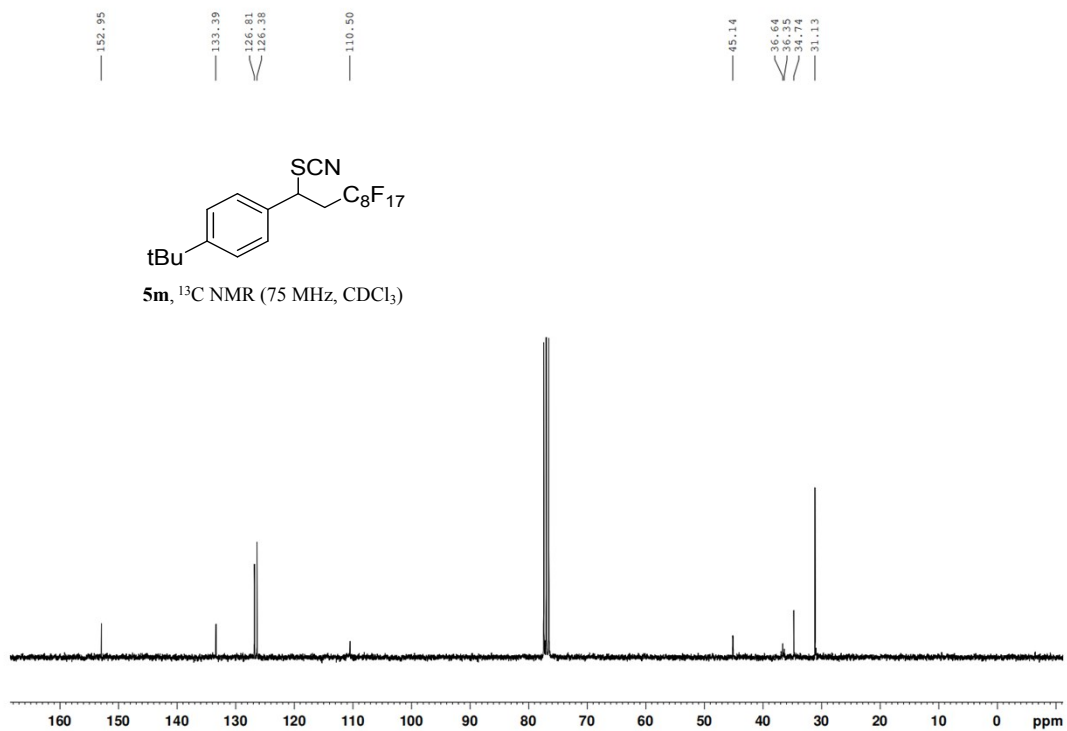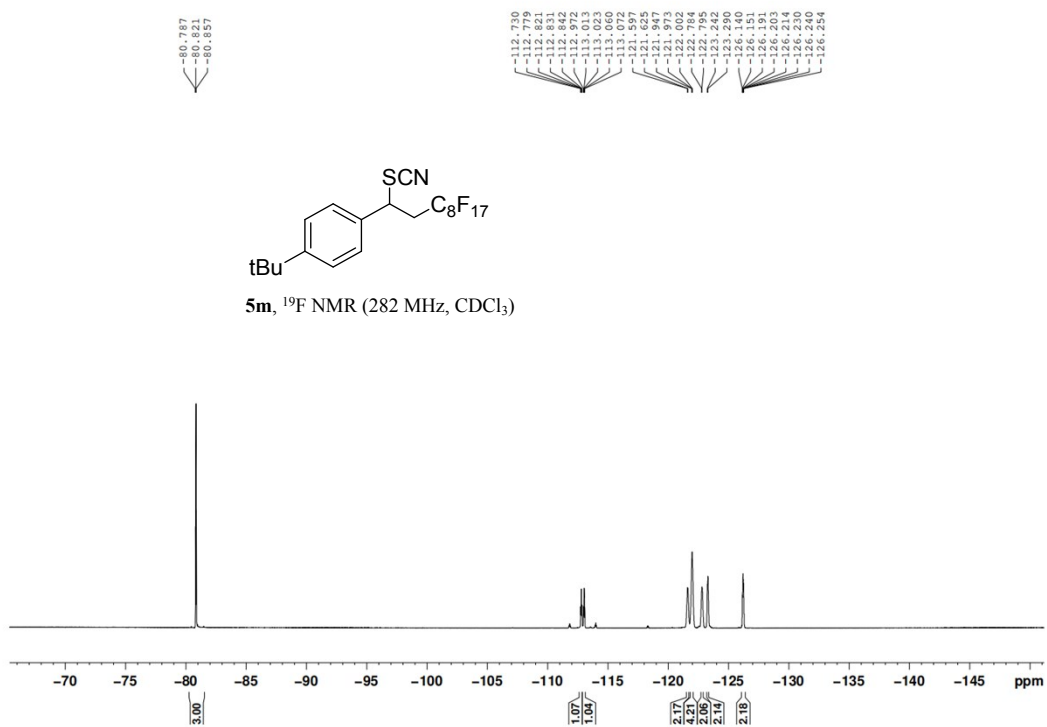

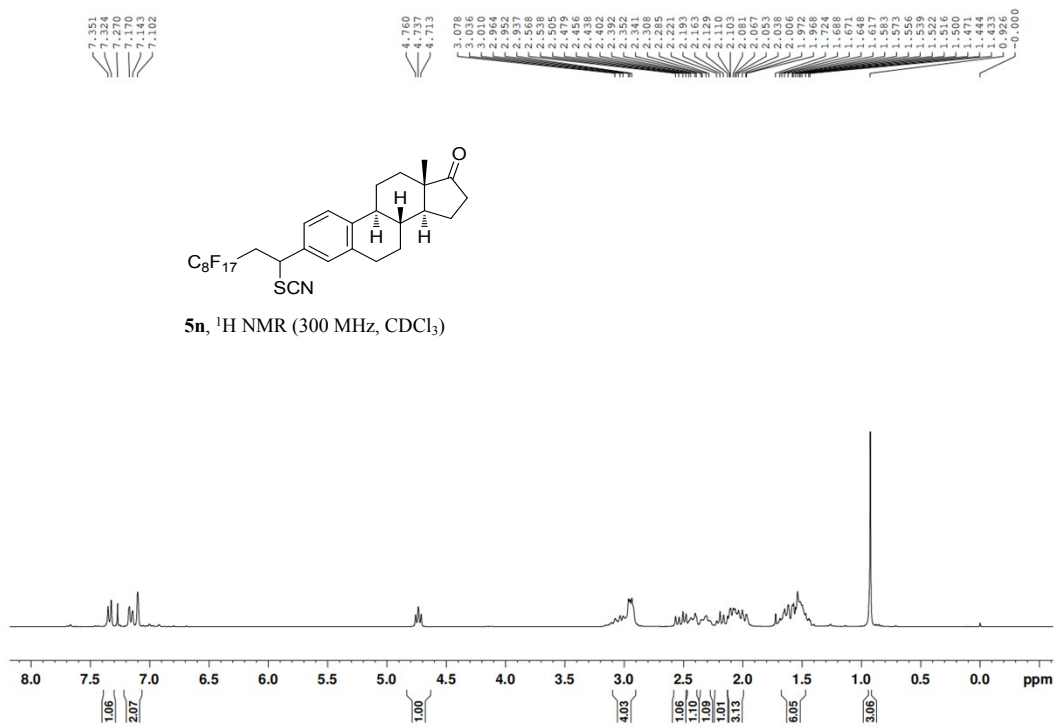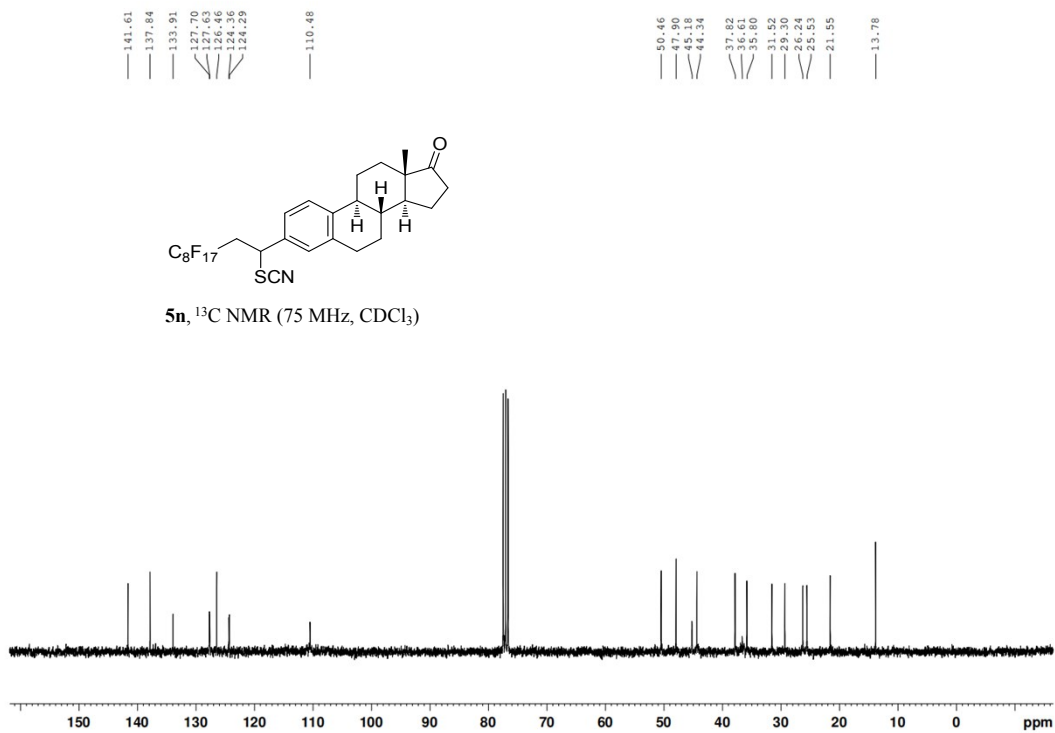

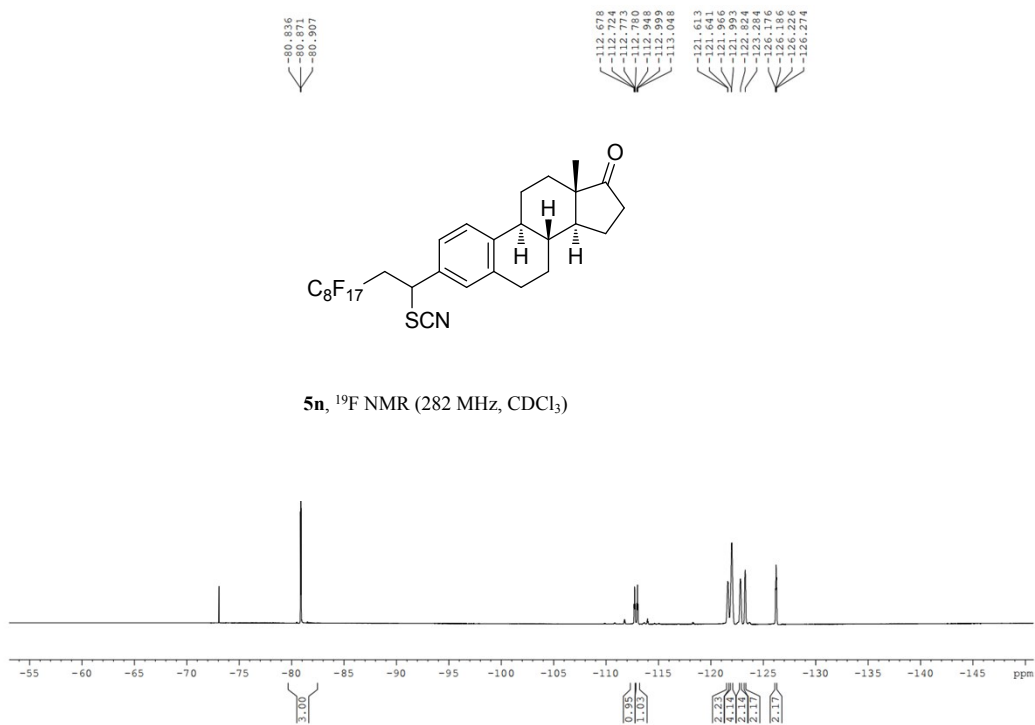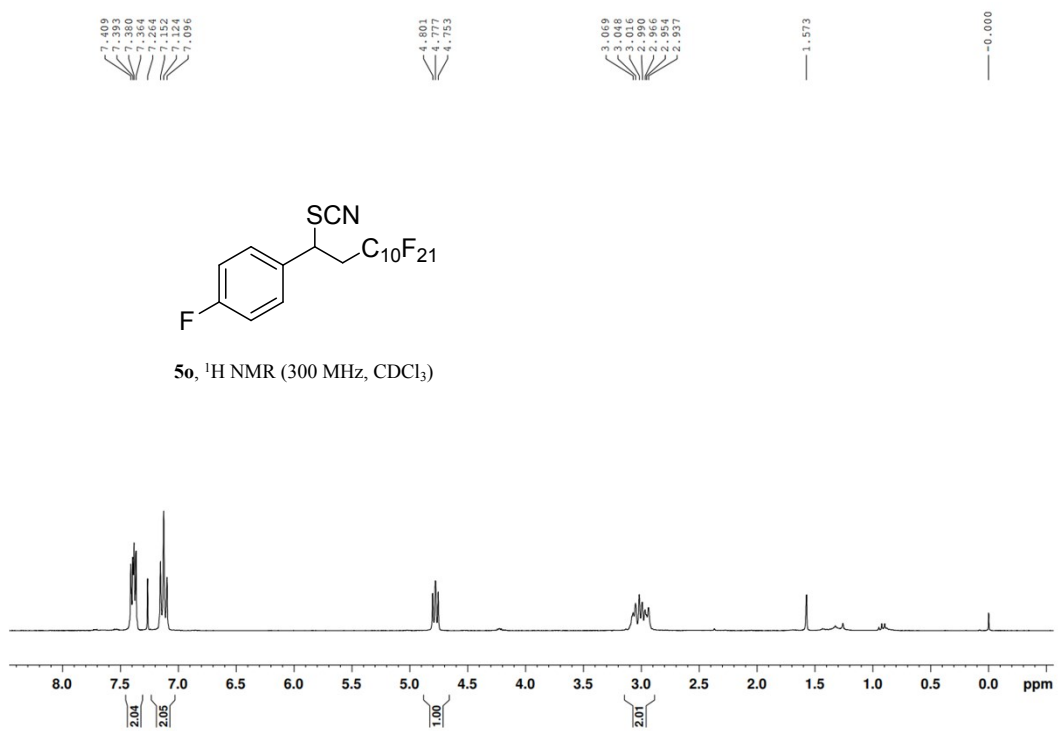



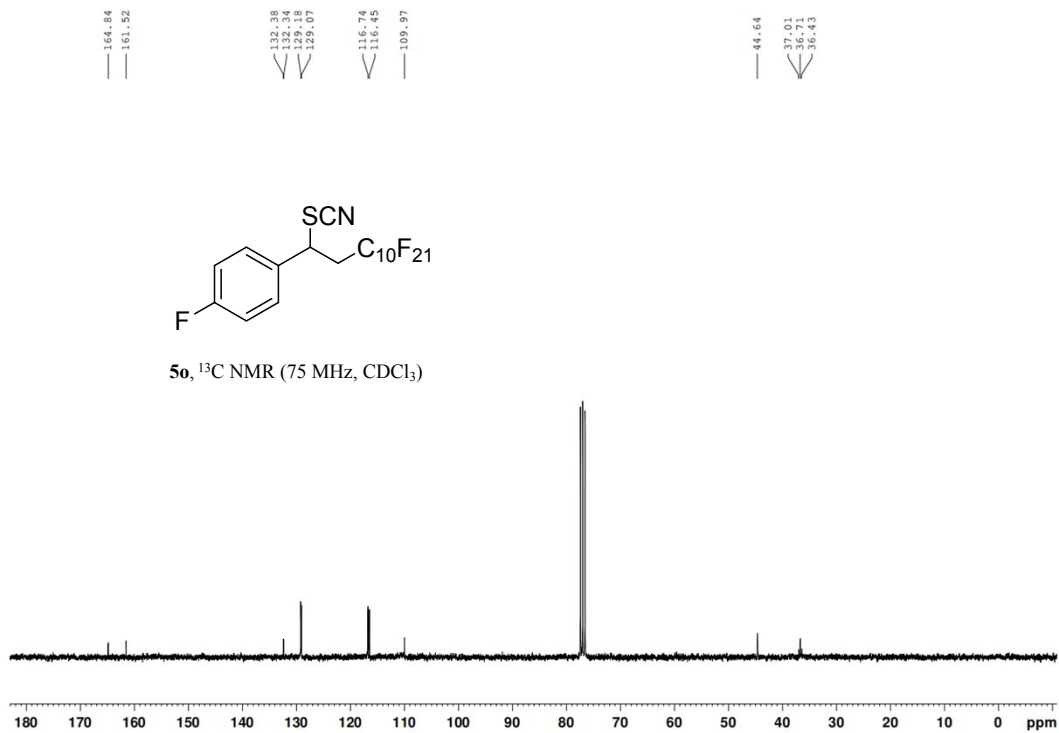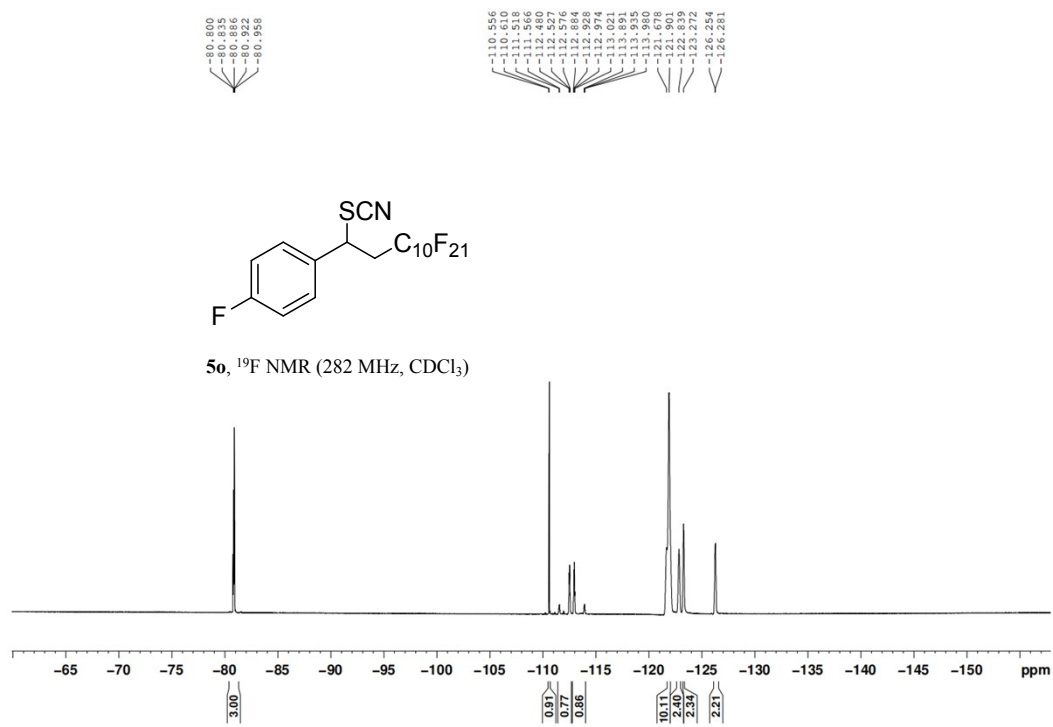

7.397  
7.386  
7.386  
7.354  
7.354  
7.306  
7.302  
7.302  
7.289  
7.280  
7.280  
7.263

4.739  
4.716  
4.692

3.074  
3.040  
3.040  
3.009  
2.985  
2.945  
2.945  
2.932

1.569

-0.000

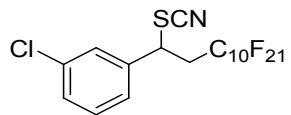

5p, <sup>1</sup>H NMR (300 MHz, CDCl<sub>3</sub>)

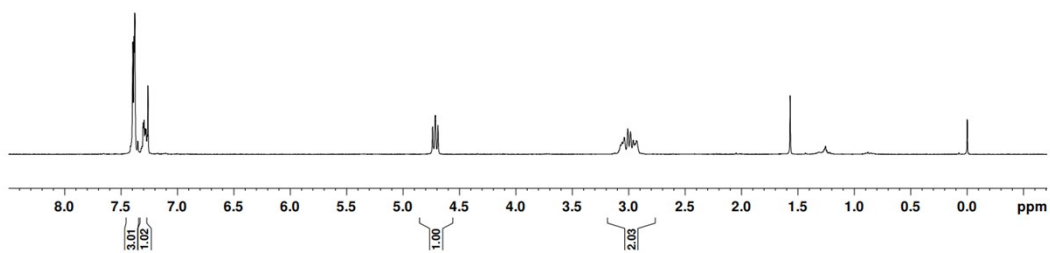

138.50  
135.38  
130.77  
130.04  
127.39  
125.32

109.70

44.57

36.54  
36.26

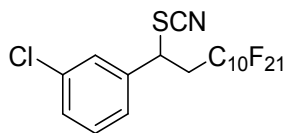

5p, <sup>13</sup>C NMR (75 MHz, CDCl<sub>3</sub>)

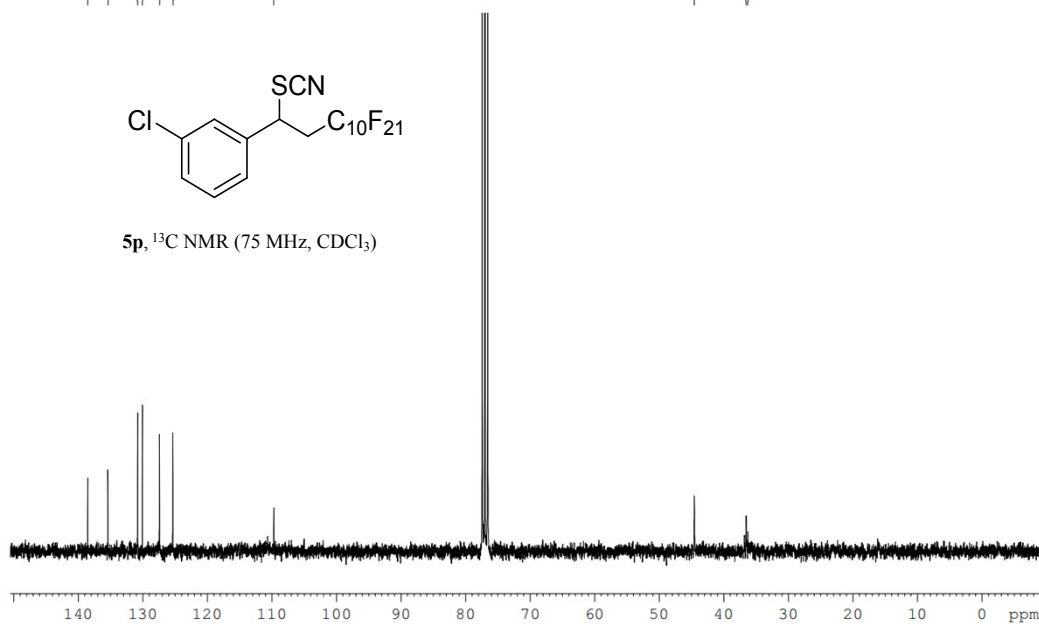

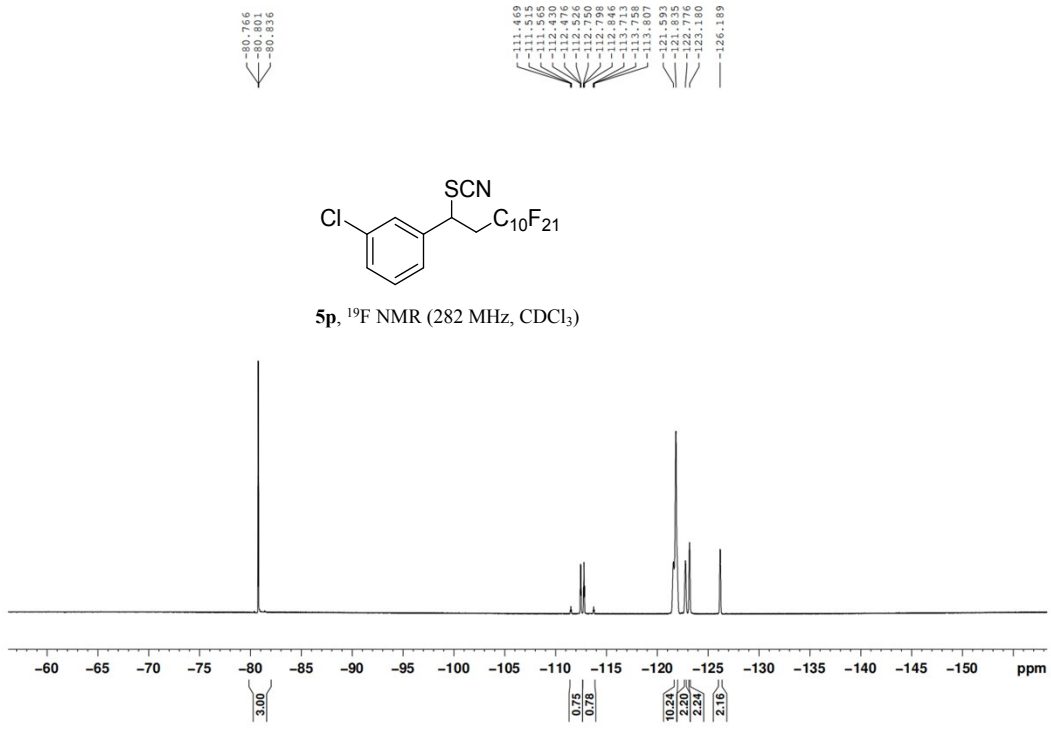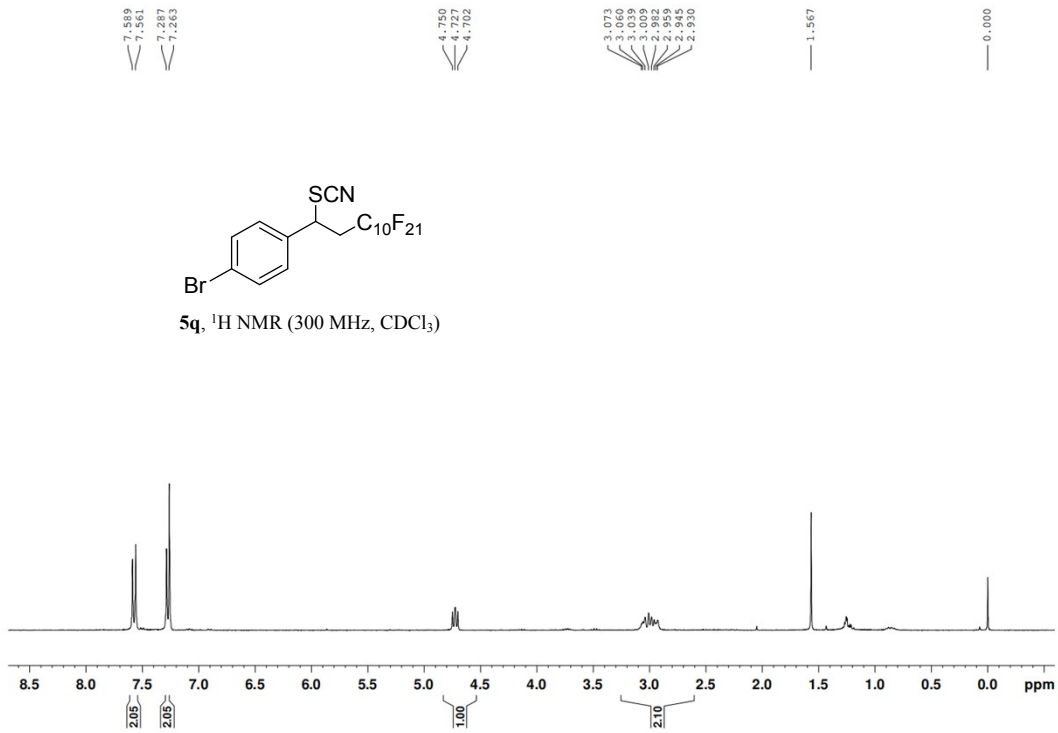

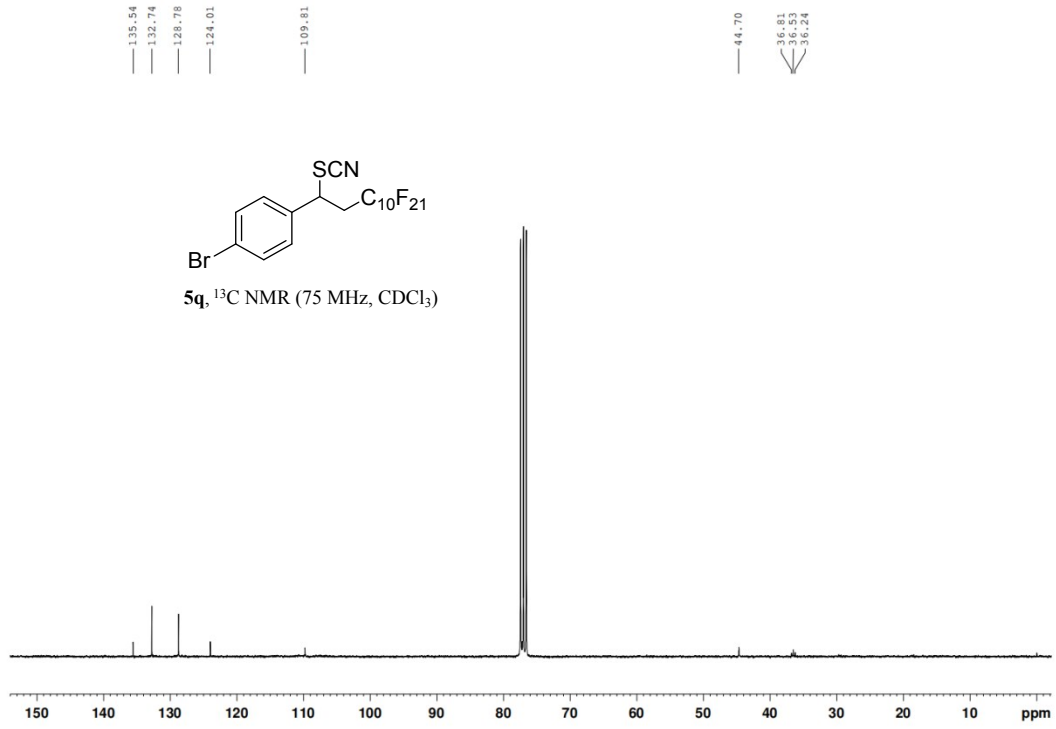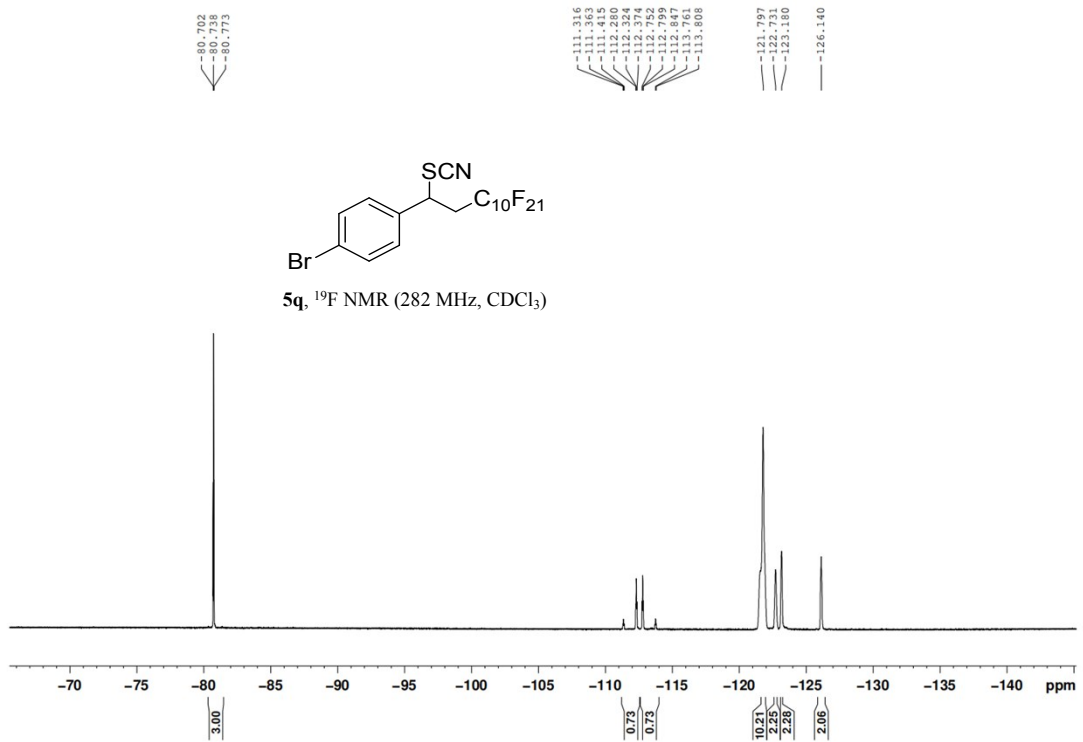

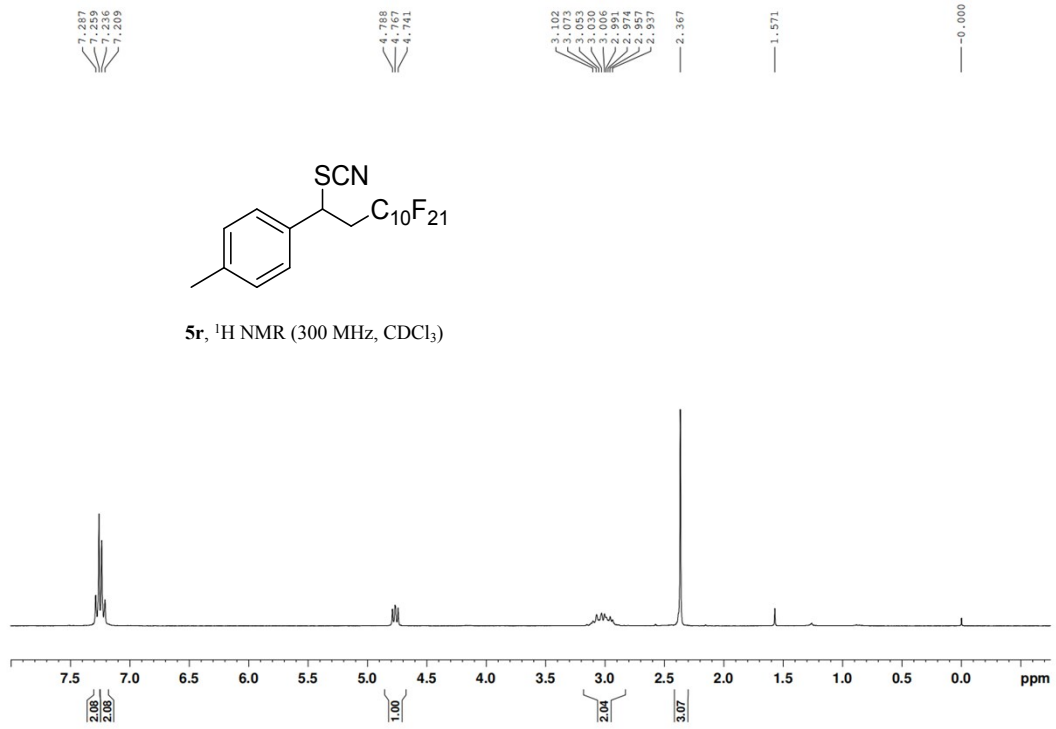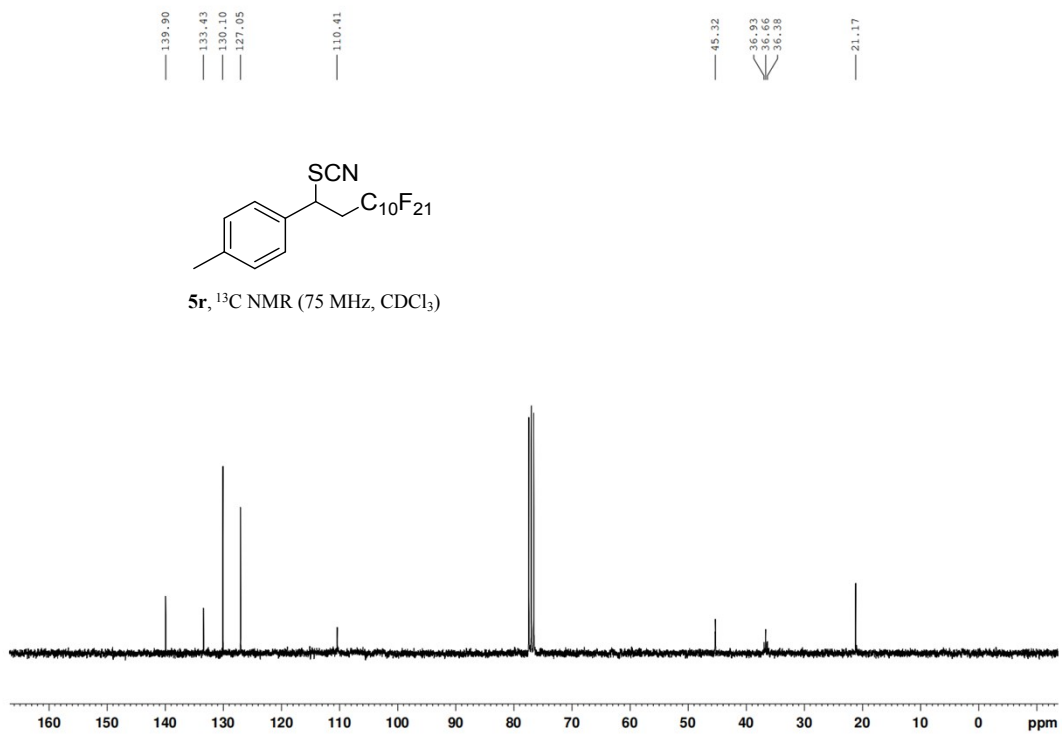

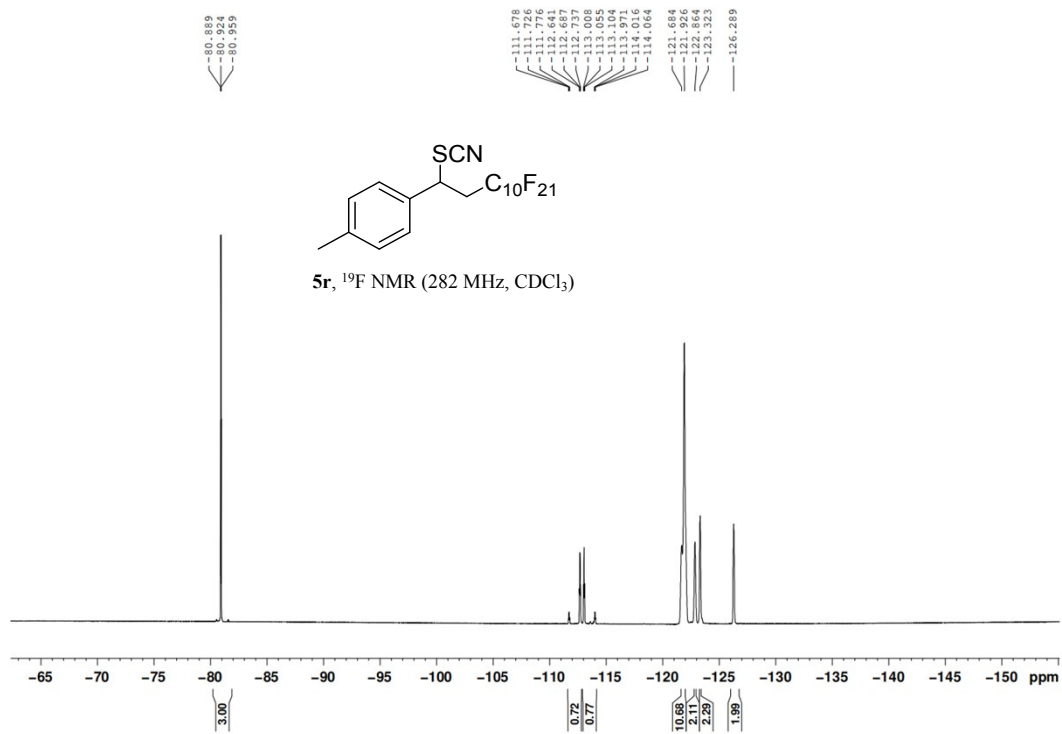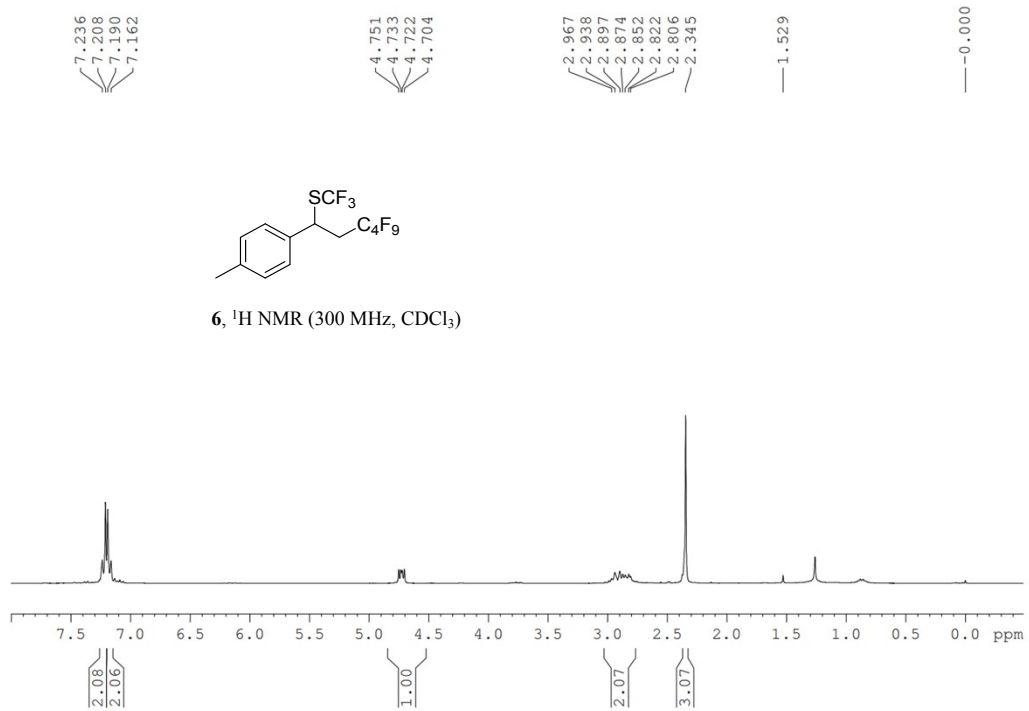

138.75  
135.03  
131.84  
129.86  
127.76  
127.02

77.41  
76.99  
76.56

41.74  
37.95  
37.68  
37.40

21.10

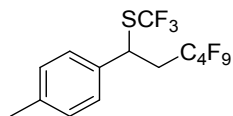

**6**,  $^{13}\text{C}$  NMR (75 MHz,  $\text{CDCl}_3$ )

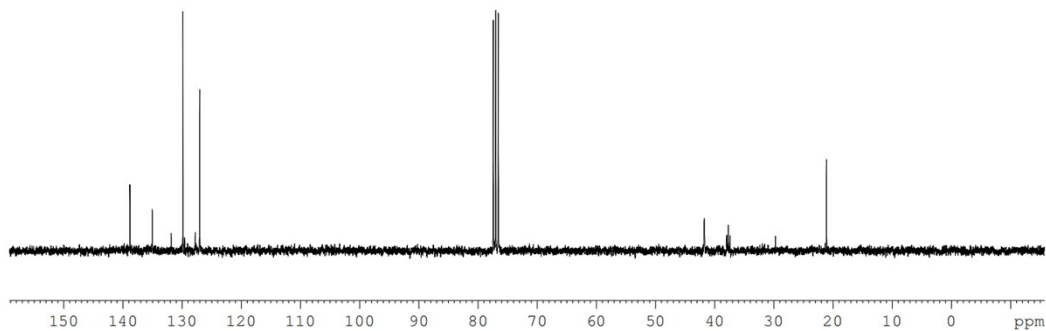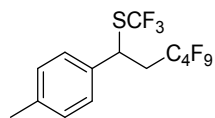

**6**,  $^{19}\text{F}$  NMR (282 MHz,  $\text{CDCl}_3$ )

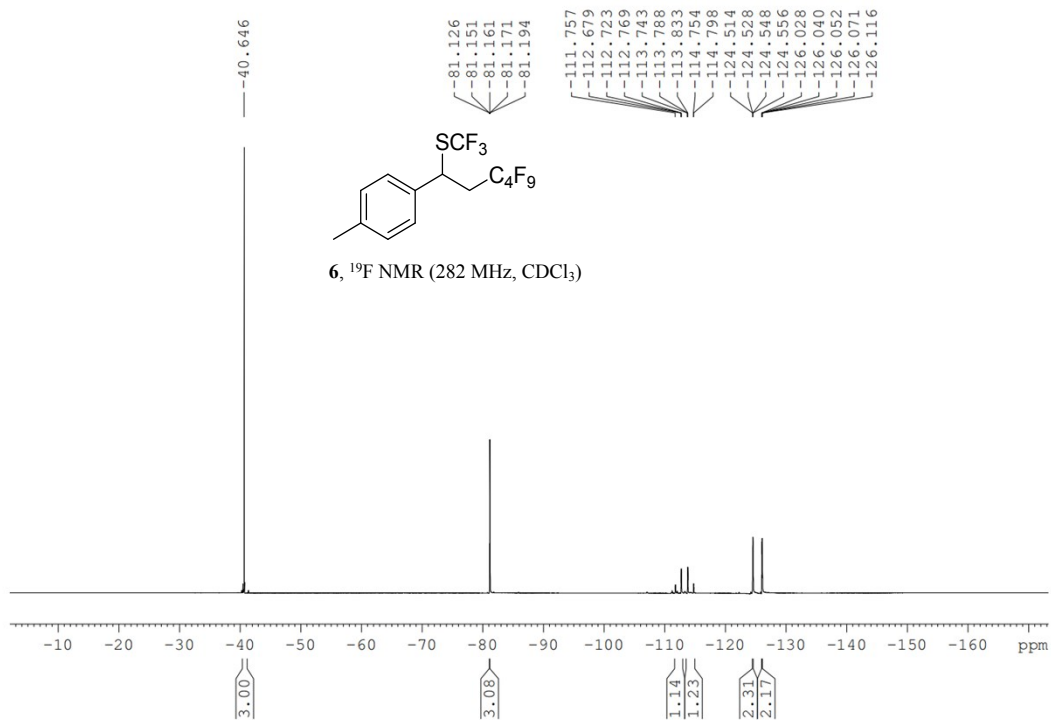

7.168  
7.107  
7.089  
7.089  
7.052  
7.025  
7.009  
6.992

3.736  
3.705  
3.705  
3.688  
3.675  
3.641  
3.641  
2.797  
2.783  
2.783  
2.733  
2.733  
2.709  
2.677  
2.623  
2.592  
2.564  
2.564  
2.281

-0.000

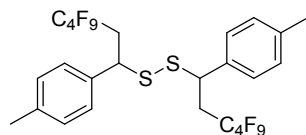

7, <sup>1</sup>H NMR (300 MHz, CDCl<sub>3</sub>)

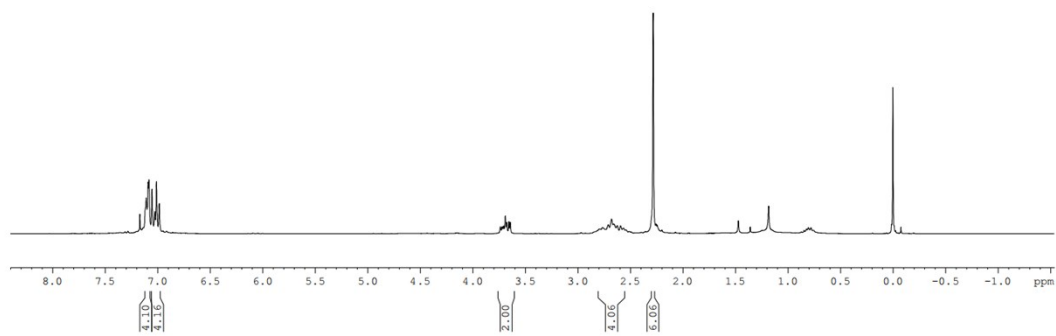

137.49  
137.43  
134.33  
128.58  
128.33  
126.77  
126.64

76.41  
75.98  
75.56

45.38  
45.06  
34.53  
34.25  
34.18  
33.97  
28.70  
20.11  
20.09

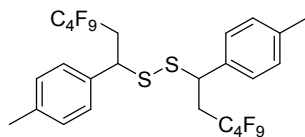

7, <sup>13</sup>C NMR (75 MHz, CDCl<sub>3</sub>)

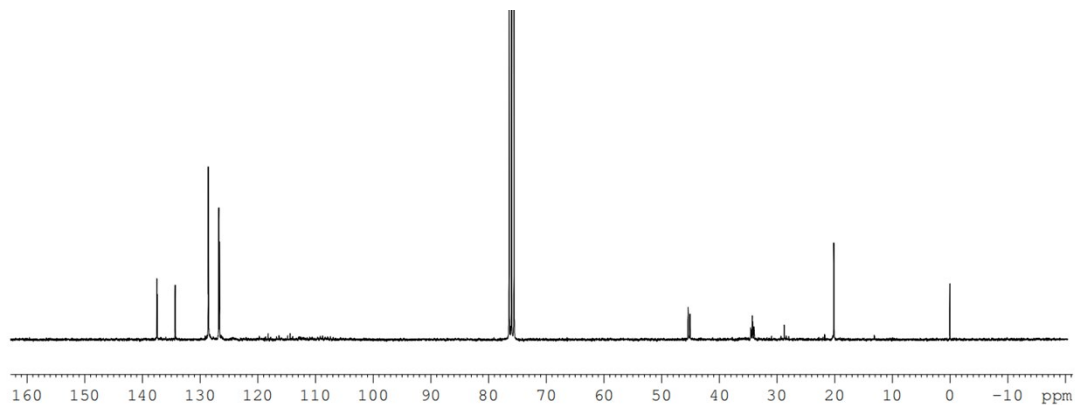



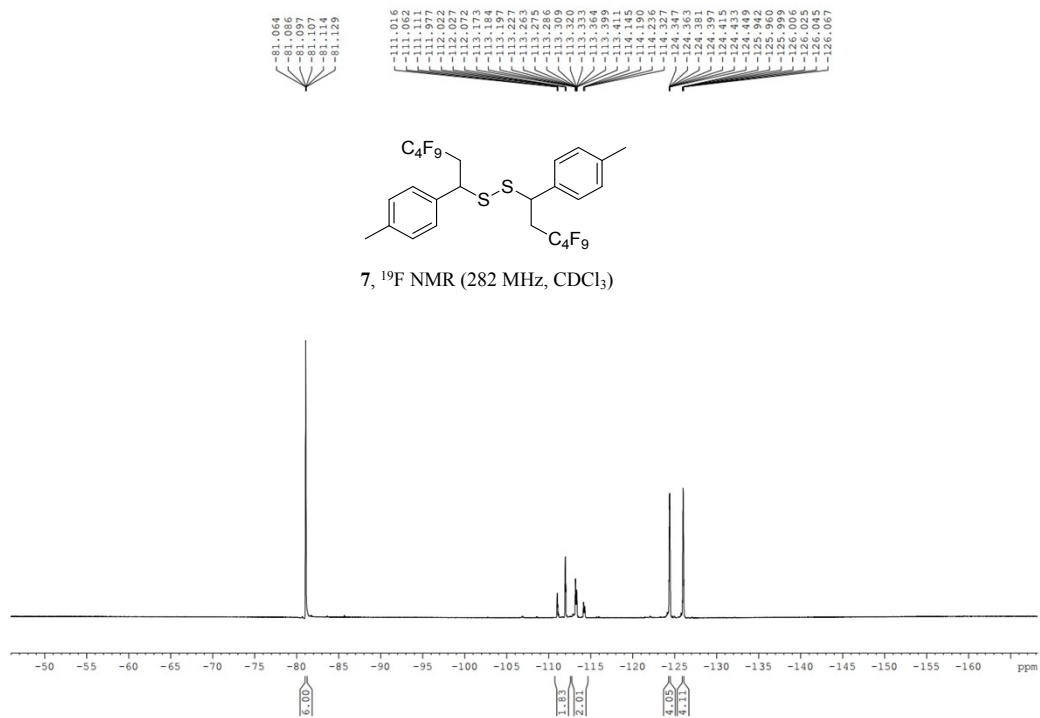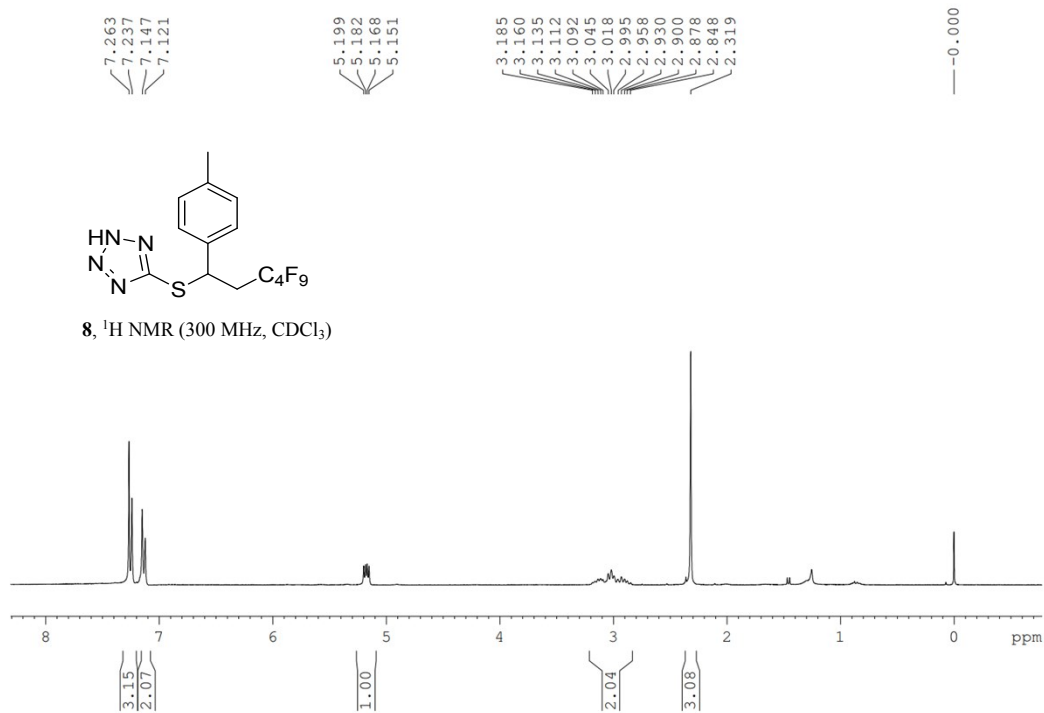

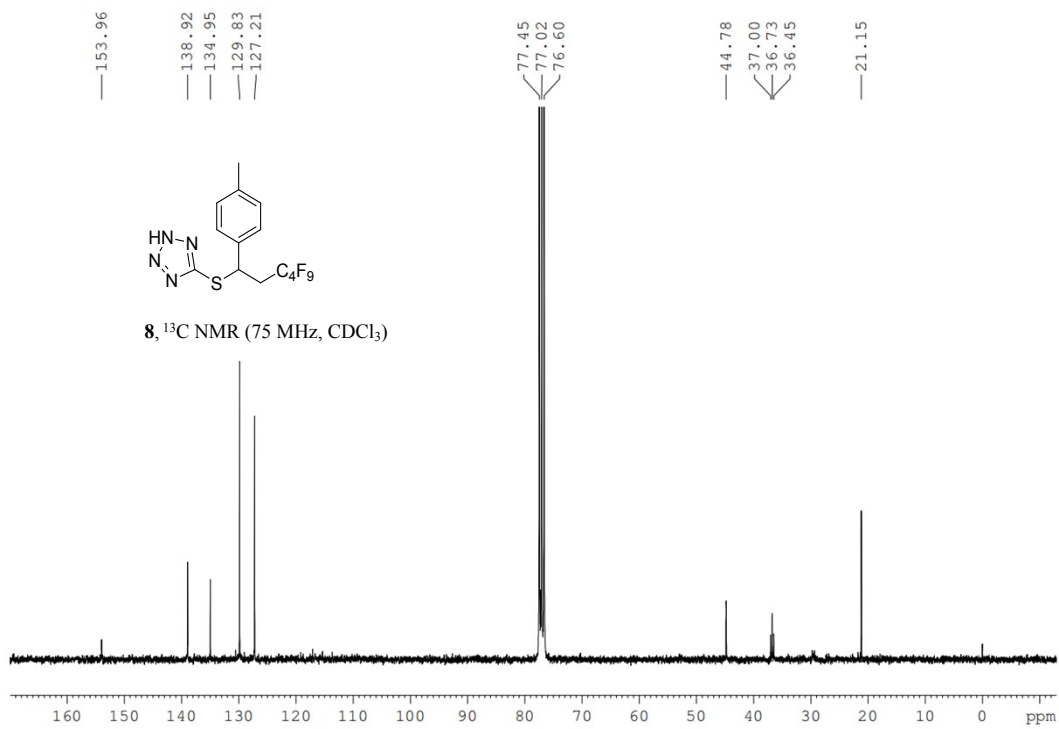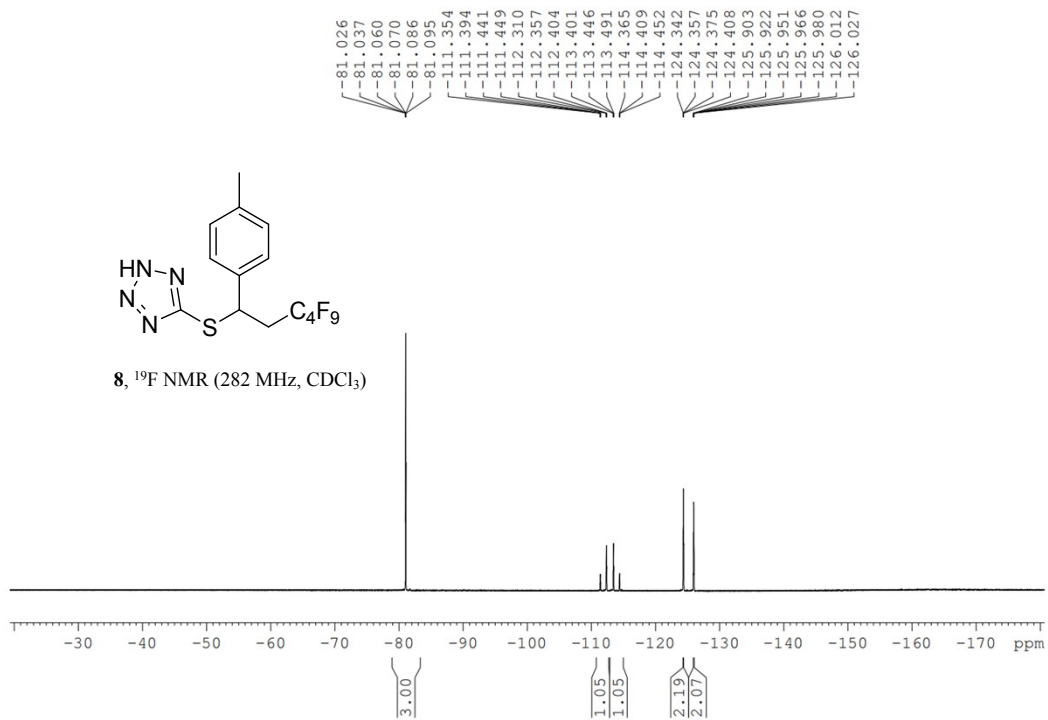

Supplement: d1qo00126d1.pdf [file d1qo00126d1.pdf]
